# Supplementary material
Source: Royal Society of Chemistry journal article supplement (doi:10.1039/d6nj01107a)
Supplement: d6nj01107a1.pdf [file d6nj01107a1.pdf]

## Supporting Information

### **Direct Access to 2-Amino-3-cyano-4H-pyrans/ 4H-chromenes by [ONO]-Pincer Supported Nickel(II) Phosphine Complexes via Dehydrogenative Annulation of Alcohols**

Sekar Pranesh Kavin<sup>a</sup> and Rengan Ramesh <sup>\*a</sup>

<sup>a</sup> School of Chemistry, Bharathidasan University, Tiruchirappalli – 620 024, India.

E-mail: ramesh\_bdu@yahoo.com, rramesh@bdu.ac.in and phone No. 0431- 2407053; Fax: 0091-431-2407045

# Supporting Information

## Contents

|   |                                                                                |          |
|---|--------------------------------------------------------------------------------|----------|
| 1 | Materials and methods .....                                                    | S3       |
| 2 | X-ray crystallographic data .....                                              | S3-S5    |
| 3 | IR spectra of the complexes <b>C1-C3</b> .....                                 | S6-S7    |
| 4 | NMR spectra of the complexes <b>C1-C3</b> .....                                | S7- S11  |
| 5 | HR-MS spectra of complexes <b>C1-C3</b> .....                                  | S12- S13 |
| 5 | NMR spectra of the catalytic isolated products ( <b>4a-4l and 5a-5l</b> )..... | S13-S40  |
| 6 | HRMS spectra of the catalytic isolated products.....                           | S40-S44  |
| 7 | NMR spectra of the intermediates.....                                          | S44-S45  |
| 8 | Confirmation of hydrogen gas .....                                             | S45      |
| 9 | References .....                                                               | S46      |

# Supporting Information

## 1. Materials and methods

Chemically pure and analar grade reagents were used for all the reactions. Commercially available  $[\text{NiCl}_2(\text{PPh}_3)_2]$ , N-diethylamino benzaldehyde derivatives, hydrazide derivatives, dimedone, 4-hydroxycoumarin,  $\text{CDCl}_3$ ,  $\text{DMSO-d}_6$  and various alcohols was used as supplied from Sigma Aldrich. The solvents were freshly distilled before use following the standard procedures.<sup>1</sup> Melting point was recorded in the Boeties micro heating table and is uncorrected. Infrared spectra of complexes were recorded in KBr pellets with a Perkin – Elmer 597 spectrophotometer in the range of  $4000\text{-}400\text{ cm}^{-1}$ . The  $^1\text{H}$  and  $^{13}\text{C}$  NMR spectra were recorded in  $\text{CDCl}_3$  and  $\text{DMSO-d}_6$  with Bruker 400 MHz instrument using TMS as internal reference. High-Resolution mass spectrometry are recorded with Agilent QTOF G6545XT spectrometer at 50000 resolution using ESI mode.

## 2. X-ray crystallographic data collection

A single crystal with high quality and exhibiting good morphology was chosen for X-ray diffraction intensity measurements. The X-ray diffraction intensity data was collected at room temperature (293 K) on a Bruker D8 Quest Eco diffractometer using  $\text{MoK}\alpha$  radiation ( $0.71073\text{ \AA}$ ). During the data collection, the crystal to detector distance was set to 4.5 cm. The data collection was monitored by APEX-III program suit.<sup>2</sup> further, the integration, Lorentz and polarization corrections and merging of data were carried out using SAINT. The absorption correction was performed by SADABS and the data was averaged using SORTAV software.<sup>3</sup> The hydrogen atoms of all C–H, N–H and O–H hydrogen bonds were located from the difference Fourier map and were refined isotropically. Idealized methyl group H-atom position was calculated geometrically  $[\text{C-H} = 0.96\text{ \AA}]^\circ$  and refined using riding model with  $\text{Uiso}(\text{H}) = 1.5\text{ Ueq}(\text{C})$ . The structure was solved by direct methods using SHELXS-2014<sup>4</sup> and refined by SHELXL-2014<sup>5</sup> programs incorporated to WINGX package.<sup>6</sup> The ORTEP of the molecule with displacement ellipsoids drawn at 30% probability level are shown in **Figure 2**. The molecular and packing diagrams were generated using the software MERCURY.<sup>7</sup>

## Supporting Information

Table S1. Crystal data and structure refinement for complex C2.

|                                                      |                                                                   |
|------------------------------------------------------|-------------------------------------------------------------------|
| <b>CCDC</b>                                          | 2334596                                                           |
| <b>Empirical formula</b>                             | C <sub>34</sub> H <sub>32</sub> N <sub>3</sub> NiO <sub>3</sub> P |
| <b>Formula weight</b>                                | 620.30                                                            |
| <b>Temperature/K</b>                                 | 295(2)                                                            |
| <b>Crystal system</b>                                | triclinic                                                         |
| <b>Space group</b>                                   | P-1                                                               |
| <b>a/Å, b/Å, c/Å</b>                                 | 11.9646(10), 16.0861(12), 16.6355(15)                             |
| <b>α/°, β/°, γ/°</b>                                 | 74.568(7), 78.164(8), 79.707(7)                                   |
| <b>Volume/Å<sup>3</sup></b>                          | 2994.4(5)                                                         |
| <b>Z</b>                                             | 4                                                                 |
| <b>ρ<sub>calc</sub> g/cm<sup>3</sup></b>             | 1.376                                                             |
| <b>μ /mm<sup>-1</sup></b>                            | 0.741                                                             |
| <b>F(000)</b>                                        | 1296.0                                                            |
| <b>Crystal size/mm</b>                               | 0.35 × 0.17 × 0.12                                                |
| <b>2Θ for data collection/°</b>                      | 6.7 to 62.888                                                     |
| <b>Index ranges</b>                                  | -14 ≤ h ≤ 16, -22 ≤ k ≤ 21, -22 ≤ l ≤ 22                          |
| <b>Reflections collected</b>                         | 30127                                                             |
| <b>Independent reflections</b>                       | 14124 [R <sub>int</sub> = 0.1420, R <sub>sigma</sub> = 0.1957]    |
| <b>Data/restraints/parameters</b>                    | 14124/0/761                                                       |
| <b>Goodness-of-fit on F<sup>2</sup></b>              | 1.151                                                             |
| <b>Final R indexes [I &gt; 2σ (I)]</b>               | R <sub>1</sub> = 0.1453, wR <sub>2</sub> = 0.3398                 |
| <b>Final R indexes [all data]</b>                    | R <sub>1</sub> = 0.2361, wR <sub>2</sub> = 0.4120                 |
| <b>Largest diff. peak and hole / eÅ<sup>-3</sup></b> | 4.23/-1.01                                                        |

## Supporting Information

Table S2. Selected bond lengths (Å) and bond angles (°) for complexes C2.

| Complex C2 |            |
|------------|------------|
| Ni1–P1     | 2.2073(19) |
| Ni1–O1     | 1.817(5)   |
| Ni1–N1     | 1.839(6)   |
| Ni1–O2     | 1.803(5)   |
| O1–Ni1–P1  | 90.48(18)  |
| O1–Ni1–N1  | 84.3(3)    |
| N1–Ni1–P1  | 174.8(2)   |
| O2–Ni1–P1  | 89.51(15)  |
| O2–Ni1–O1  | 177.4(2)   |
| O2–Ni1–N1  | 95.7(2)    |

# Supporting Information

## 3. IR Spectra of the complexes C1-C3:

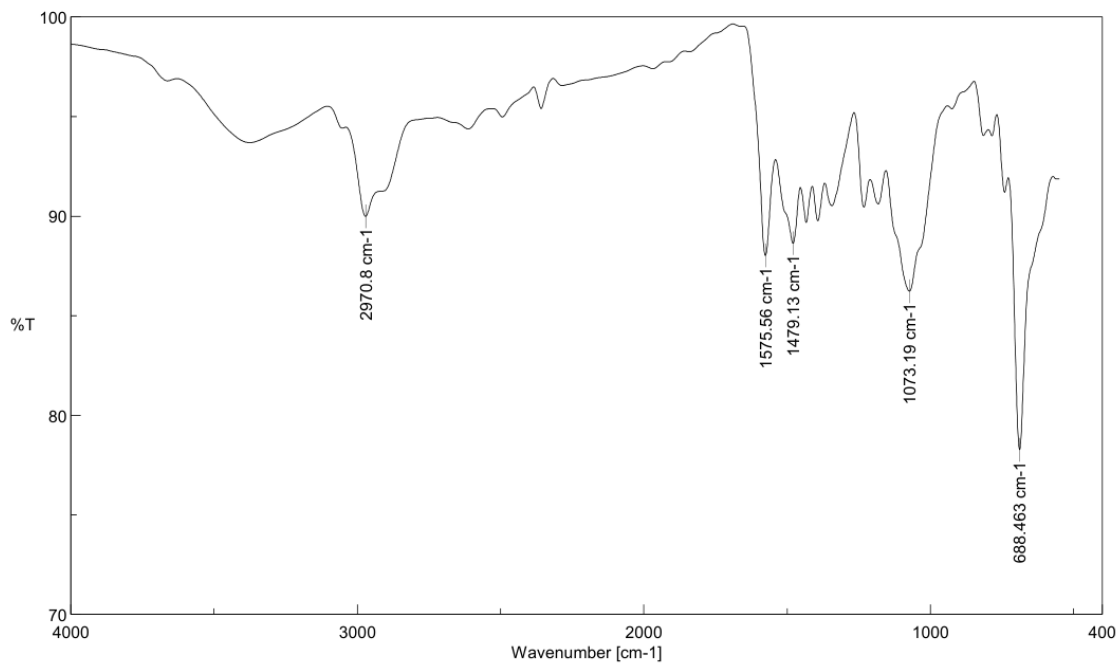

**Figure S1.** FT-IR spectrum of Complex C1

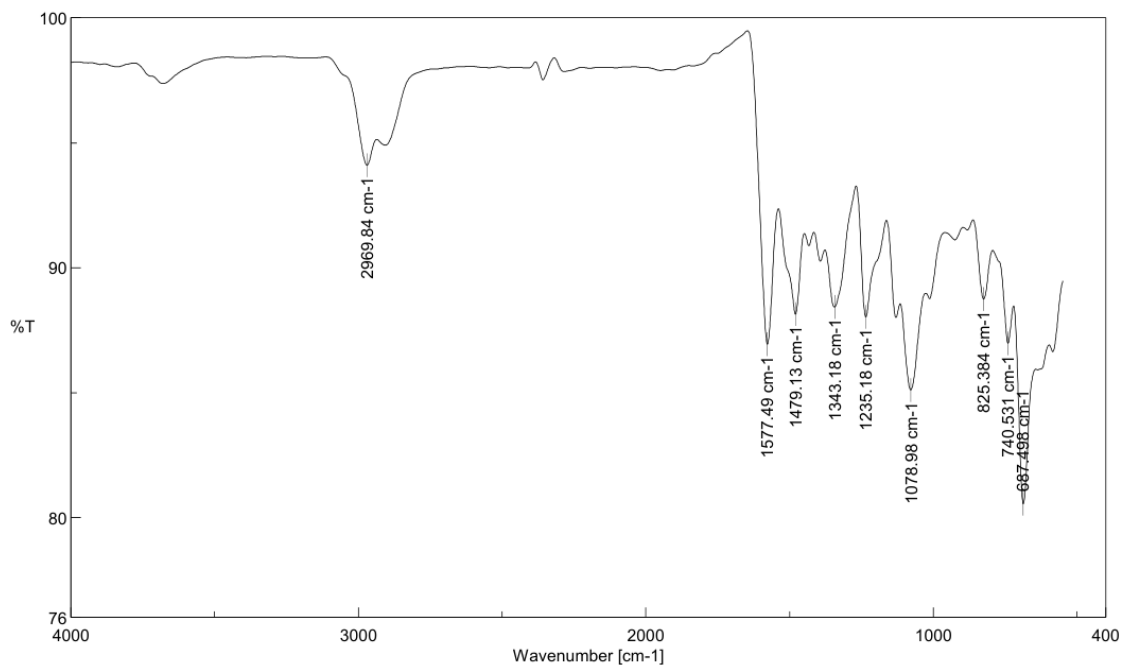

**Figure S2.** FT-IR spectrum of Complex C2

## Supporting Information

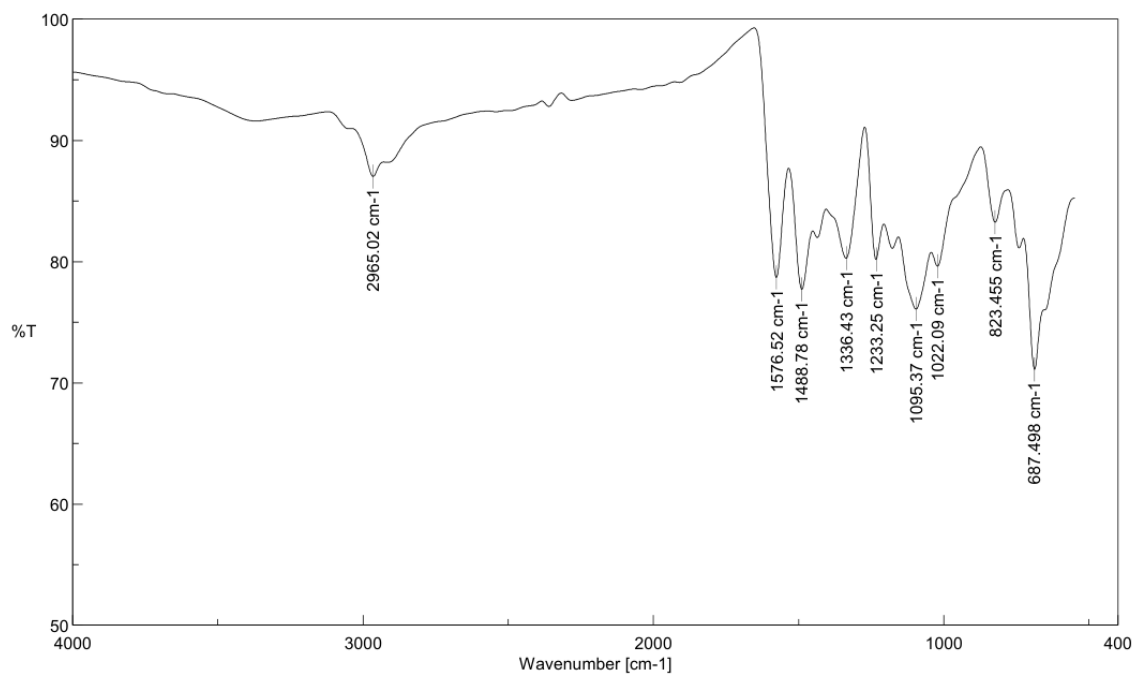

Figure S3. FT-IR spectrum of Complex C3

### 4. NMR spectra of Ni(II) NNO complexes C1-C3

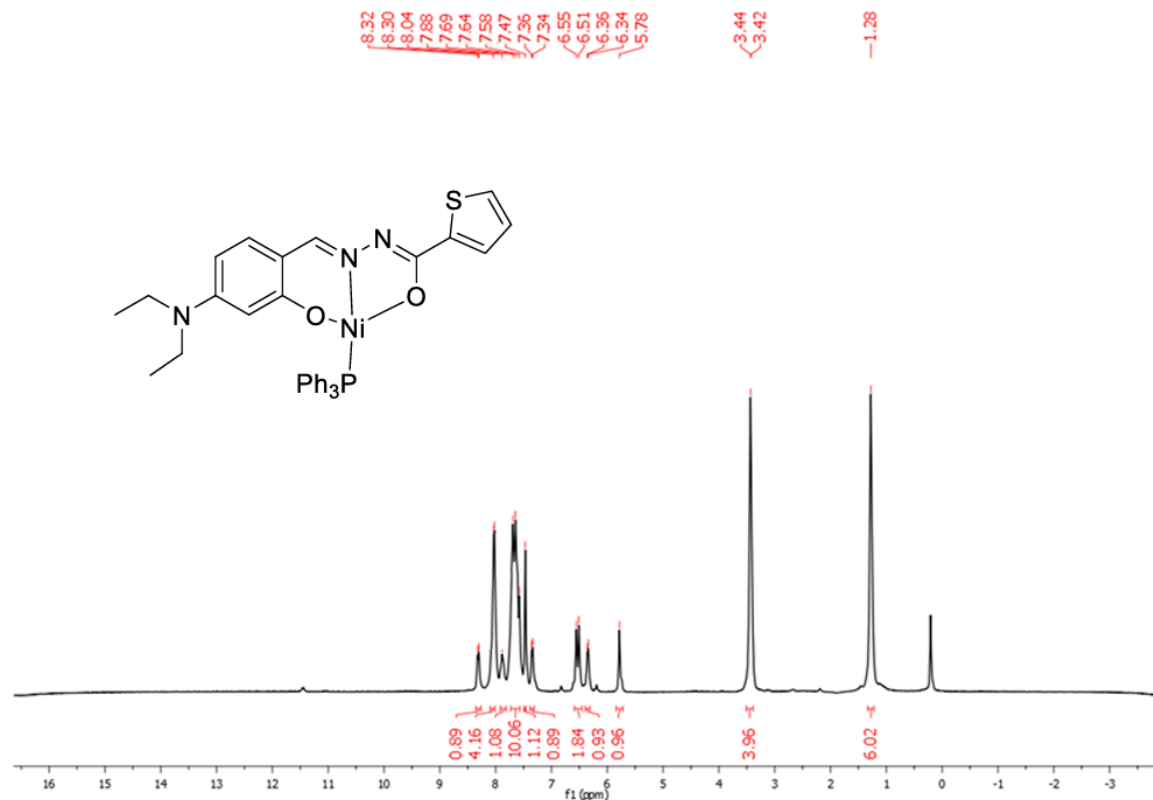

Figure S4. <sup>1</sup>H NMR spectrum of complex C1 in CDCl<sub>3</sub> (400 MHz, 293 K).

# Supporting Information

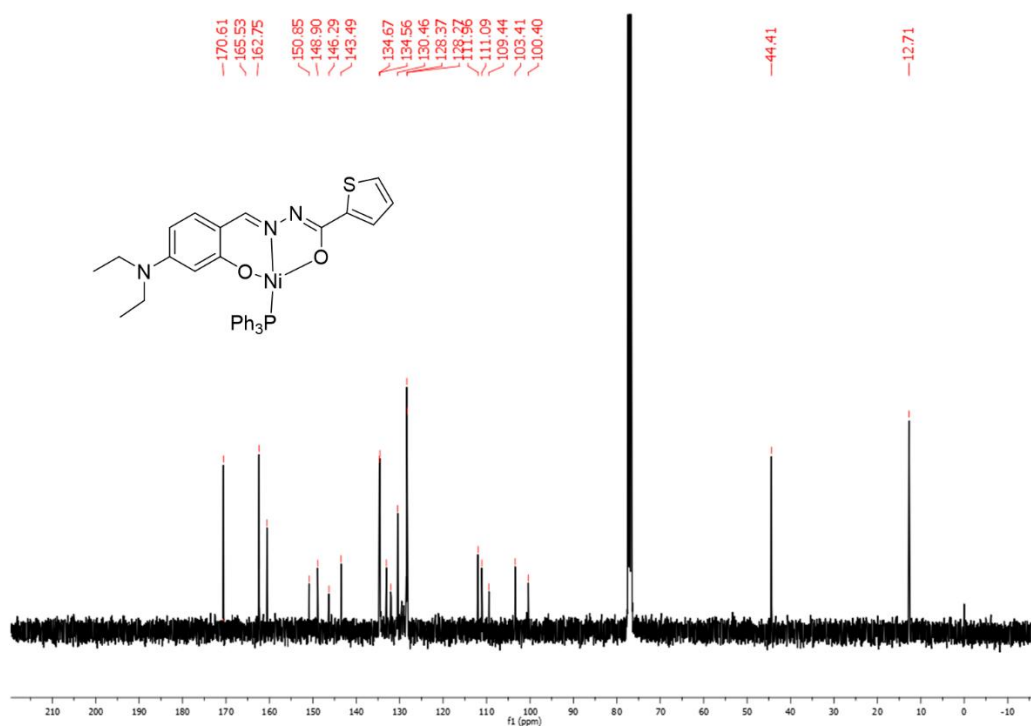

Figure S5. <sup>13</sup>C{<sup>1</sup>H} NMR spectrum of complex C1 in CDCl<sub>3</sub> (100 MHz, 293 K).

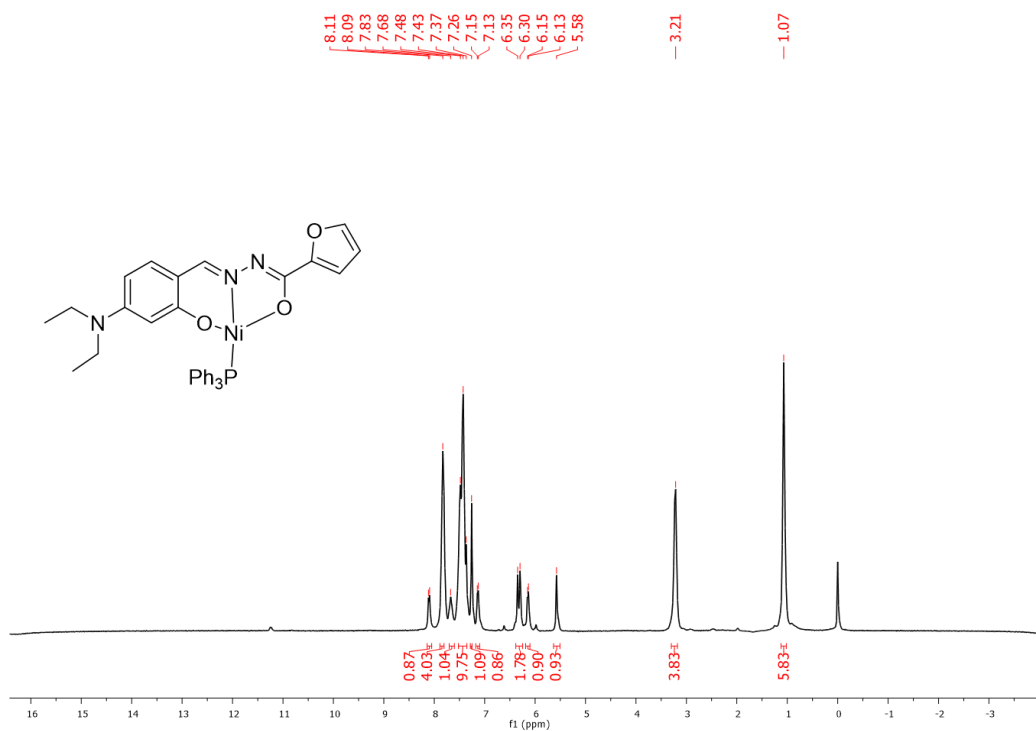

Figure S6. <sup>1</sup>H NMR spectrum of complex C2 in CDCl<sub>3</sub> (400 MHz, 293 K).

# Supporting Information

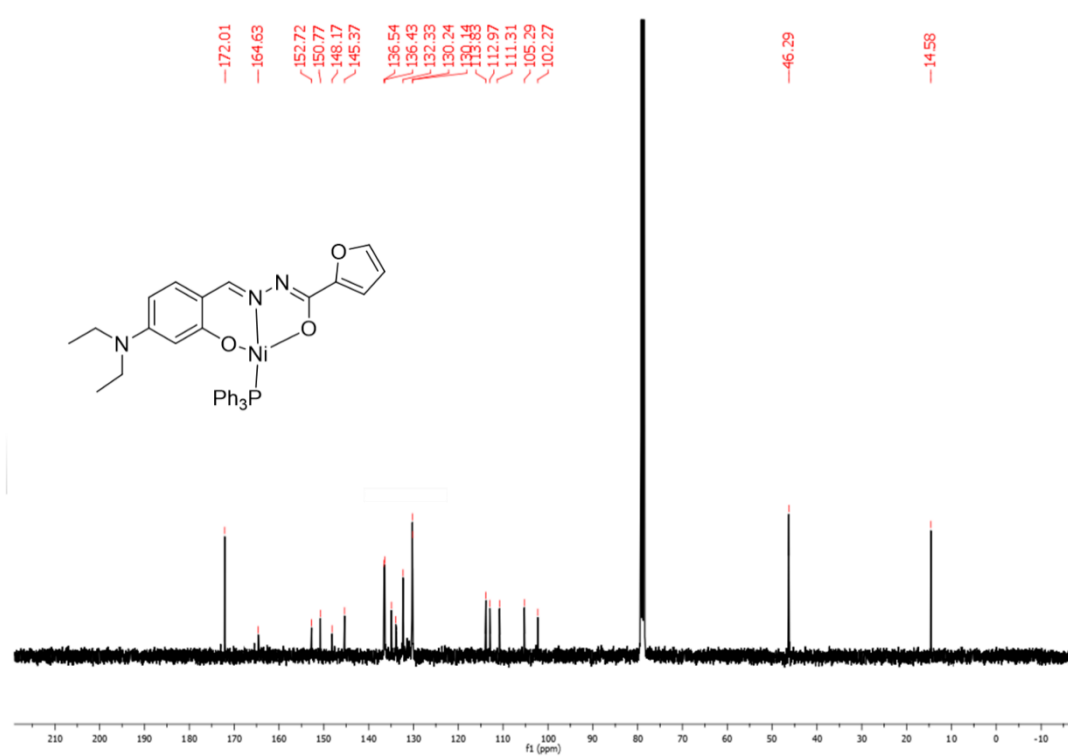

Figure S7. <sup>13</sup>C{<sup>1</sup>H} NMR spectrum of complex C2 in CDCl<sub>3</sub> (100 MHz, 293 K).

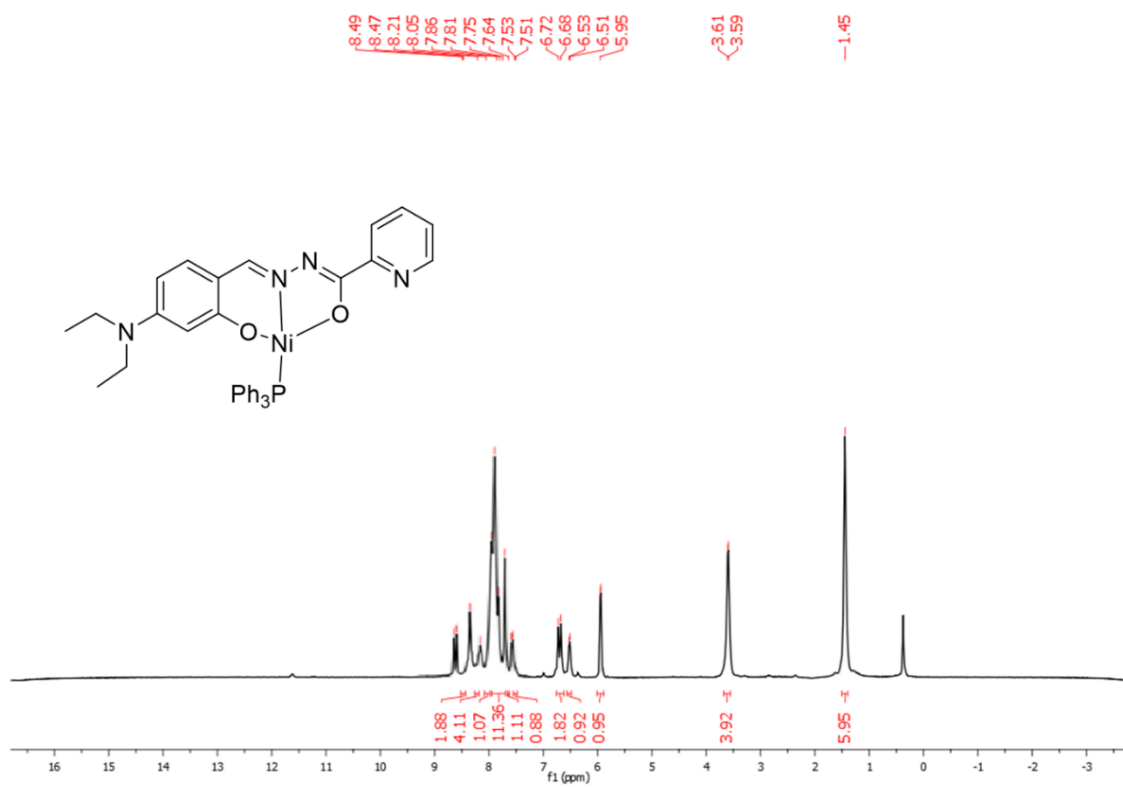

Figure S8. <sup>1</sup>H NMR spectrum of complex C3 in CDCl<sub>3</sub> (400 MHz, 293 K).

# Supporting Information

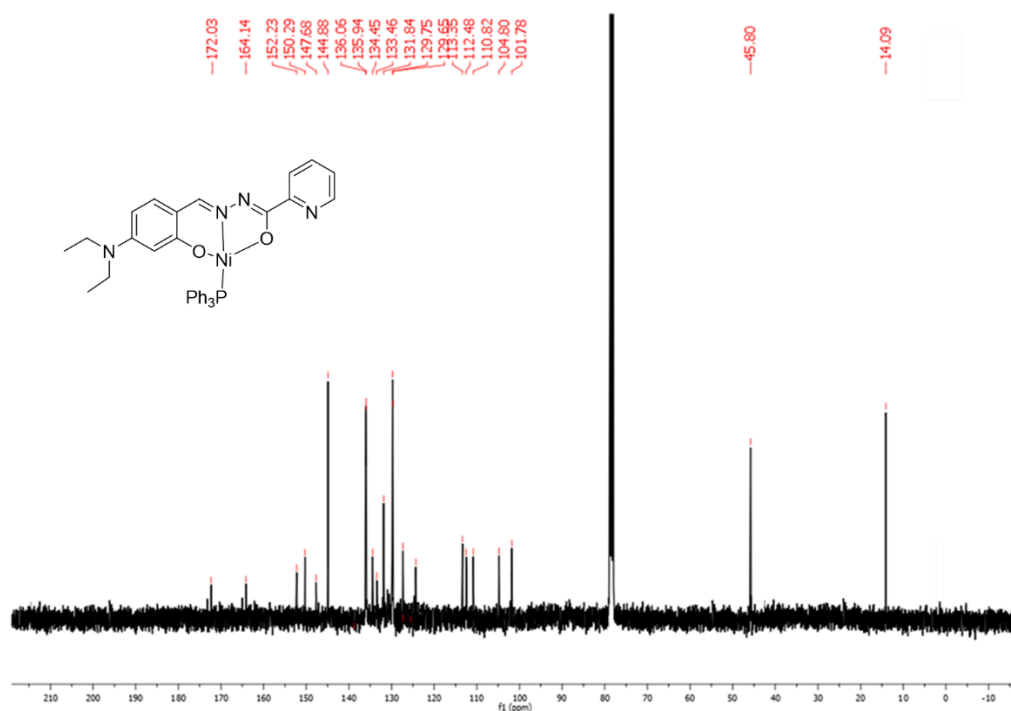

Figure S9.  $^{13}\text{C}\{^1\text{H}\}$  NMR spectrum of complex C3 in  $\text{CDCl}_3$  (100 MHz, 293 K).

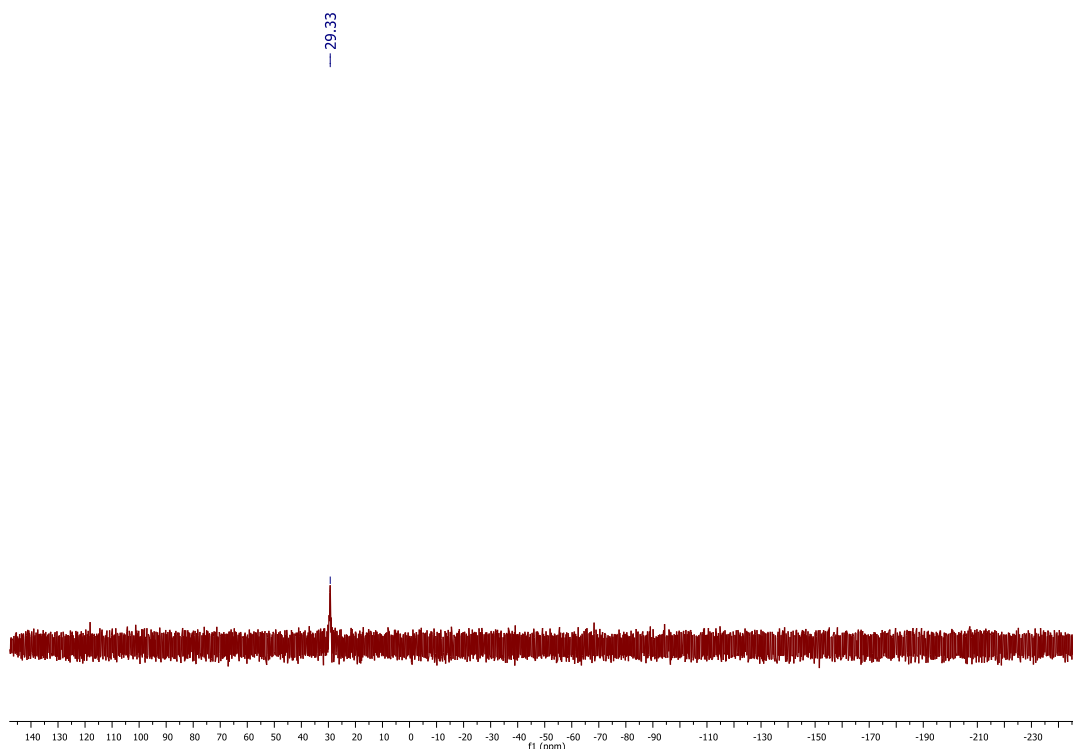

Figure S10.  $^{31}\text{P}\{^1\text{H}\}$  NMR spectrum of complex C1 in  $\text{CDCl}_3$  (162 MHz, 293 K).

## Supporting Information

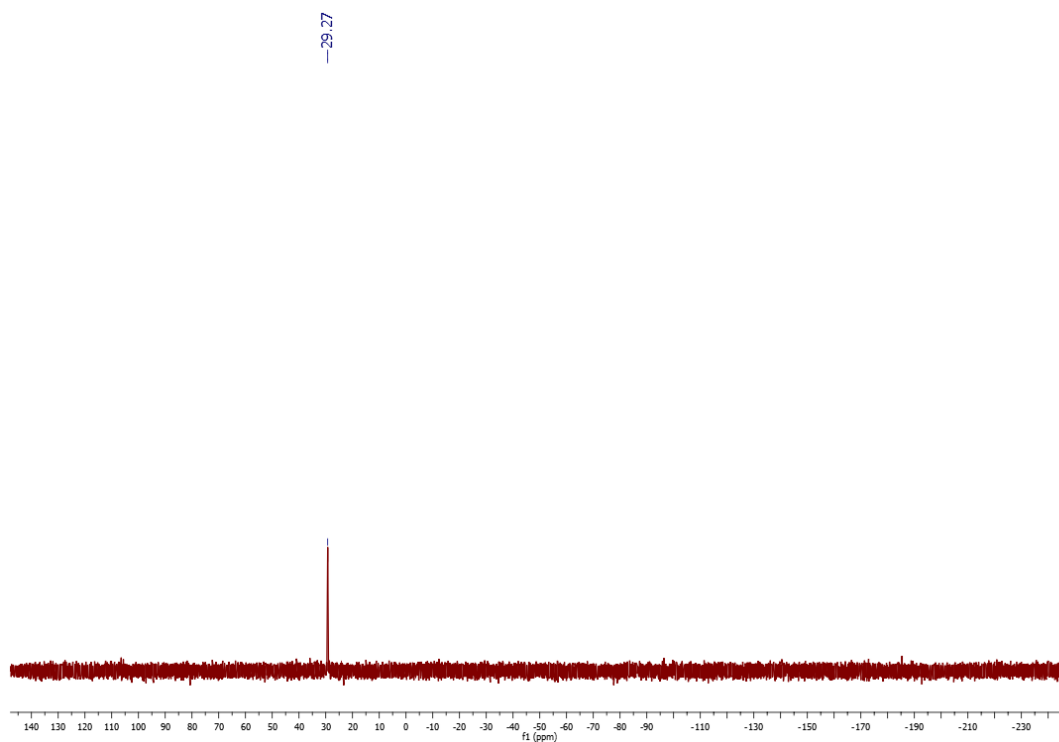

**Figure S11.**  $^{31}\text{P}\{^1\text{H}\}$  NMR spectrum of complex C2 in  $\text{CDCl}_3$  (162 MHz, 293 K).

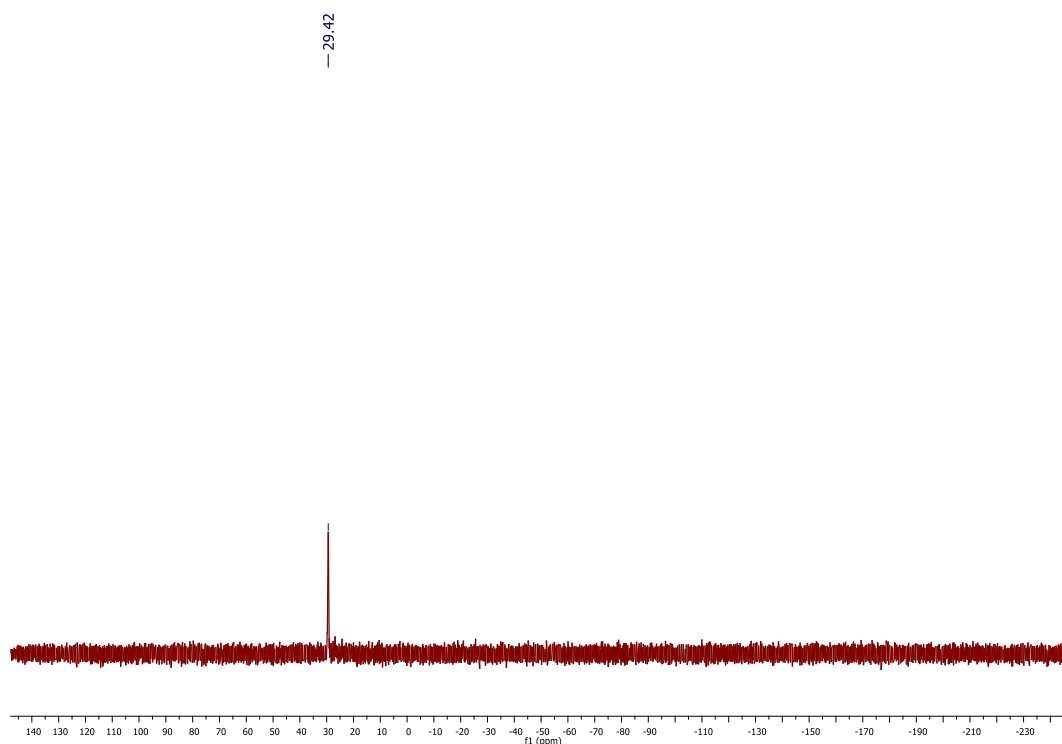

**Figure S12.**  $^{31}\text{P}\{^1\text{H}\}$  NMR spectrum of complex C3 in  $\text{CDCl}_3$  (162 MHz, 293 K).

# Supporting Information

## 5. HRMS spectra of Ni(II) complexes C1-C3

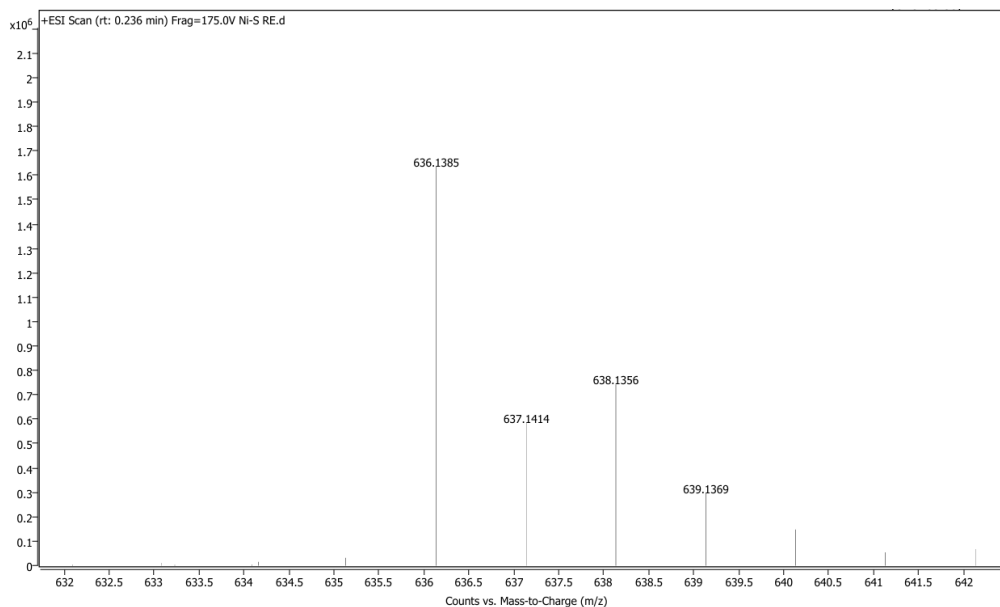

**Figure S13.** HRMS spectrum of complex **C1**, Calculated: 636.1385 [M]<sup>+</sup>; Found: 636.1385 [M]<sup>+</sup>.

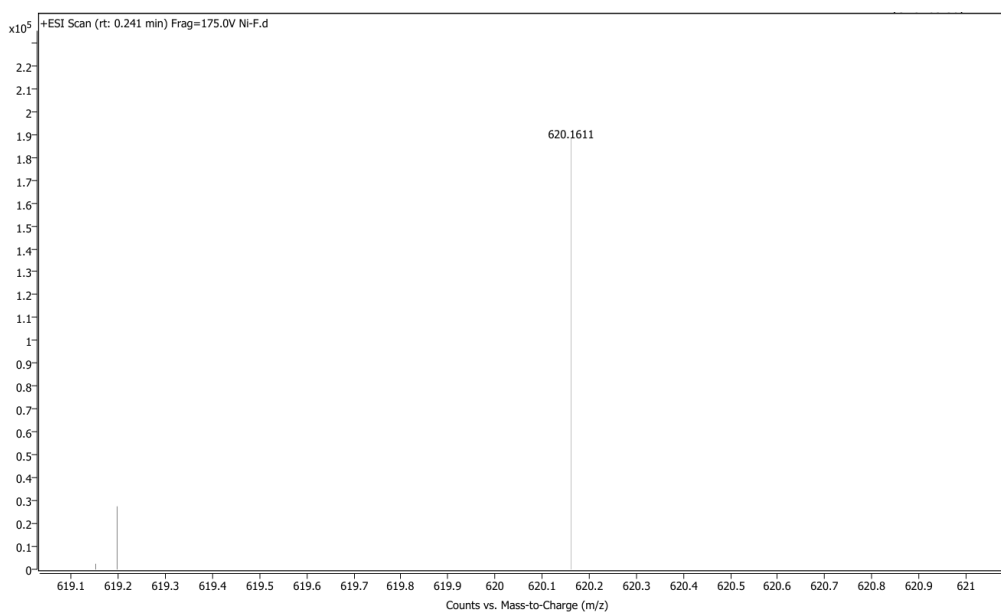

**Figure S14.** HRMS spectrum of complex **C2**, Calculated: 620.1613 [M]<sup>+</sup>; Found: 620.1611 [M]<sup>+</sup>.

## Supporting Information

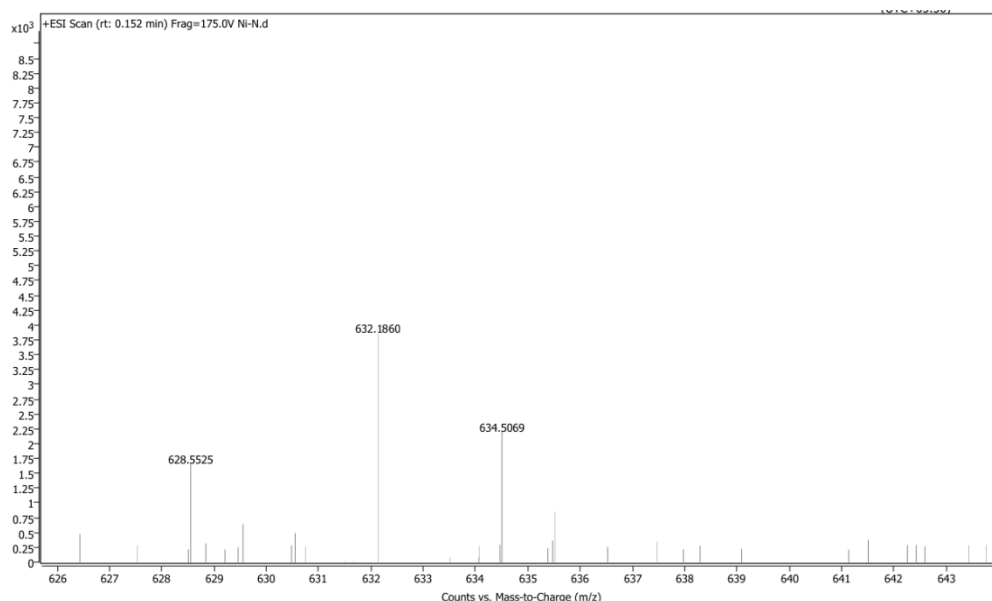

**Figure S15.** HRMS spectrum of complex **C3**, Calculated: 632.1851 [M+H]<sup>+</sup>; Found: 632.1860 [M+H]<sup>+</sup>

### 6. Characterisation data of products:

2-amino-7,7-dimethyl-5-oxo-4-phenyl-5,6,7,8-tetrahydro-4H-chromene-3-carbonitrile (**4a**)<sup>8</sup>:  
white solid (yield: 257 mg, 91%). <sup>1</sup>H NMR (400 MHz, DMSO) δ 7.28 (t, 2H), 7.19 – 7.13 (m, 3H), 6.99 (s, 2H), 4.17 (s, 1H), 2.51 (s, 2H), 2.25 (d, *J* = 7.2 Hz, 1H), 2.10 (d, *J* = 7.2 Hz, 1H), 1.00 (d, *J* = 7.2 Hz, 6H). <sup>13</sup>C NMR (100 MHz, DMSO) δ 195.5, 162.4, 158.4, 144.7, 128.2, 127.1, 126.5, 119.6, 112.7, 58.2, 49.9, 35.5, 31.7, 28.3, 26.7.

2-amino-7,7-dimethyl-5-oxo-4-(p-tolyl)-5,6,7,8-tetrahydro-4H-chromene-3-carbonitrile (**4b**)<sup>8</sup>:  
white solid (yield: 277 mg, 62%). <sup>1</sup>H NMR (400 MHz, DMSO) δ 7.01 (t, 2H), 6.87 (d, *J* = 7.2 Hz, 2H), 6.72 (s, 2H), 3.90 (s, 1H), 3.09 (s, 3H), 2.24 (s, 2H), 1.98 (d, *J* = 7.2 Hz, 1H), 1.83 (d, *J* = 7.2 Hz, 1H), 0.75 (d, *J* = 7.2 Hz, 6H). <sup>13</sup>C NMR (100 MHz, DMSO) δ 196.1, 164.0, 159.1, 144.0, 132.3, 131.7, 131.4, 130.0, 128.6, 119.5, 111.4, 32.2, 28.7, 27.3.

2-amino-7,7-dimethyl-5-oxo-4-(m-tolyl)-5,6,7,8-tetrahydro-4H-chromene-3-carbonitrile (**4c**)<sup>9</sup>:  
white solid (yield: 255 mg, 83%). <sup>1</sup>H NMR (400 MHz, DMSO) δ 7.29 (d, *J* = 7.2 Hz, 2H), 7.16 (d, *J* = 7.2 Hz, 2H), 7.01 (s, 2H), 4.19 (s, 1H), 2.52 (s, 2H), 2.28 (s, 2H), 1.61 (s, 3H), 1.01 (d, *J* = 7.2 Hz, 6H). <sup>13</sup>C NMR (100 MHz, DMSO) δ 195.3, 165.2, 158.2, 144.4, 128.0, 126.9, 119.4, 112.5, 58.0, 49.7, 47.4, 35.3, 31.5, 28.1, 26.5.

2-amino-4-(4-methoxyphenyl)-7,7-dimethyl-5-oxo-5,6,7,8-tetrahydro-4H-chromene-3-carbonitrile (**4d**)<sup>8</sup>:  
white solid (yield: 288 mg, 89%). <sup>1</sup>H NMR (400 MHz, DMSO) δ 7.05 (d, *J* = 7.2 Hz, 2H), 6.92 (d, *J* = 7.2 Hz, 2H), 6.77 (s, 2H), 3.95 (s, 1H), 3.31 (s, 3H), 2.28 (s, 2H), 1.90 (s, 2H), 0.77 (d, *J* = 7.2 Hz, 6H). <sup>13</sup>C NMR (100 MHz, DMSO) δ 196.1, 162.8, 158.9, 141.9, 136.5, 128.3, 126.4, 120.1, 113.0, 58.6, 50.4, 35.57, 32.2, 28.8, 27.2, 15.1.

2-amino-4-(2,3-dimethoxyphenyl)-7,7-dimethyl-5-oxo-5,6,7,8-tetrahydro-4H-chromene-3-carbonitrile (**4e**)<sup>9</sup>:  
white solid (yield: 286 mg, 81%). <sup>1</sup>H NMR (400 MHz, DMSO) δ 7.03 (d, *J* = 7.2 Hz, 1H), 6.90 (d, *J* = 7.2 Hz, 2H), 6.75 (s, 2H), 4.07 (s, 1H), 3.49 (s, 3H), 3.29 (s, 2H), 2.27 (s, 2H), 1.88 (s, 2H), 0.75 (d, *J* = 7.2 Hz,

## Supporting Information

6H).  $^{13}\text{C}$  NMR (100 MHz, DMSO)  $\delta$  196.3, 163.2, 159.2, 145.4, 129.0, 127.9, 127.3, 120.4, 113.5, 59.0, 55.5, 50.7, 46.3, 36.3, 32.5, 29.1, 27.5.

2-amino-7,7-dimethyl-5-oxo-4-(2,3,4-trimethoxyphenyl)-5,6,7,8-tetrahydro-4H-chromene-3-carbonitrile (**4f**):

white solid (yield:303 mg, 79%).  $^1\text{H}$  NMR (400 MHz, DMSO)  $\delta$  6.45 (s, 2H), 4.76 (s, 2H), 4.35 (s, 1H), 3.83 (d,  $J = 7.2$  Hz, 9H), 2.48 (s, 2H), 2.27 (s, 2H), 1.12 (d,  $J = 7.2$  Hz, 6H).  $^{13}\text{C}$  NMR (100 MHz, DMSO)  $\delta$  196.0, 161.8, 157.6, 153.2, 139.0, 136.9, 118.8, 113.8, 104.6, 63.0, 60.7, 56.1, 50.6, 40.7, 35.7, 32.1, 29.1, 27.3. HRMS (ESI)  $m/z$ :  $[\text{M}+\text{H}]^+$  calculated for  $\text{C}_{21}\text{H}_{24}\text{N}_2\text{O}_5$ : 385.1763; observed: 385.1763.

2-amino-4-(4-chlorophenyl)-7,7-dimethyl-5-oxo-5,6,7,8-tetrahydro-4H-chromene-3-carbonitrile (**4g**)<sup>8</sup>:

white solid (yield:276 mg, 84%).  $^1\text{H}$  NMR (400 MHz, DMSO)  $\delta$  7.16 – 7.12 (m, 2H), 7.03 (t, 2H), 6.88 (s, 2H), 4.14 (s, 1H), 2.45 (s, 2H), 2.19 (d,  $J = 7.2$  Hz, 1H), 2.05 (d,  $J = 7.2$  Hz, 1H), 1.86 (s, 1H) 0.92 (d,  $J = 7.2$  Hz, 6H).  $^{13}\text{C}$  NMR (100 MHz, DMSO)  $\delta$  196.4, 162.8, 162.0, 159.6, 158.4, 140.6, 128.9, 128.8, 119.6, 115.0, 114.8, 112.4, 111.7, 58.2, 49.8, 34.7, 31.6, 28.1, 26.6.

2-amino-4-(3-chlorophenyl)-7,7-dimethyl-5-oxo-5,6,7,8-tetrahydro-4H-chromene-3-carbonitrile (**4h**)<sup>9</sup>:

white solid (yield:233 mg, 71%).  $^1\text{H}$  NMR (400 MHz, DMSO)  $\delta$  7.16 (t, 4H), 6.93 (d,  $J = 7.2$  Hz, 2H), 5.39 (s, 1H), 2.36 – 2.25 (m, 4H), 1.08 (d,  $J = 7.2$  Hz, 6H).  $^{13}\text{C}$  NMR (100 MHz, DMSO)  $\delta$  190.7, 189.4, 136.7, 131.5, 128.3, 128.2, 115.3, 47.0, 46.4, 32.4, 31.4, 29.7, 29.6, 27.4.

2-amino-4-(2,5-dichlorophenyl)-7,7-dimethyl-5-oxo-5,6,7,8-tetrahydro-4H-chromene-3-carbonitrile (**4i**)<sup>9</sup>:

white solid (yield:239 mg, 66%).  $^1\text{H}$  NMR (400 MHz, DMSO)  $\delta$  7.30 (d,  $J = 7.2$  Hz, 4H), 7.08 (d,  $J = 7.2$  Hz, 2H), 5.54 (s, 1H), 2.76 (d,  $J = 7.2$  Hz, 2H), 2.38 (d,  $J = 7.2$  Hz, 2H), 1.22 (d,  $J = 7.2$  Hz, 6H).  $^{13}\text{C}$  NMR (100 MHz, DMSO)  $\delta$  163.5, 158.6, 143.5, 131.8, 131.1, 130.8, 129.5, 128.1, 119.0, 110.9, 55.9, 4.8, 31.7, 28.2, 26.7.

2-amino-4-(4-cyanophenyl)-7,7-dimethyl-5-oxo-5,6,7,8-tetrahydro-4H-chromene-3-carbonitrile (**4j**):

white solid (yield:204 mg, 64%).  $^1\text{H}$  NMR (400 MHz, DMSO)  $\delta$  7.42 (d,  $J = 7.2$  Hz, 1H), 7.30 (t, 1H), 7.22 (d,  $J = 7.2$  Hz, 1H), 7.14 (s, 1H), 4.69 (s, 1H), 3.38 (s, 2H), 2.54 (s, 2H), 2.25 (d,  $J = 7.2$  Hz, 1H), 2.11 (d,  $J = 7.2$  Hz, 1H), 1.02 (d,  $J = 7.2$  Hz, 6H).  $^{13}\text{C}$  NMR (100 MHz, DMSO)  $\delta$  165.6, 163.5, 158.6, 143.5, 131.8, 131.1, 130.8, 129.5, 128.1, 119.0, 110.9, 55.9, 49.8, 31.7, 28.2, 26.7. HRMS (ESI)  $m/z$ :  $[\text{M}-\text{H}]^+$  calculated for  $\text{C}_{19}\text{H}_{17}\text{N}_3\text{O}_2$ : 318.1243; observed: 318.1249.

N-(4-(2-amino-3-cyano-7,7-dimethyl-5-oxo-5,6,7,8-tetrahydro-4H-chromen-4-yl)phenyl)acetamide (**4k**):

white solid (yield:256 mg, 73%).  $^1\text{H}$  NMR (400 MHz, DMSO)  $\delta$  9.89 (s, 1H), 7.45 (d,  $J = 7.2$  Hz, 2H), 7.05 (d,  $J = 7.2$  Hz, 1H), 6.98 (s, 1H), 4.11 (s, 1H), 2.50 (d,  $J = 7.2$  Hz, 3H), 2.26 – 2.07 (m, 2H), 2.01 (s, 3H), 0.99 (d,  $J = 7.2$  Hz, 6H).  $^{13}\text{C}$  NMR (100 MHz, DMSO)  $\delta$  195.6, 168.0, 162.2, 158.3, 139.3, 137.7, 127.3, 119.7, 119.0, 112.7, 58.2, 49.9, 34.9, 31.7, 28.3, 26.7, 23.8. HRMS (ESI)  $m/z$ :  $[\text{M}+\text{H}]^+$  calculated for  $\text{C}_{20}\text{H}_{21}\text{N}_3\text{O}_3$ : 352.4138; observed: 352.4136.

4-([1,1'-biphenyl]-4-yl)-2-amino-7,7-dimethyl-5-oxo-5,6,7,8-tetrahydro-4H-chromene-3-carbonitrile (**4l**):

white solid (yield:240 mg, 65%).  $^1\text{H}$  NMR (400 MHz, DMSO)  $\delta$  8.41 (d,  $J = 7.2$  Hz, 1H), 7.93 (d,  $J = 7.2$  Hz, 1H), 7.79 (d,  $J = 7.2$  Hz, 1H), 7.61 – 7.55 (m, 2H), 7.53 – 7.45 (m, 1H), 7.28 (d,  $J = 7.2$  Hz, 1H), 7.02, (s, 2H), 5.20 (s, 1H), 2.55 (d,  $J = 7.2$  Hz, 2H), 2.26, (d,  $J = 7.2$  Hz, 1H), 2.09 (d,  $J = 7.2$  Hz, 1H), 1.03 (d,  $J = 7.2$  Hz, 6H).  $^{13}\text{C}$  NMR (100 MHz, DMSO)  $\delta$  195.7, 195.7, 162.7, 158.4, 133.3, 130.7, 128.3, 126.9, 125.8, 125.6, 125.2, 123.6, 119.6, 119.6, 113.4, 58.9, 58.8, 50.0, 31.7, 28.3, 26.9. HRMS (ESI)  $m/z$ :  $[\text{M}]^+$  calculated for  $\text{C}_{24}\text{H}_{22}\text{N}_2\text{O}_2$ : 370.1681; observed: 370.1680.

## Supporting Information

### 2-amino-5-oxo-4-phenyl-4H,5H-pyrano[3,2-c]chromene-3-carbonitrile (**5a**)<sup>8</sup>:

white solid (yield:268 mg, 85%). <sup>1</sup>H NMR (400 MHz, DMSO) δ 8.45 (s, 1H), 7.88 (d, *J* = 7.2 Hz, 2H), 7.44 (d, *J* = 7.2 Hz, 2H), 7.37 (d, *J* = 7.2 Hz, 3H), 7.06 (d, *J* = 7.2 Hz, 3H), 4.41 (s, 1H). <sup>13</sup>C NMR (100 MHz, DMSO) δ 164.7, 159.5, 157.9, 153.3, 152.0, 143.2, 128.4, 127.9, 12.5, 126.6, 123.8, 122.4, 103.9, 57.9.

### 2-amino-5-oxo-4-(p-tolyl)-4H,5H-pyrano[3,2-c]chromene-3-carbonitrile (**5b**)<sup>8</sup>:

white solid (yield:277 mg, 84%). <sup>1</sup>H NMR (400 MHz, DMSO) δ 8.41 (s, 1H), 7.88 – 7.82 (m, 2H), 7.40 (d, *J* = 7.2 Hz, 2H), 7.33 (d, *J* = 7.2 Hz, 3H), 7.10 (s, 1H), 7.00 (s, 2H), 4.37 (s, 1H), 2.23 (d, *J* = 7.2 Hz, 3H). <sup>13</sup>C NMR (100 MHz, DMSO) δ 165.7, 164.8, 161.2, 152.1, 145.6, 130.6, 130.0, 129.0, 128.6, 128.5, 127.4, 126.5, 123.8, 115.7, 104.0, 79.8, 21.3.

### 2-amino-5-oxo-4-(m-tolyl)-4H,5H-pyrano[3,2-c]chromene-3-carbonitrile (**5c**)<sup>9</sup>:

white solid (yield:237 mg, 72%). <sup>1</sup>H NMR (400 MHz, DMSO) δ 8.23 (s, 1H), 7.65 (d, *J* = 7.2 Hz, 2H), 7.22 (d, *J* = 7.2 Hz, 2H), 7.15 (d, *J* = 7.2 Hz, 2H), 6.92 (s, 1H), 6.82 (s, 2H), 4.19 (s, 1H), 2.53 (s, 3H). <sup>13</sup>C NMR (100 MHz, DMSO) δ 165.7, 164.8, 131.2, 152.1, 145.6, 130.6, 130.0, 129.0, 128.6, 128.5, 127.4, 126.5, 123.8, 115.7, 104.0, 79.8, 21.3.

### 2-amino-4-(4-methoxyphenyl)-5-oxo-4H,5H-pyrano[3,2-c]chromene-3-carbonitrile (**5d**)<sup>8</sup>:

white solid (yield:284 mg, 82%). <sup>1</sup>H NMR (400 MHz, DMSO) δ 8.41 (s, 2H), 7.83 (d, *J* = 7.2 Hz, 2H), 7.39 (d, *J* = 7.2 Hz, 2H), 7.32 (d, *J* = 7.2 Hz, 2H), 7.03 (d, *J* = 7.2 Hz, 2H), 4.18 (s, 1H), 3.70 (s, 3H). <sup>13</sup>C NMR (100 MHz, DMSO) δ 163.5, 158.3, 156.7, 152.1, 150.9, 142.0, 127.2, 26.3, 125.4, 123.4, 122.6, 121.2, 115.3, 114.6, 102.7, 56.7, 49.7.

### 2-amino-4-(2,3-dimethoxyphenyl)-5-oxo-4H,5H-pyrano[3,2-c]chromene-3-carbonitrile (**5e**)<sup>9</sup>:

white solid (yield:293 mg, 78%). <sup>1</sup>H NMR (400 MHz, DMSO) δ 8.45 (s, 2H), 7.88 – 7.43 (m, 2H), 7.37 (d, *J* = 7.2 Hz, 2H), 7.06 (d, *J* = 7.2 Hz, 3H), 3.86 (s, 1H), 3.65 (s, 3H), 3.38 (s, 3H). <sup>13</sup>C NMR (100 MHz, DMSO) δ 167.3, 166.4, 132.8, 153.7, 147.2, 132.2, 131.6, 130.6, 130.2, 130.1, 129.0, 128.1, 125.4, 125.4, 117.3, 105.6, 81.4, 31.6, 22.9.

### 2-amino-5-oxo-4-(2,3,4-trimethoxyphenyl)-4H,5H-pyrano[3,2-c]chromene-3-carbonitrile (**5f**)<sup>9</sup>:

white solid (yield:312 mg, 77%). <sup>1</sup>H NMR (400 MHz, DMSO) δ 8.36 (s, 2H), 7.79 (d, *J* = 7.2 Hz, 2H), 7.36 – 7.27 (m, 2H), 7.98 (d, *J* = 7.2 Hz, 2H), 3.80 (s, 1H), 3.71 – 3.54 (m, 9H). <sup>13</sup>C NMR (100 MHz, DMSO) δ 159.5, 158.0, 153.4, 125.7, 152.0, 136.6, 132.6, 124.3, 122.5, 119.1, 116.3, 112.8, 104.8, 103.6, 59.8, 57.8, 55.7. HRMS (ESI) *m/z*: [M+H]<sup>+</sup> calculated for C<sub>22</sub>H<sub>18</sub>N<sub>2</sub>O<sub>6</sub>: 407.1243; observed: 407.1244.

### 2-amino-4-(4-chlorophenyl)-5-oxo-4H,5H-pyrano[3,2-c]chromene-3-carbonitrile (**5g**)<sup>8</sup>:

white solid (yield:263 mg, 75%). <sup>1</sup>H NMR (400 MHz, DMSO) δ 8.41 (s, 2H), 7.83 (d, *J* = 7.2 Hz, 2H), 7.39 (d, *J* = 7.2 Hz, 2H), 7.32 (d, *J* = 7.2 Hz, 2H), 7.02 (d, *J* = 7.2 Hz, 2H), 4.37 (s, 1H). <sup>13</sup>C NMR (100 MHz, DMSO) δ 164.4, 162.1, 160.0, 156.4, 151.0, 147.2, 139.0, 132.0, 129.5, 128.3, 125.5, 123.7, 120.9, 119.9, 113.9, 112.9, 82.2, 42.9.

### 2-amino-4-(4-chlorophenyl)-5-oxo-4H,5H-pyrano[3,2-c]chromene-3-carbonitrile (**5h**)<sup>9</sup>:

white solid (yield:213 mg, 61%). <sup>1</sup>H NMR (400 MHz, DMSO) δ 8.40 (s, 2H), 7.83 (d, *J* = 7.2 Hz, 2H), 7.39 (d, *J* = 7.2 Hz, 2H), 7.32 (d, *J* = 7.2 Hz, 2H), 7.02 (d, *J* = 7.2 Hz, 2H), 4.18 (s, 1H). <sup>13</sup>C NMR (100 MHz, DMSO) δ 165.7, 164.8, 161.2, 152.1, 145.6, 130.6, 130.0, 129.0, 128.5, 127.4, 126.5, 123.8, 115.7, 104.0, 79.8, 58.1.

### 2-amino-4-(2,5-dichlorophenyl)-5-oxo-4H,5H-pyrano[3,2-c]chromene-3-carbonitrile (**5i**)<sup>9</sup>:

white solid (yield:243 mg, 63%). <sup>1</sup>H NMR (400 MHz, DMSO) δ 7.92 (d, *J* = 7.2 Hz, 1H), 7.73 (t, 1H), 7.53 – 7.46 (m, 6H), 7.37 – 7.35 (m, 1H), 5.00 (s, 1H). <sup>13</sup>C NMR (100 MHz, DMSO) δ 159.4, 158.1, 154.3, 152.2, 133.0, 132.1, 131.2, 131.1, 128.7, 124.6, 122.5, 118.6, 116.5, 112.8, 101.9, 55.7.

## Supporting Information

N-(4-(2-amino-3-cyano-5-oxo-4H,5H-pyrano[3,2-c]chromen-4-yl)phenyl)acetamide (**5j**):

white solid (yield:205 mg, 60%).  $^1\text{H}$  NMR (400 MHz, DMSO)  $\delta$  8.06 (s, 2H), 7.81 (d,  $J = 7.2$  Hz, 2H), 7.63 (t, 2H), 7.37 (s, 2H), 7.33 (d,  $J = 7.2$  Hz, 4H), 5.60 (s, 1H).  $^{13}\text{C}$  NMR (100 MHz, DMSO)  $\delta$  165.6, 162.0, 153.4, 132.7, 123.9, 123.1, 116.3, 115.7, 90.8. HRMS (ESI)  $m/z$ : HRMS (ESI)  $m/z$ :  $[\text{M}-\text{H}]^+$  calculated for  $\text{C}_{20}\text{H}_{11}\text{N}_3\text{O}_3$ ; 340.0722; observed: 340.0733.

N-(4-(2-amino-3-cyano-5-oxo-4H,5H-pyrano[3,2-c]chromen-4-yl)phenyl)acetamide (**5k**):

white solid (yield:250 mg, 67%).  $^1\text{H}$  NMR (400 MHz, DMSO)  $\delta$  11.38 (s, 1H), 10.11 (s, 1H), 8.16 (s, 2H), 7.96 (d,  $J = 7.2$  Hz, 3H), 7.73 (d,  $J = 7.2$  Hz, 2H), 7.62 (d,  $J = 7.2$  Hz, 2H), 3.40 (s, 1H), 2.07 (s, 3H).  $^{13}\text{C}$  NMR (100 MHz, DMSO)  $\delta$  177.6, 168.5, 142.0, 140.7, 128.7, 127.9, 118.6, 24.0. HRMS (ESI)  $m/z$ :  $[\text{M}+\text{H}]^+$  calculated for  $\text{C}_{21}\text{H}_{15}\text{N}_3\text{O}_4$ ; 374.1141; observed: 374.1148.

2-amino-7,7-dimethyl-4-(naphthalen-2-yl)-5-oxo-5,6,7,8-tetrahydro-4H-chromene-3-carbonitrile (**5l**):

white solid (yield:223 mg, 67%).  $^1\text{H}$  NMR (400 MHz, DMSO)  $\delta$  8.33 (d,  $J = 7.2$  Hz, 2H), 7.85 (d,  $J = 7.2$  Hz, 2H), 7.69 (d,  $J = 7.2$  Hz, 2H), 7.49 – 7.35 (m, 2H), 7.17 (d,  $J = 7.2$  Hz, 2H), 6.93 (s, 4H), 5.10 (s, 1H).  $^{13}\text{C}$  NMR (100 MHz, DMSO)  $\delta$  194.5, 194.5, 161.5, 157.2, 132.1, 129.5, 127.1, 125.7, 124.6, 124.4, 124.3, 122.4, 118.4, 118.4, 112.2, 57.7, 57.6, 48.8. HRMS (ESI)  $m/z$ :  $[\text{M}+\text{H}]^+$  calculated for  $\text{C}_{25}\text{H}_{16}\text{N}_2\text{O}_3$ ; 393.1239; observed: 393.1224.

### NMR spectrum of the catalytic isolated products

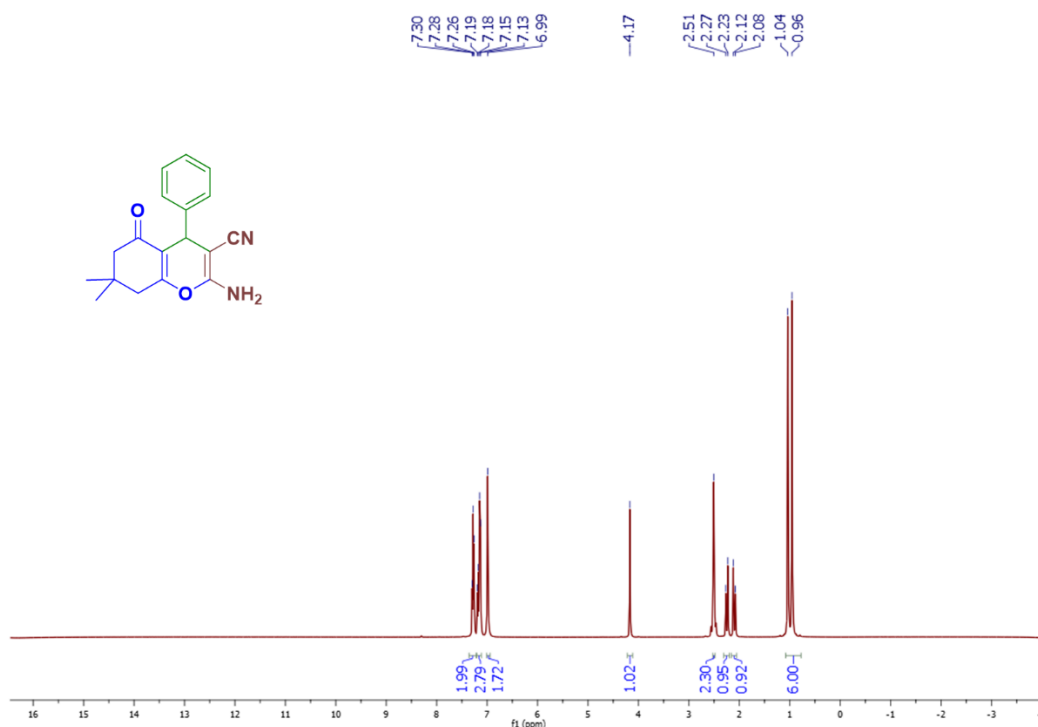

Figure S16.  $^1\text{H}$  NMR spectrum **4a** in  $\text{DMSO}-d_6$  (400 MHz, 293 K).

# Supporting Information

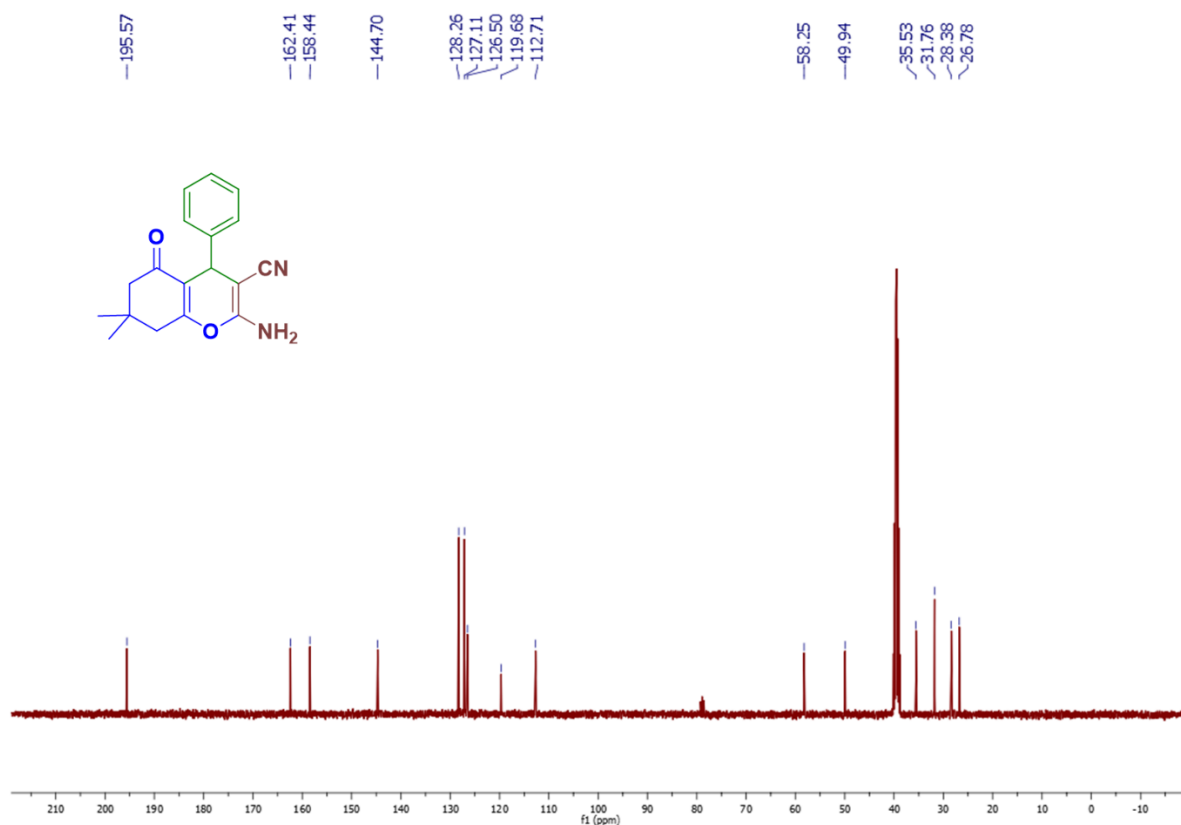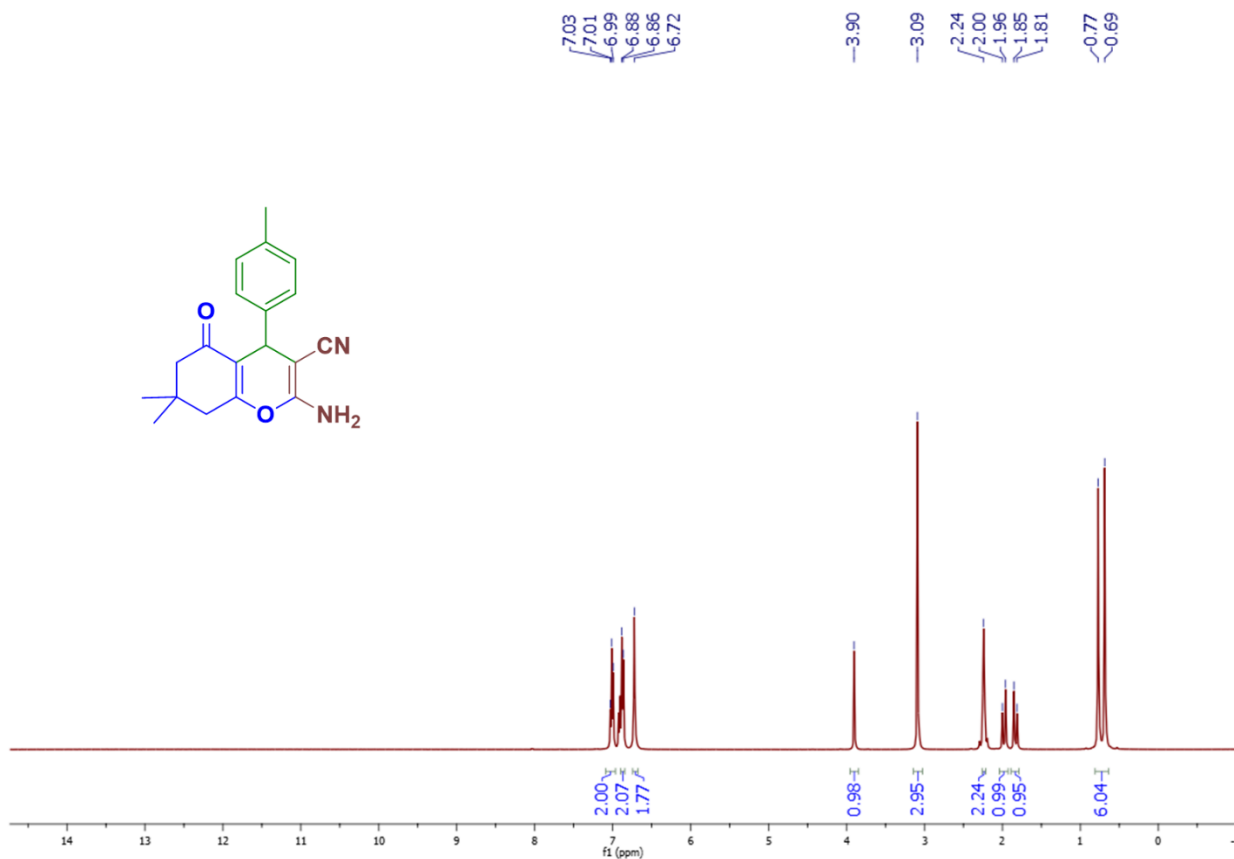

# Supporting Information

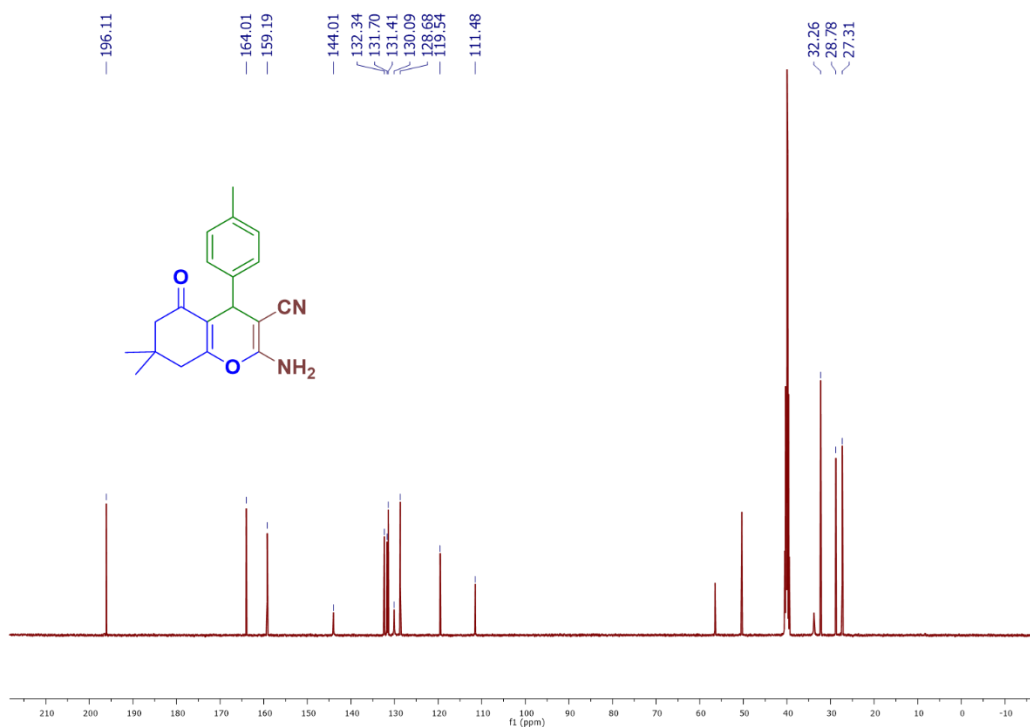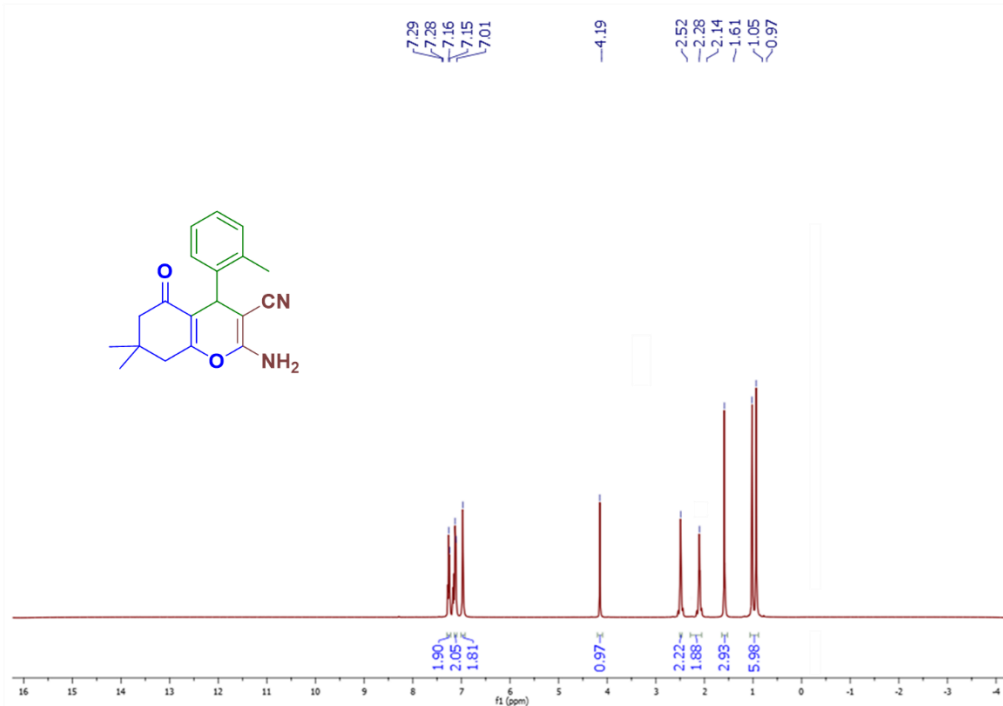

**Figure S20.**  $^1\text{H}$  NMR spectrum of **4c** in  $\text{DMSO-}d_6$  (400 MHz, 293 K).

# Supporting Information

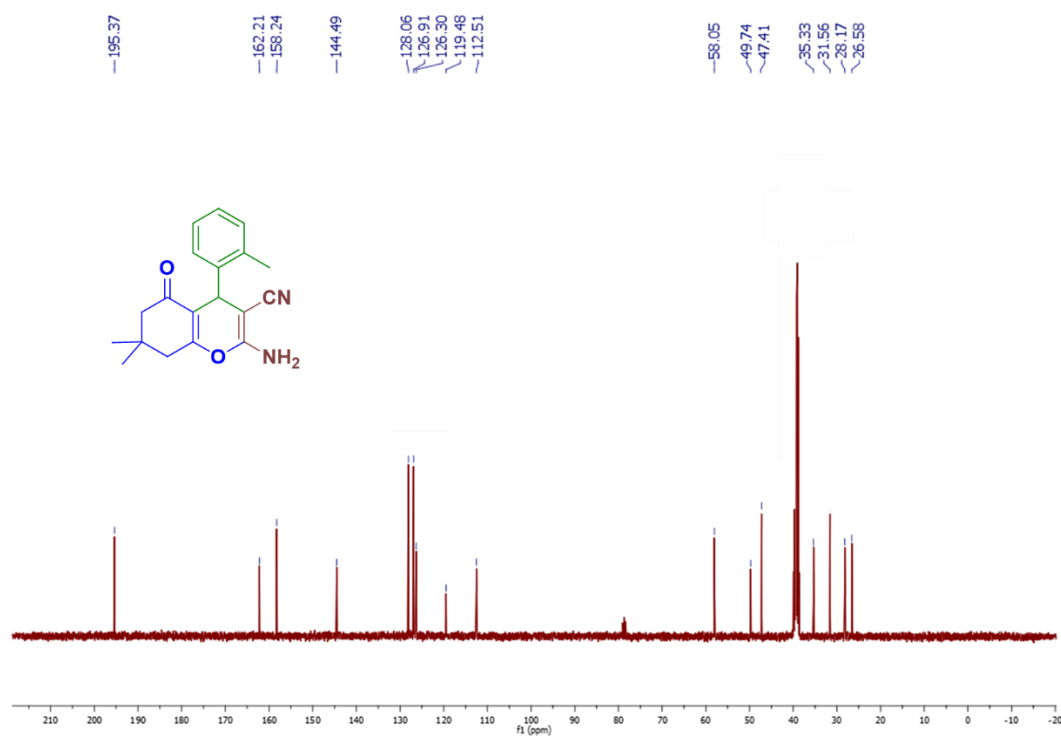

Figure S21.  $^{13}\text{C}\{^1\text{H}\}$  NMR spectrum of **4c** in  $\text{DMSO-}d_6$  (100 MHz, 293 K).

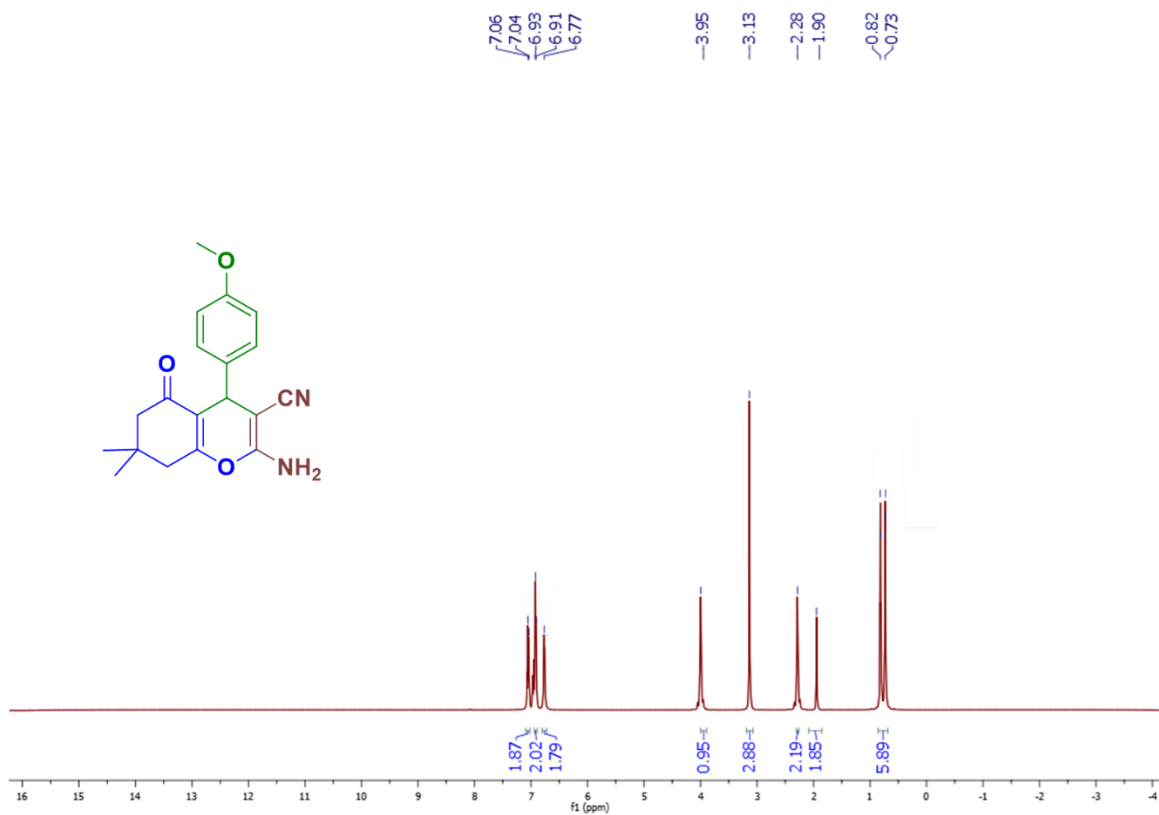

Figure S22.  $^1\text{H}$  NMR spectrum of **4d** in  $\text{DMSO-}d_6$  (400 MHz, 293 K).

# Supporting Information

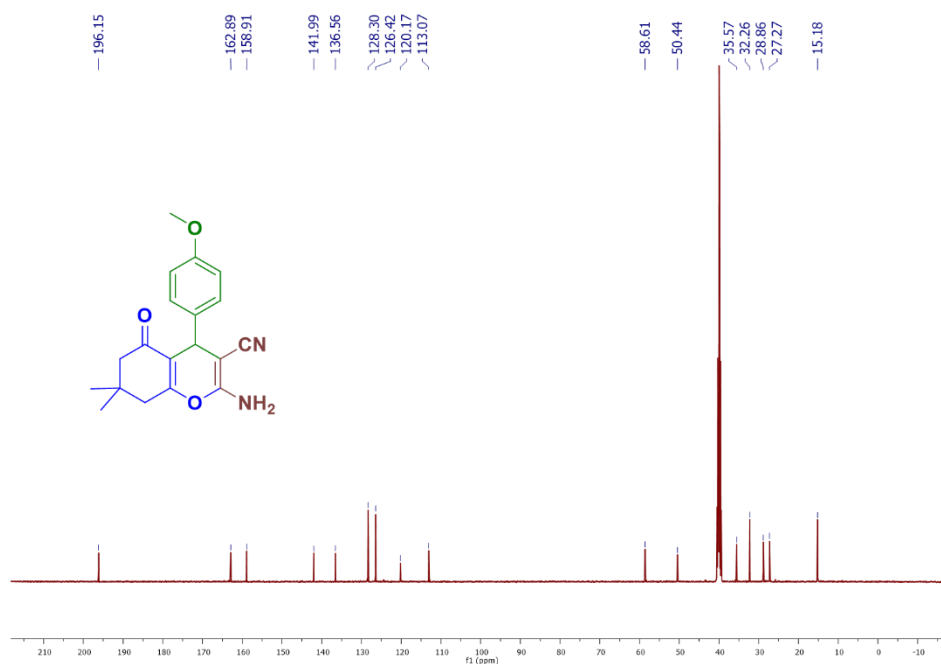

Figure S23.  $^{13}\text{C}\{^1\text{H}\}$  NMR spectrum of **4d** in  $\text{DMSO-}d_6$  (100 MHz, 293 K).

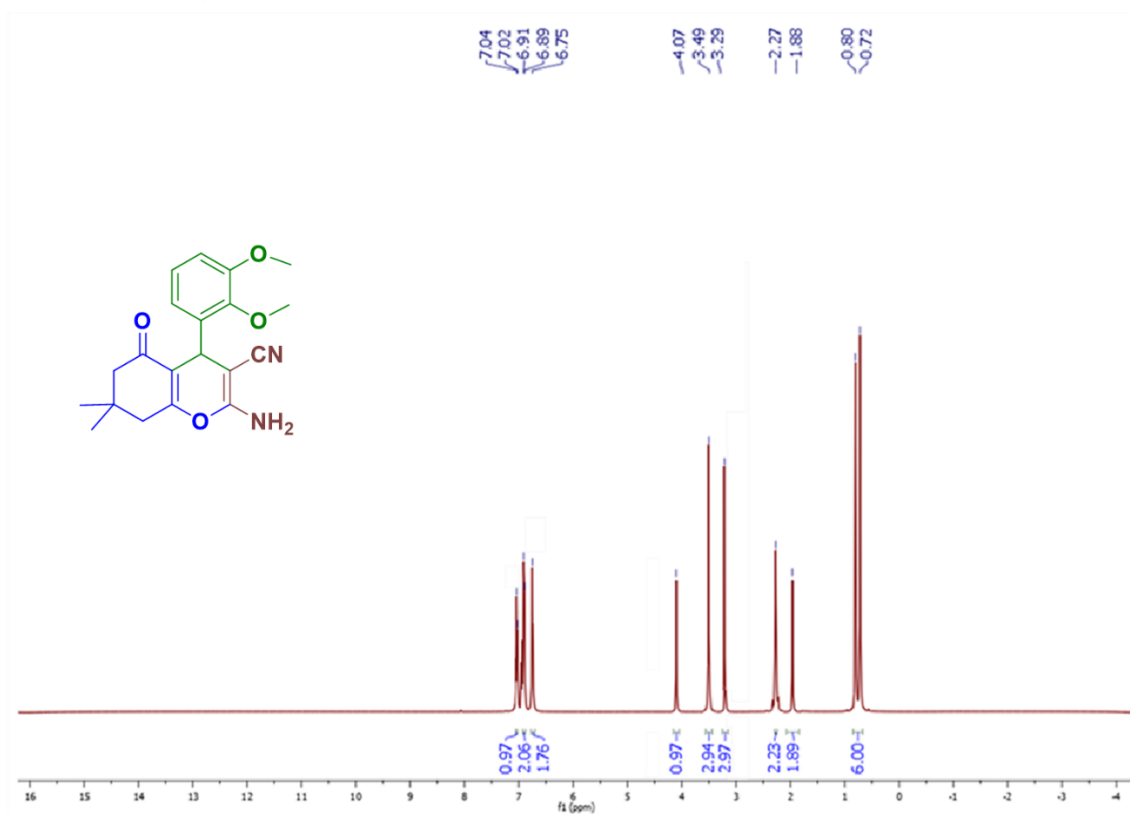

Figure S24.  $^1\text{H}$  NMR spectrum **4e** in  $\text{DMSO-}d_6$  (400 MHz, 293 K).

# Supporting Information

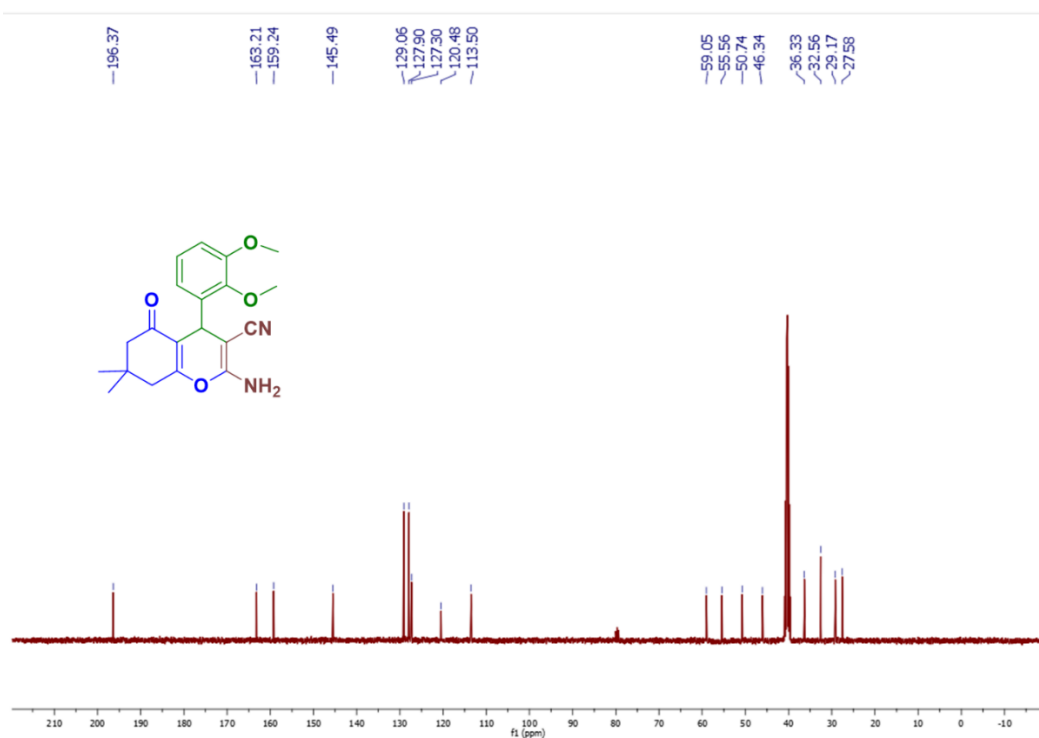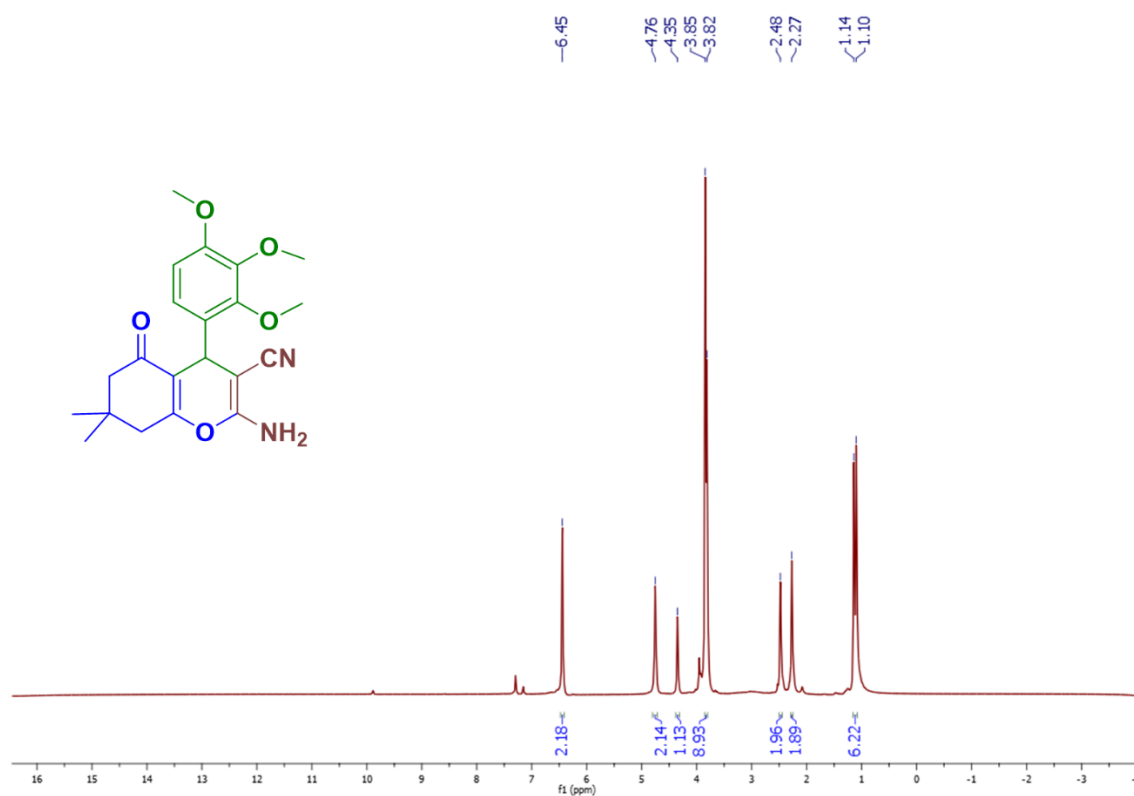

# Supporting Information

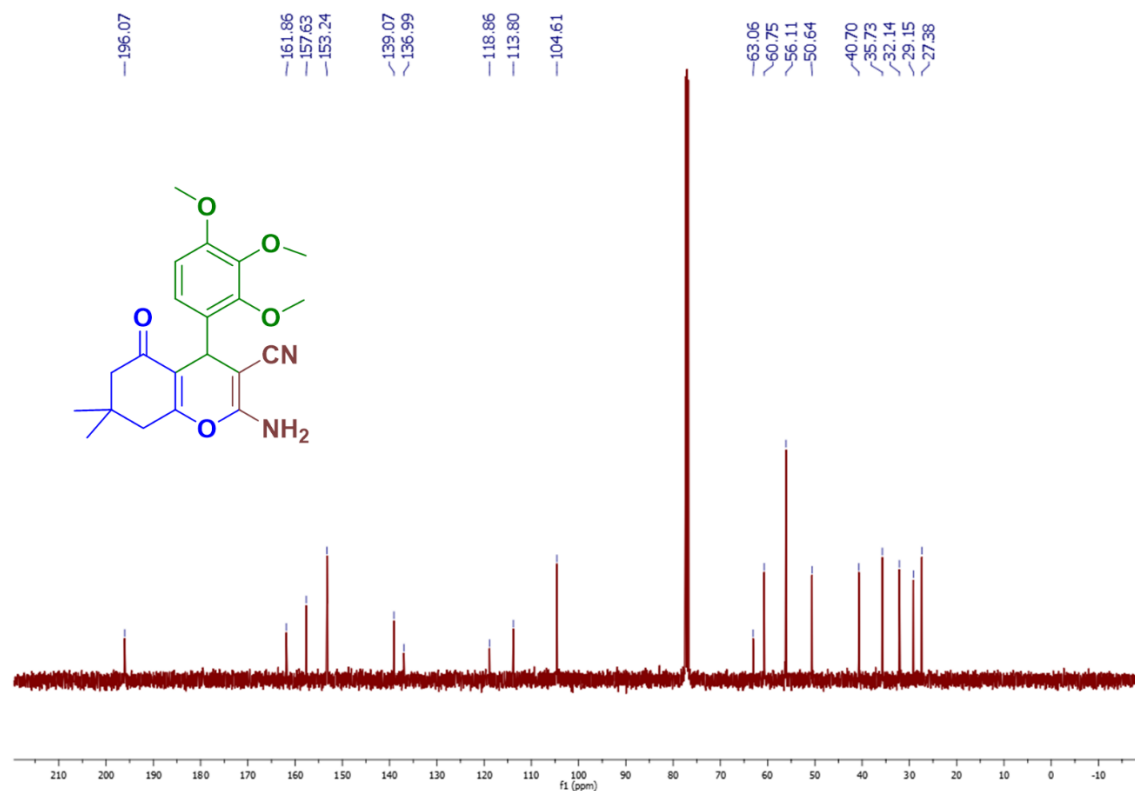

Figure S27.  $^{13}\text{C}\{^1\text{H}\}$  NMR spectrum of **4f** in  $\text{DMSO-}d_6$  (100 MHz, 293 K).

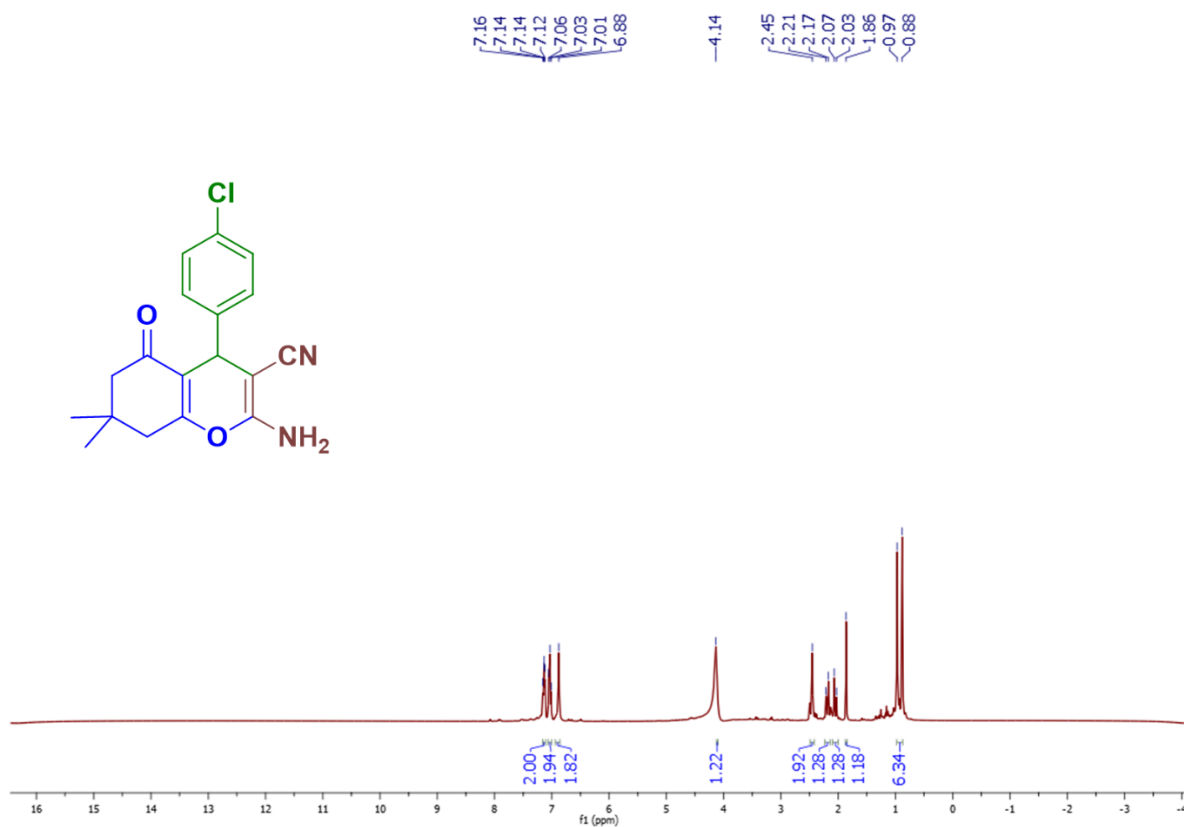

Figure S28.  $^1\text{H}$  NMR spectrum **4g** in  $\text{DMSO-}d_6$  (400 MHz, 293 K).

# Supporting Information

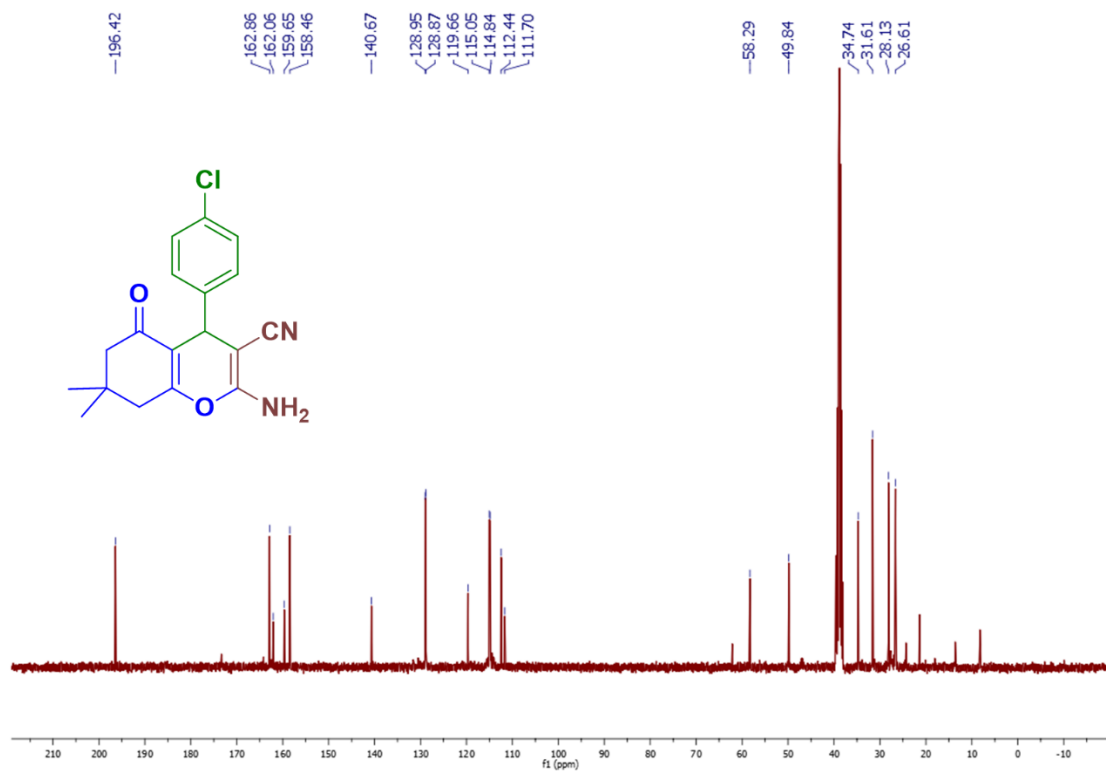

Figure S29.  $^{13}\text{C}\{^1\text{H}\}$  NMR spectrum of **4g** in  $\text{DMSO-}d_6$  (100 MHz, 293 K).

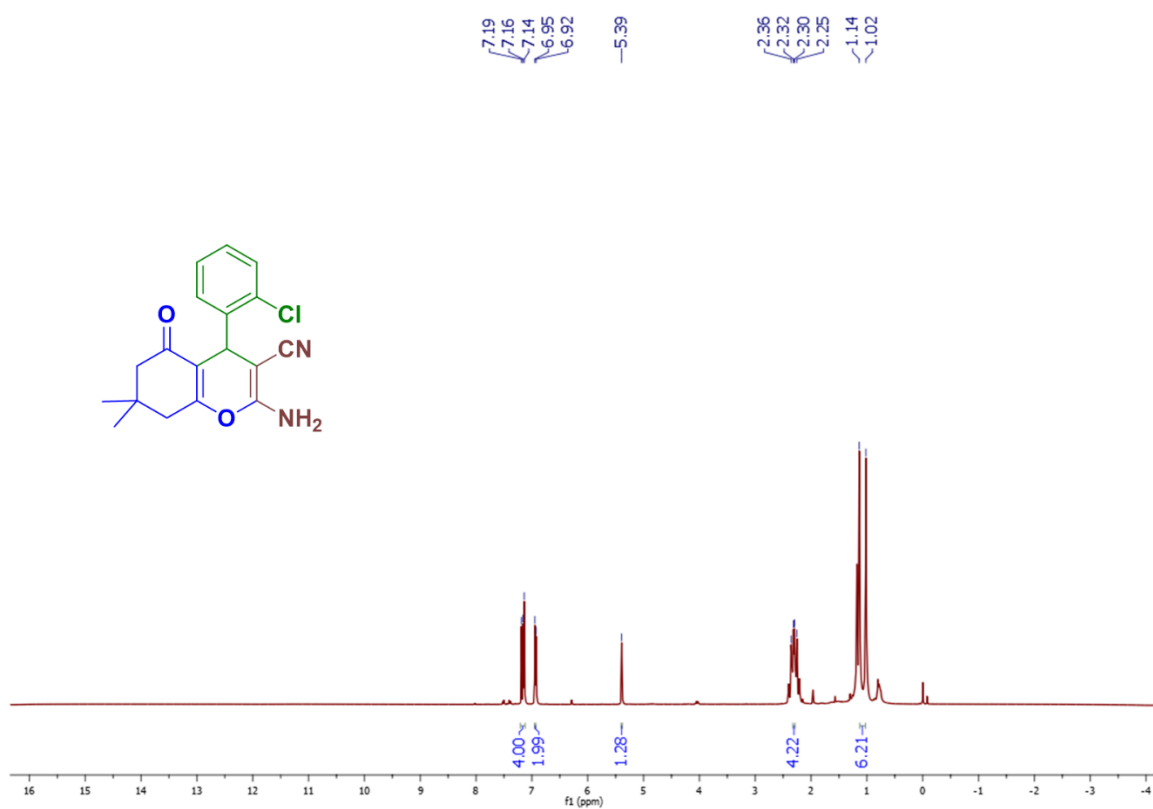

Figure S30.  $^1\text{H}$  NMR spectrum of **4h** in  $\text{DMSO-}d_6$  (400 MHz, 293 K).

# Supporting Information

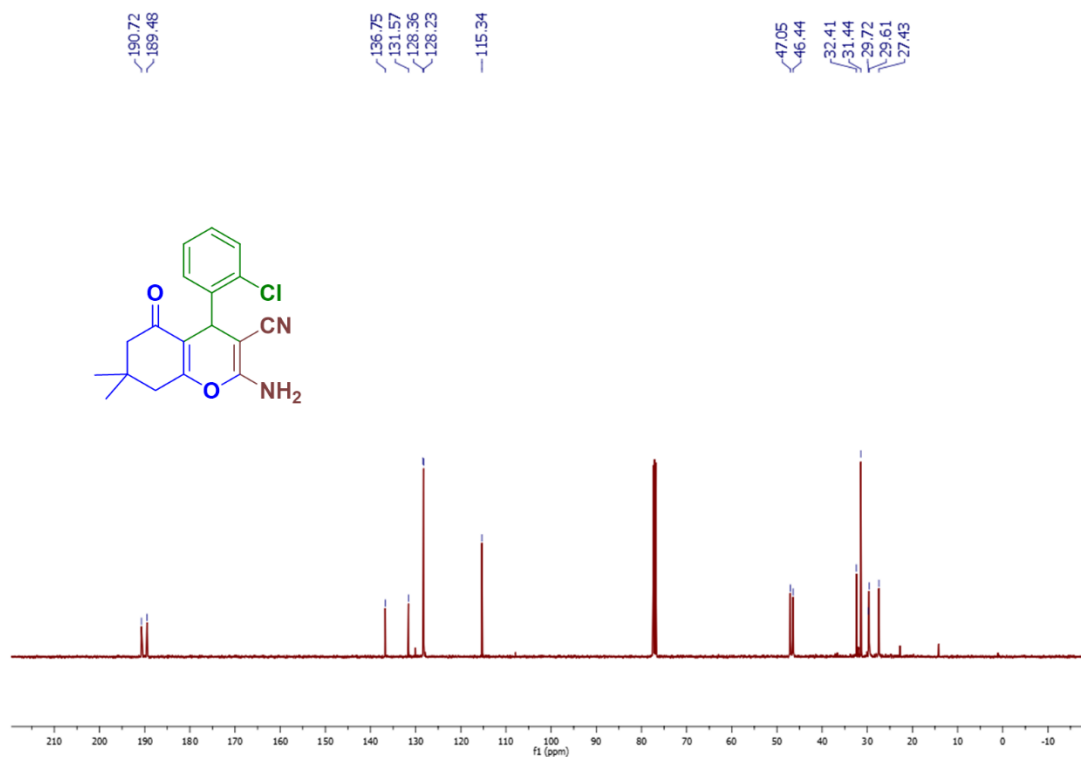

Figure S31. <sup>13</sup>C{<sup>1</sup>H} NMR spectrum of **4h** in DMSO-*d*<sub>6</sub> (100 MHz, 293 K).

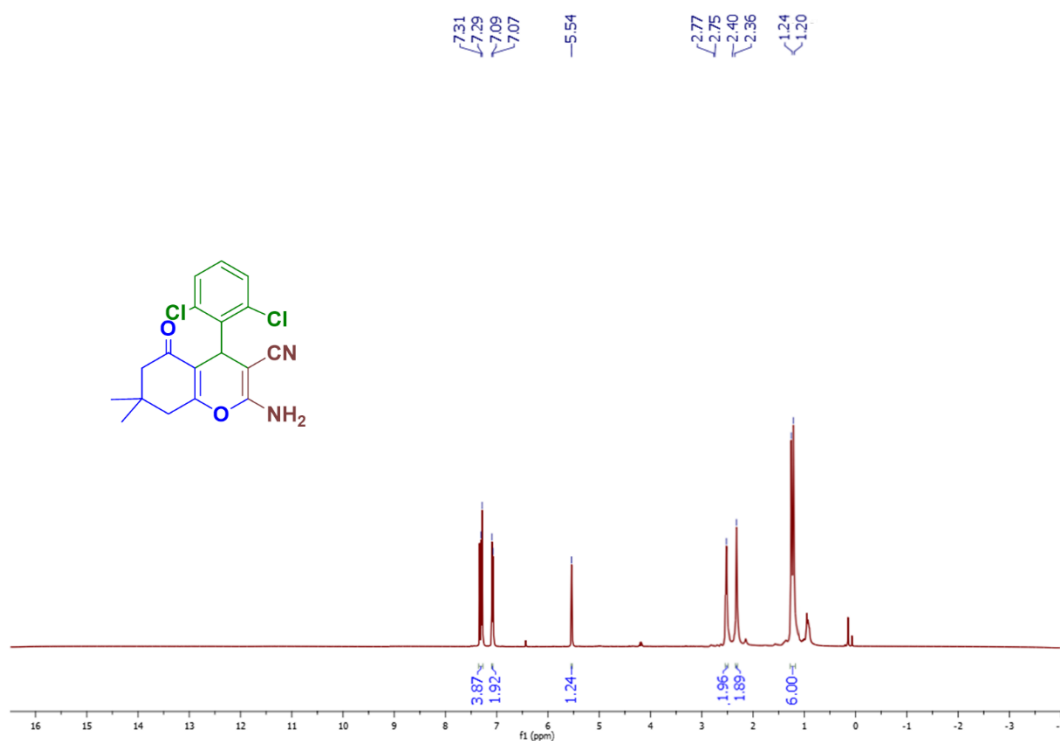

Figure S32. <sup>1</sup>H NMR spectrum **4i** in DMSO-*d*<sub>6</sub> (400 MHz, 293 K).

# Supporting Information

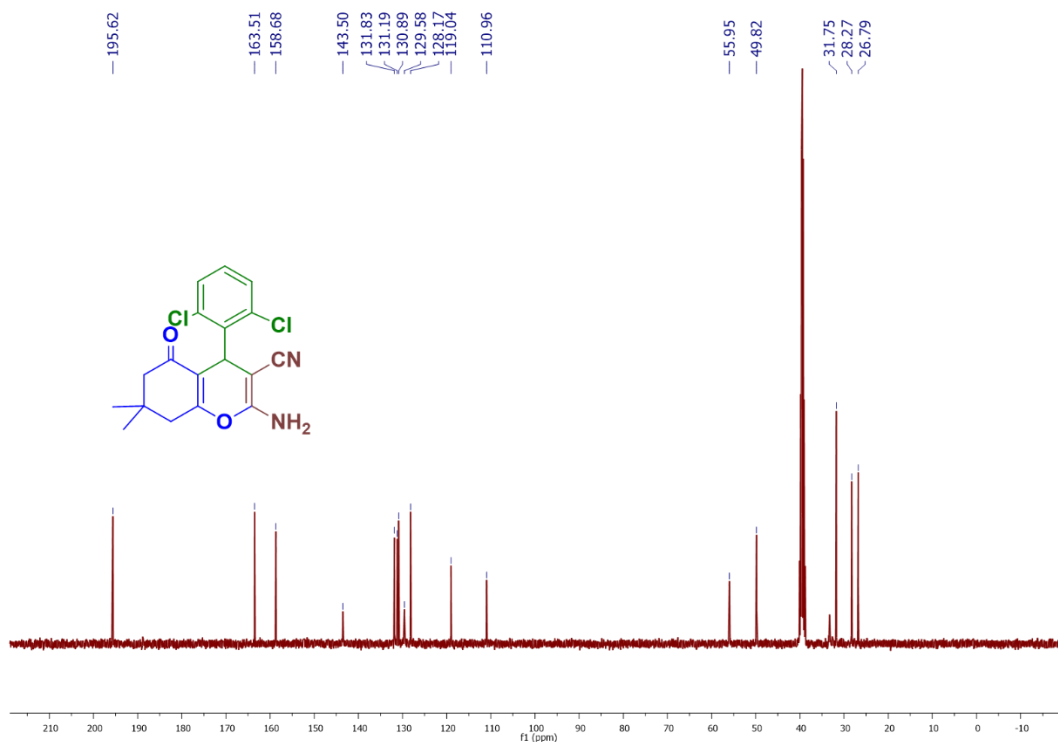

Figure S33.  $^{13}\text{C}\{^1\text{H}\}$  NMR spectrum of **4i** in  $\text{DMSO-}d_6$  (100 MHz, 293 K).

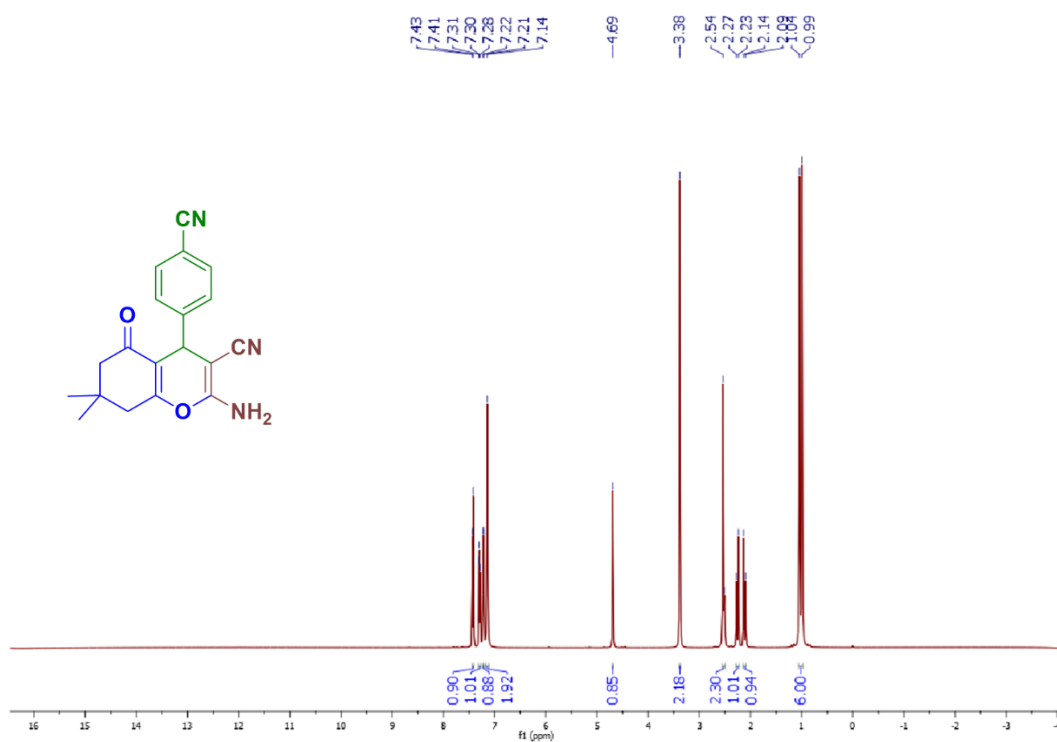

Figure S34.  $^1\text{H}$  NMR spectrum of **4j** in  $\text{DMSO-}d_6$  (400 MHz, 293 K).

# Supporting Information

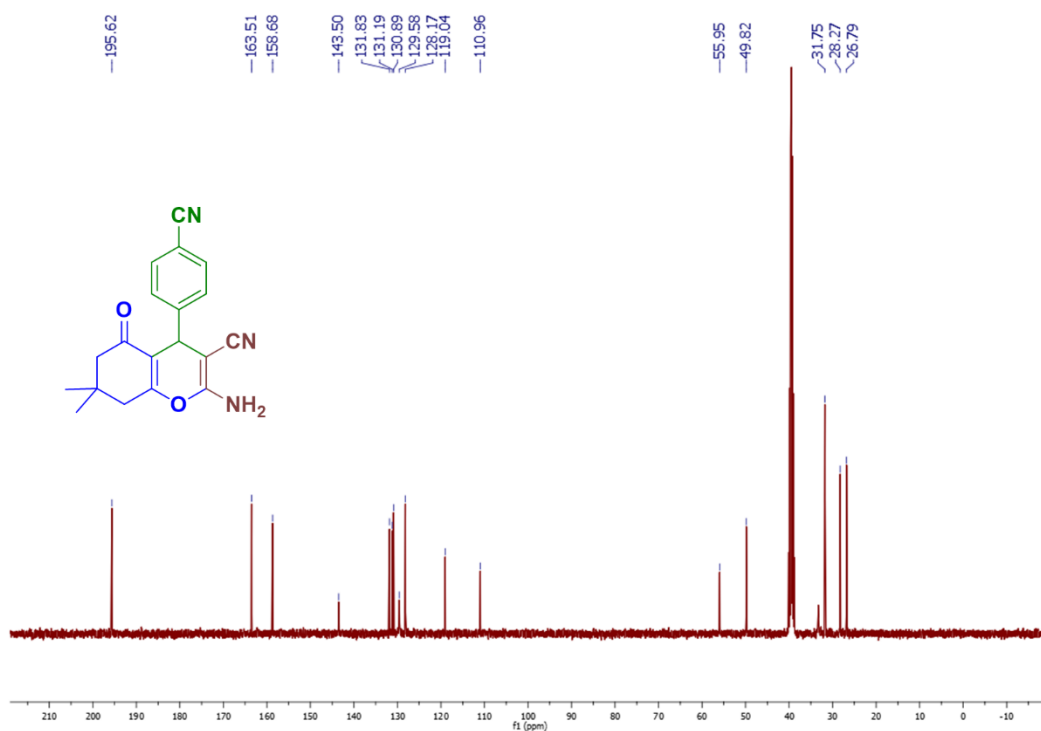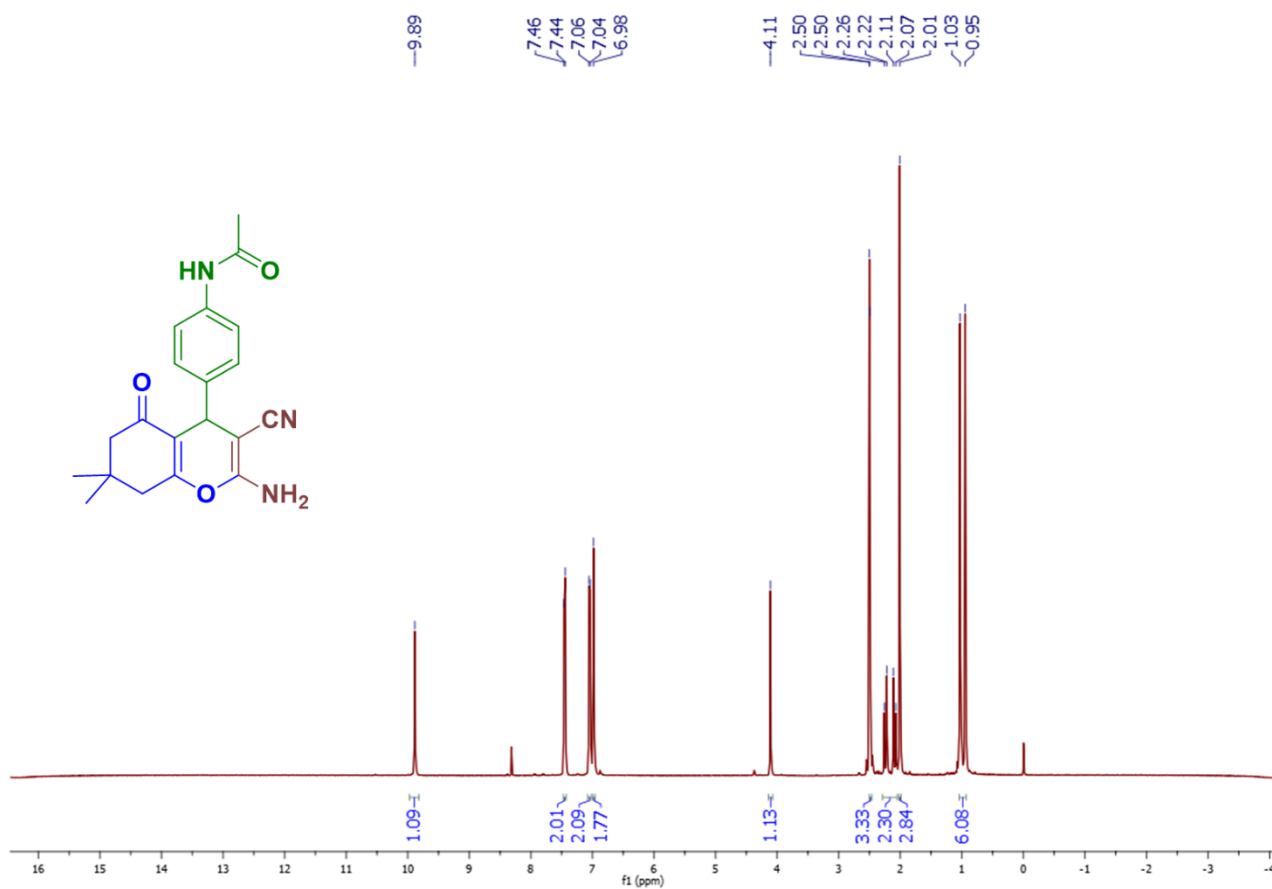

# Supporting Information

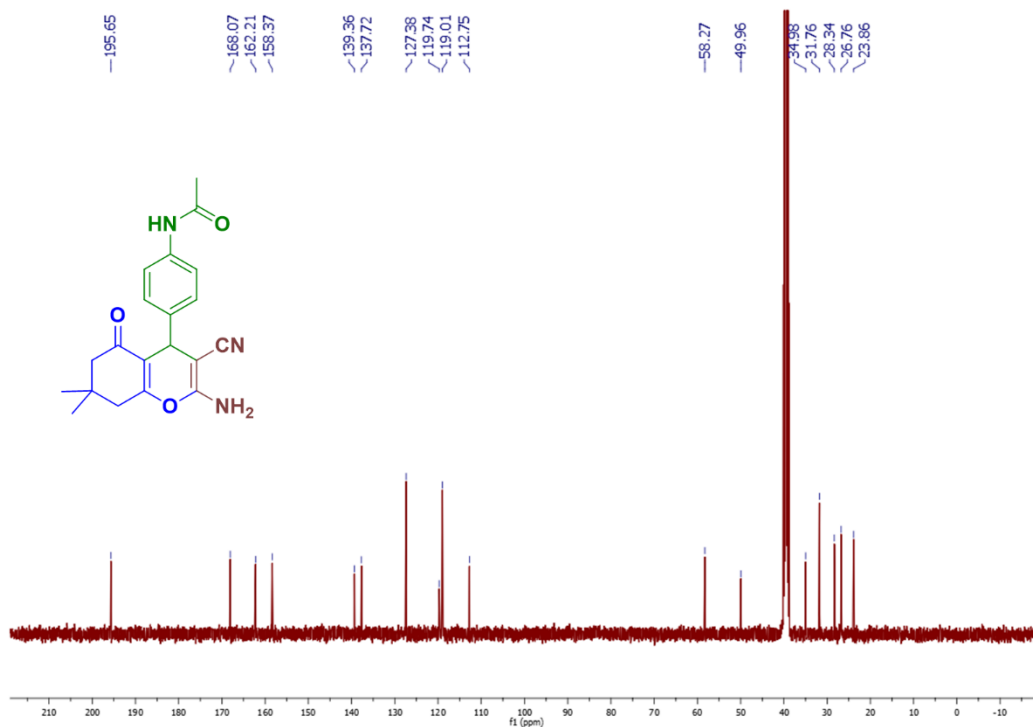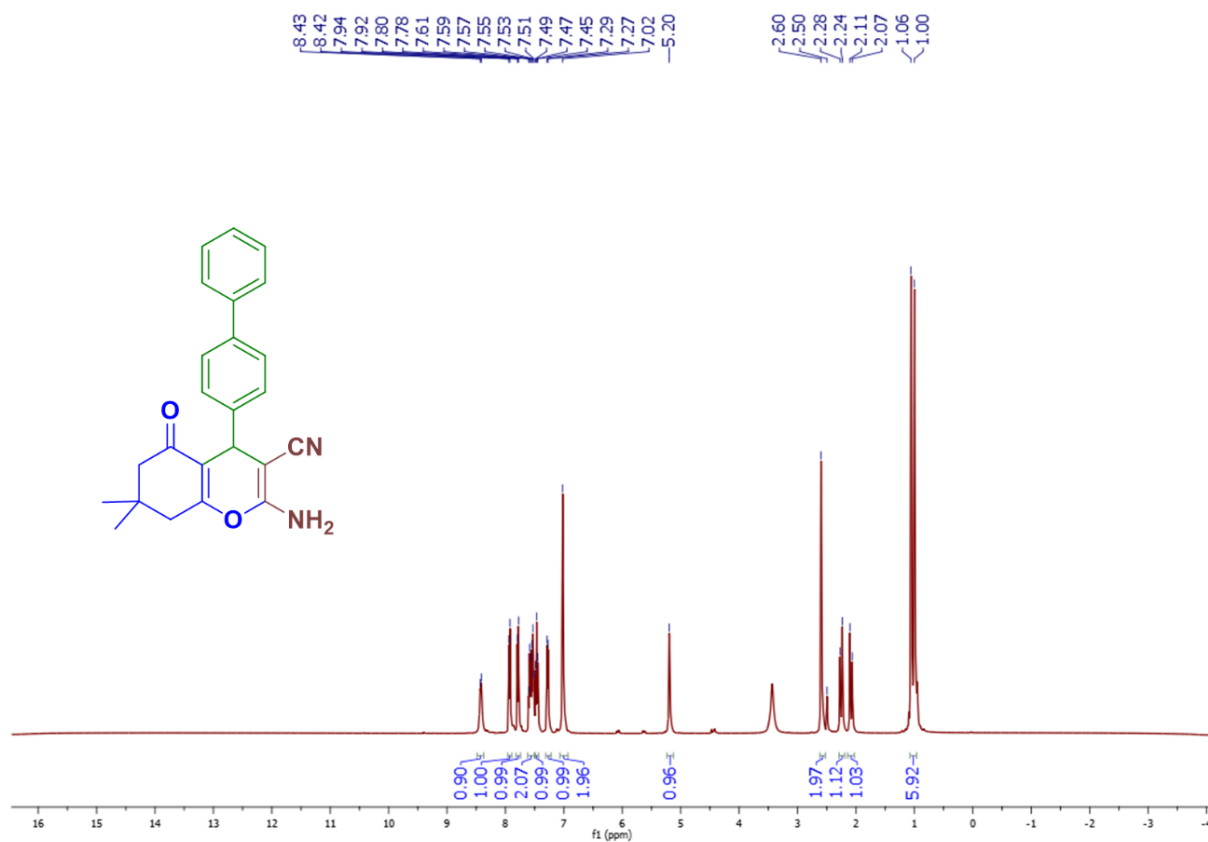

# Supporting Information

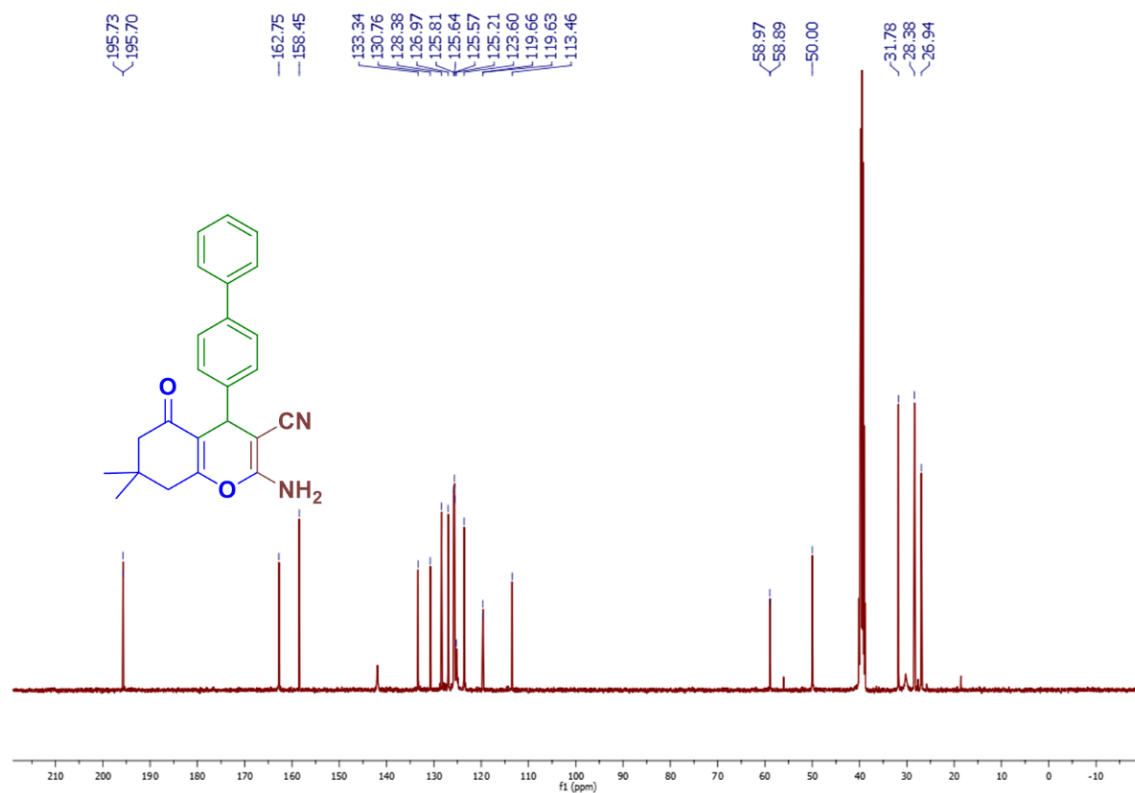

**Figure S39.**  $^{13}\text{C}\{^1\text{H}\}$  NMR spectrum of **4l** in  $\text{DMSO-}d_6$  (100 MHz, 293 K).

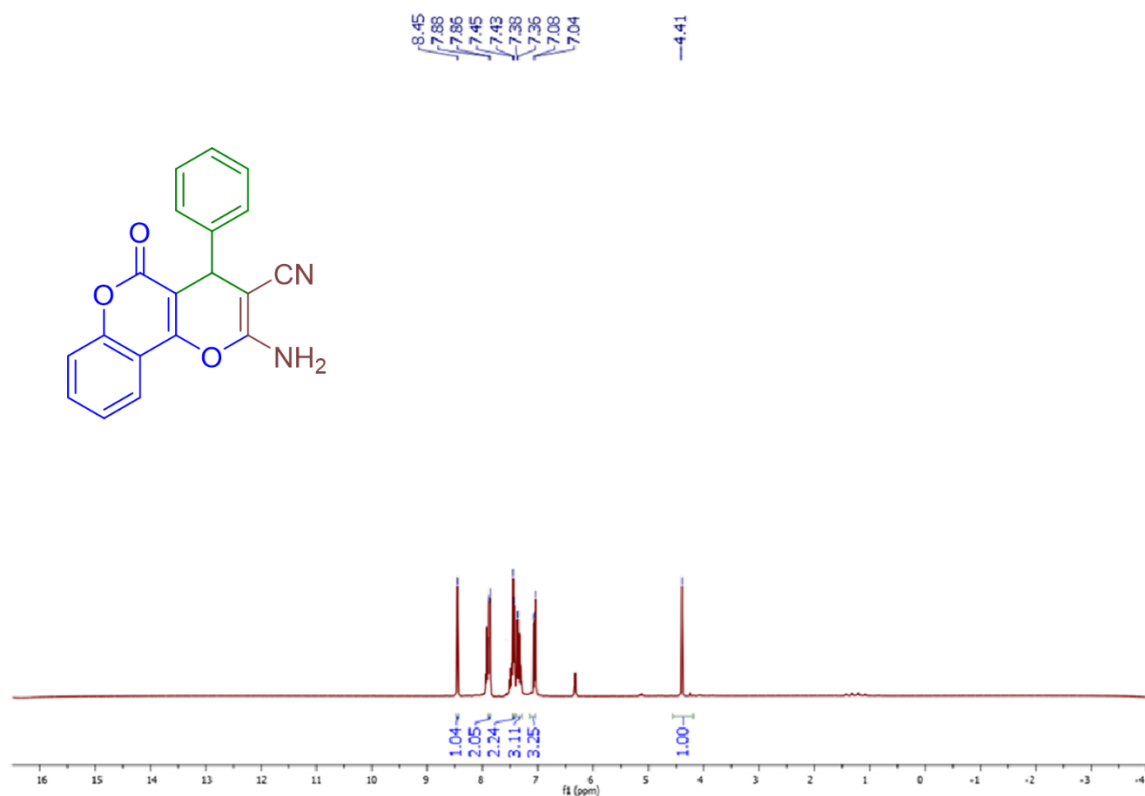

**Figure S40.**  $^1\text{H}$  NMR spectrum of **5a** in  $\text{DMSO-}d_6$  (400 MHz, 293 K).

# Supporting Information

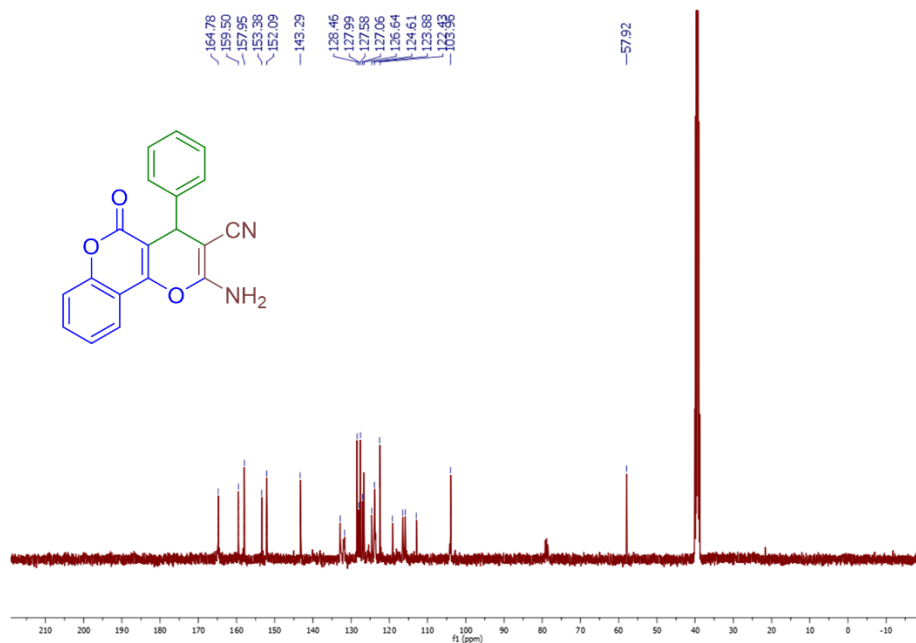

**Figure S41.**  $^{13}\text{C}\{^1\text{H}\}$  NMR spectrum of **5a** in  $\text{DMSO-}d_6$  (100 MHz, 293 K).

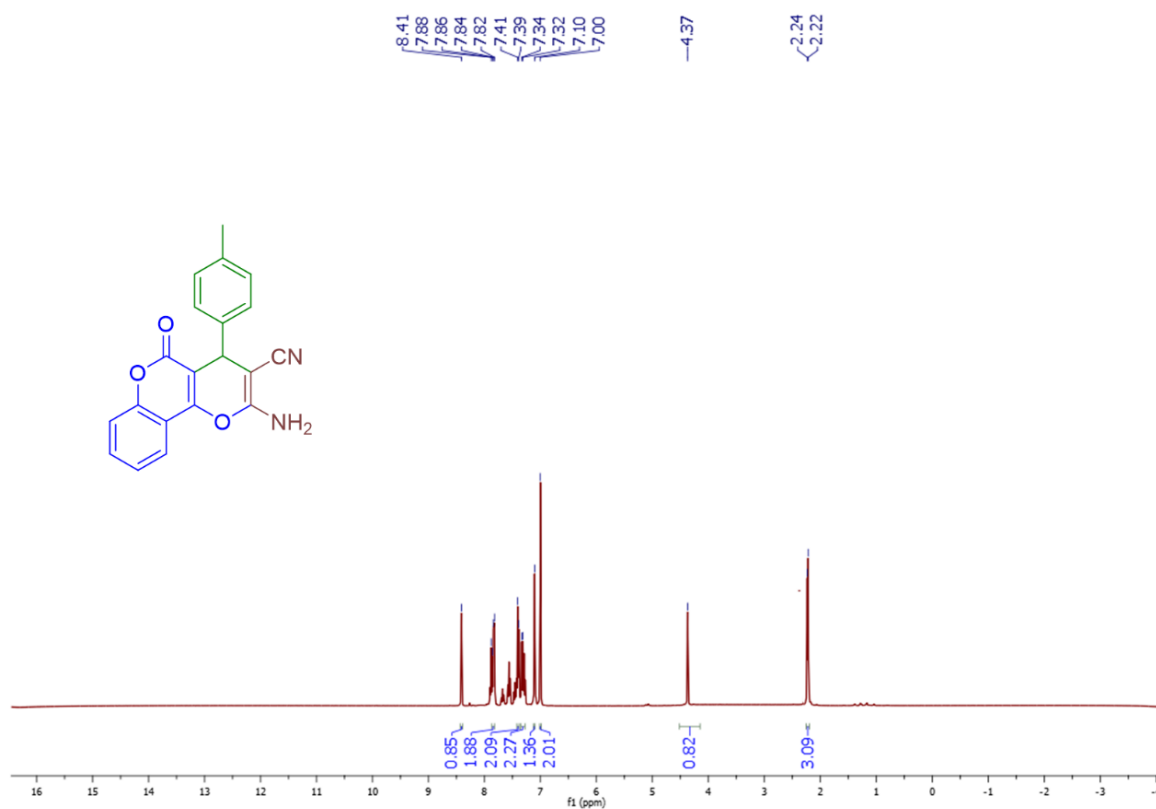

**Figure S42.**  $^1\text{H}$  NMR spectrum of **5b** in  $\text{DMSO-}d_6$  (400 MHz, 293 K).

# Supporting Information

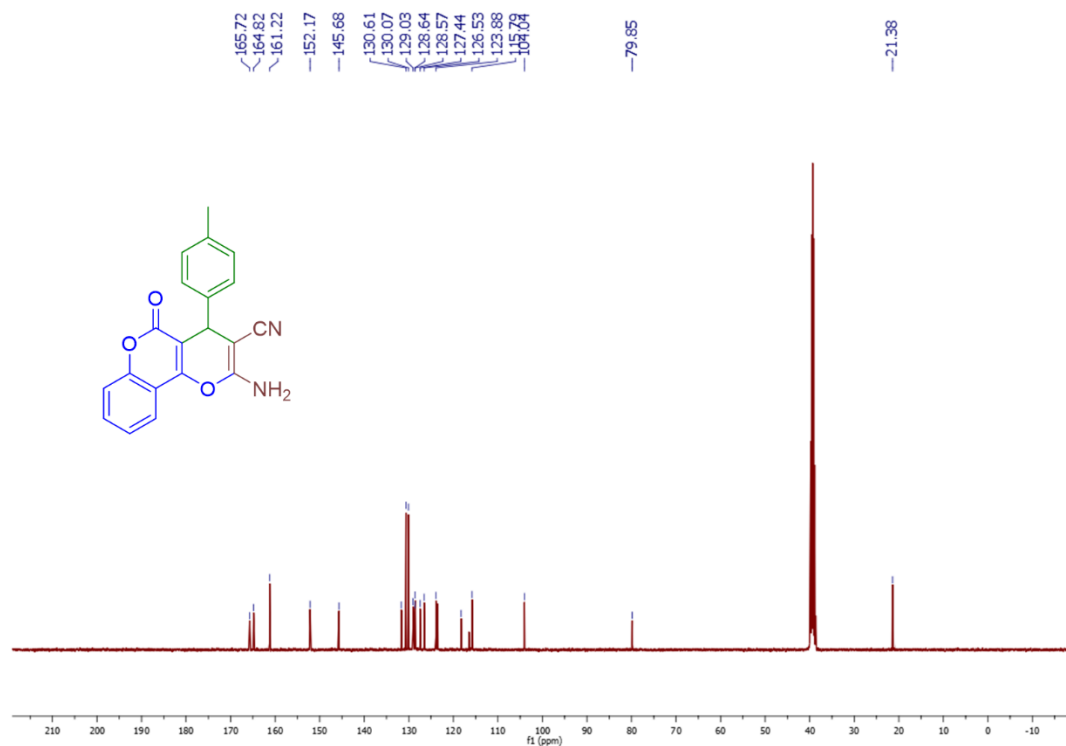

Figure S43.  $^{13}\text{C}\{^1\text{H}\}$  NMR spectrum of **5b** in  $\text{DMSO-}d_6$  (100 MHz, 293 K).

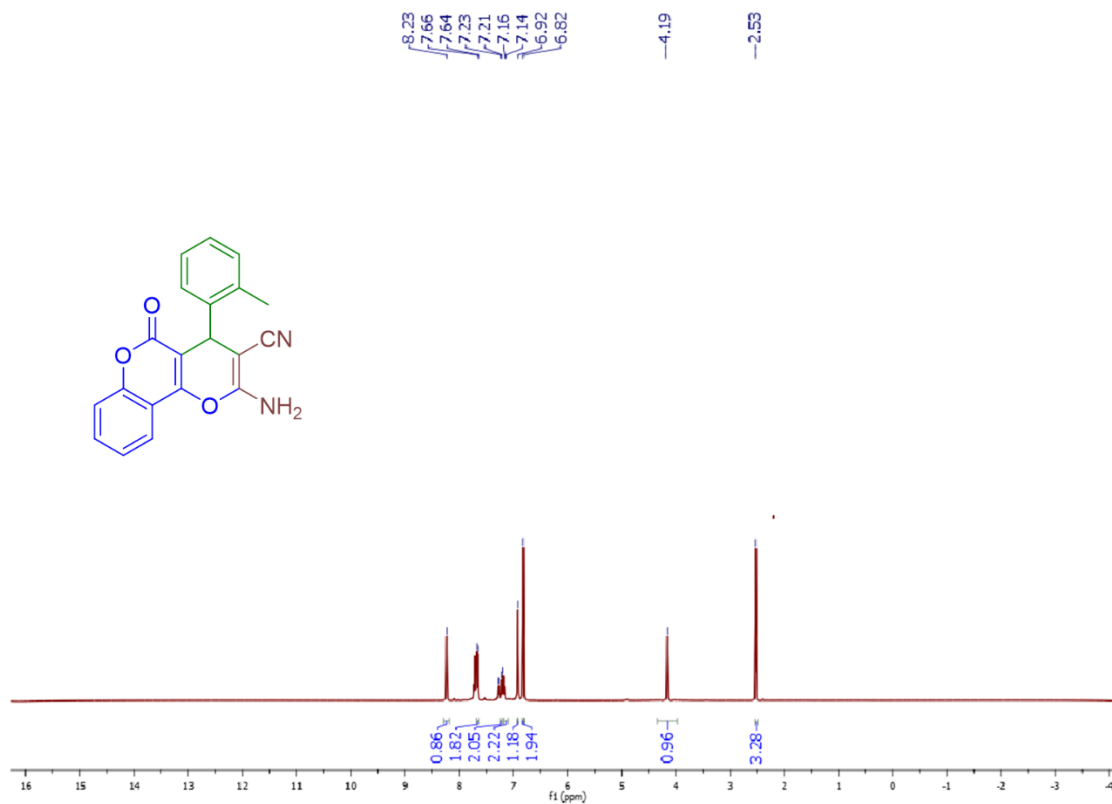

Figure S44.  $^1\text{H}$  NMR spectrum **5c** in  $\text{DMSO-}d_6$  (400 MHz, 293 K).

# Supporting Information

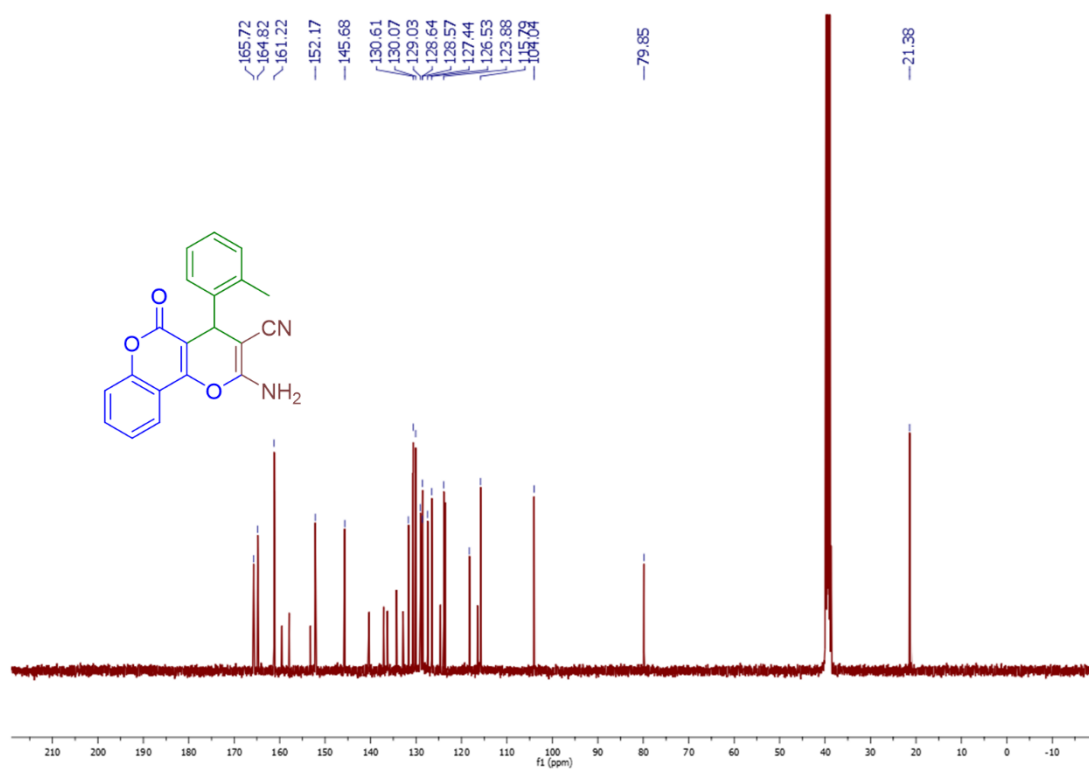

**Figure S45.** <sup>13</sup>C{<sup>1</sup>H} NMR spectrum of **5c** in DMSO-*d*<sub>6</sub> (100 MHz, 293 K).

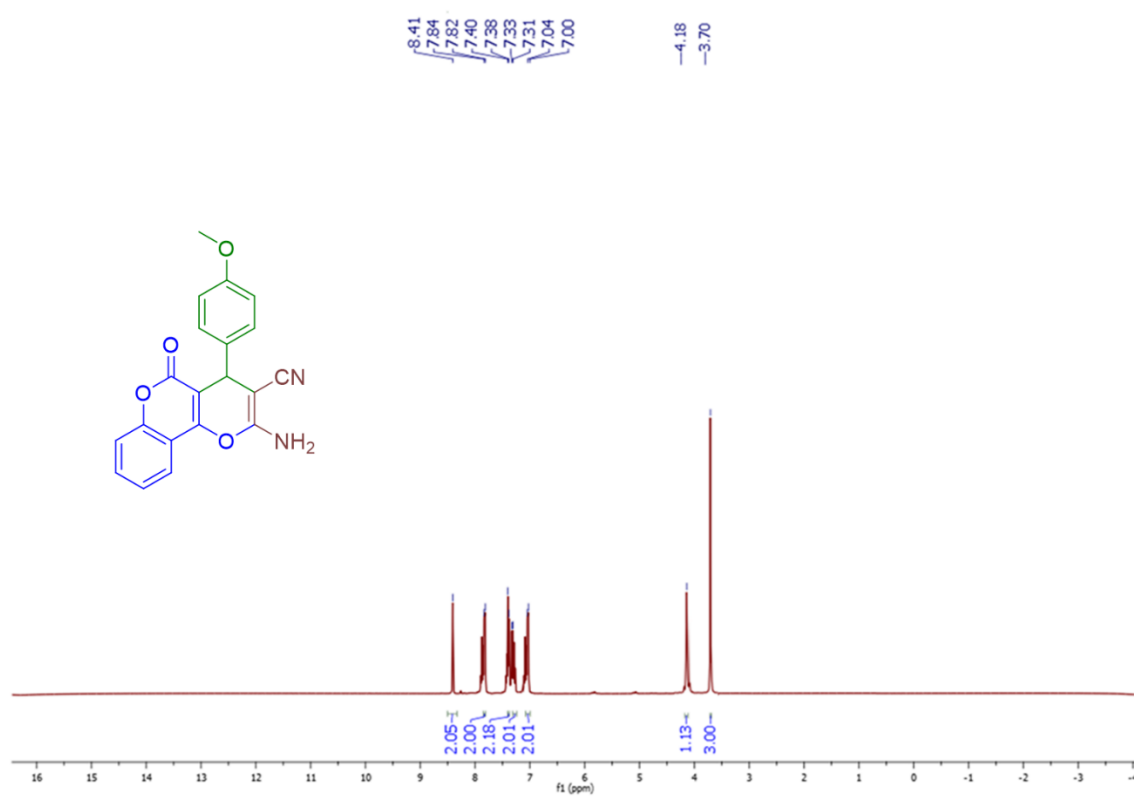

**Figure S46.** <sup>1</sup>H NMR spectrum of **5d** in DMSO-*d*<sub>6</sub> (400 MHz, 293 K).

# Supporting Information

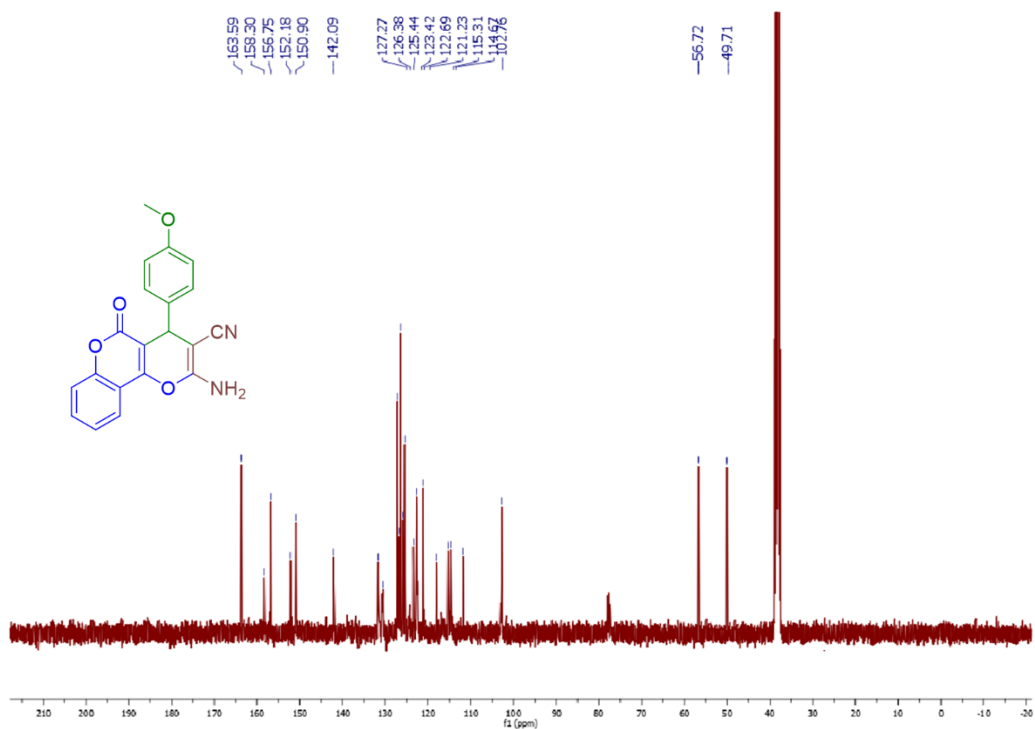

**Figure S47.** <sup>13</sup>C{<sup>1</sup>H} NMR spectrum of **5d** in DMSO-*d*<sub>6</sub> (100 MHz, 293 K).

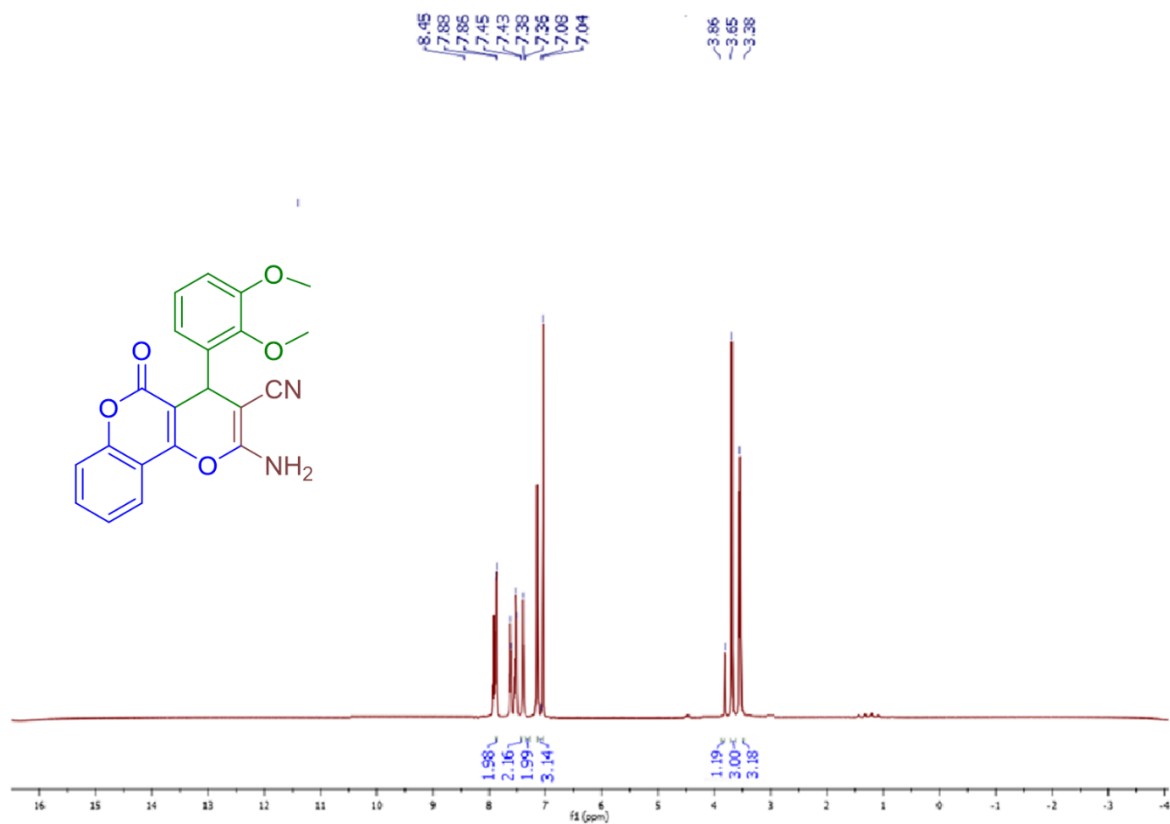

**Figure S48.** <sup>1</sup>H NMR spectrum **5e** in DMSO-*d*<sub>6</sub> (400 MHz, 293 K).

# Supporting Information

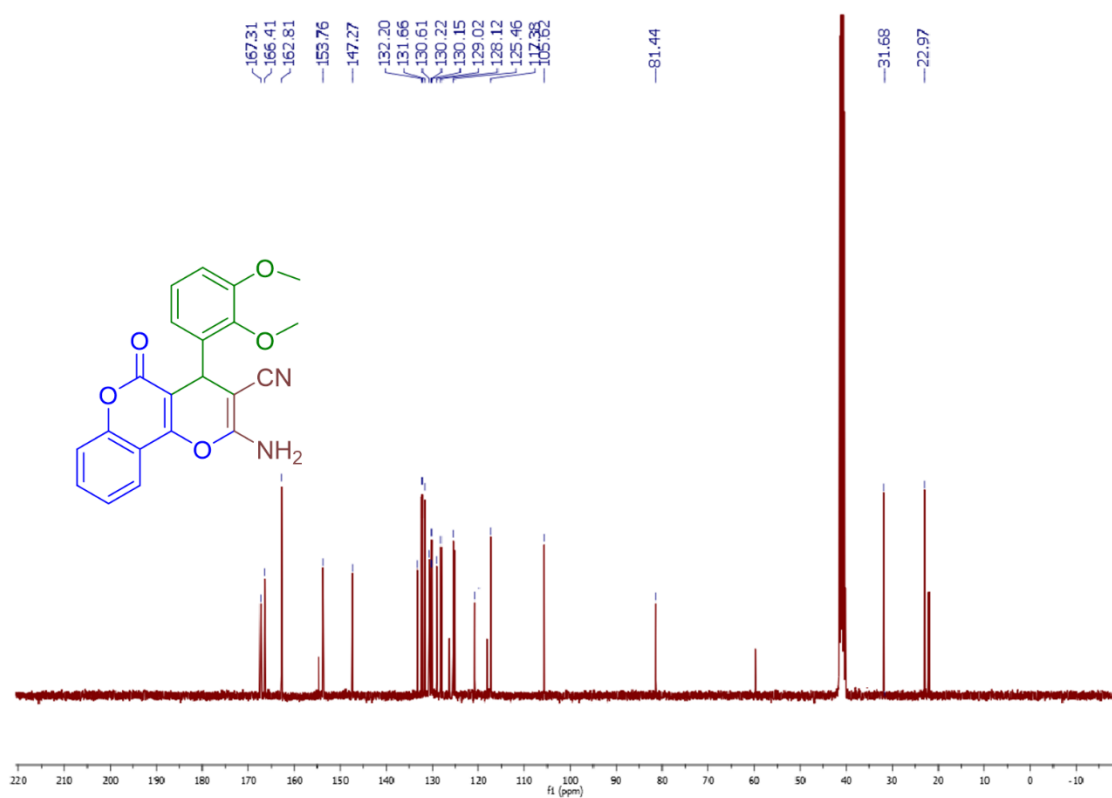

**Figure S49.**  $^{13}\text{C}\{^1\text{H}\}$  NMR spectrum of **5e** in  $\text{DMSO-}d_6$  (100 MHz, 293 K).

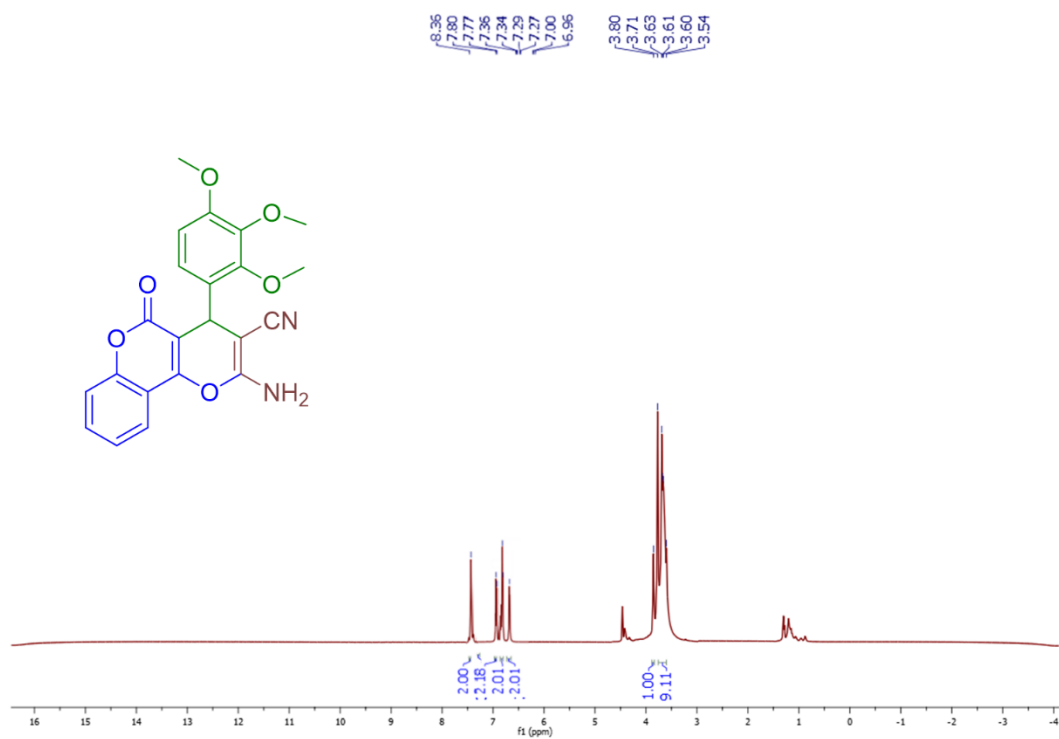

**Figure S50.**  $^1\text{H}$  NMR spectrum of **5f** in  $\text{DMSO-}d_6$  (400 MHz, 293 K).

# Supporting Information

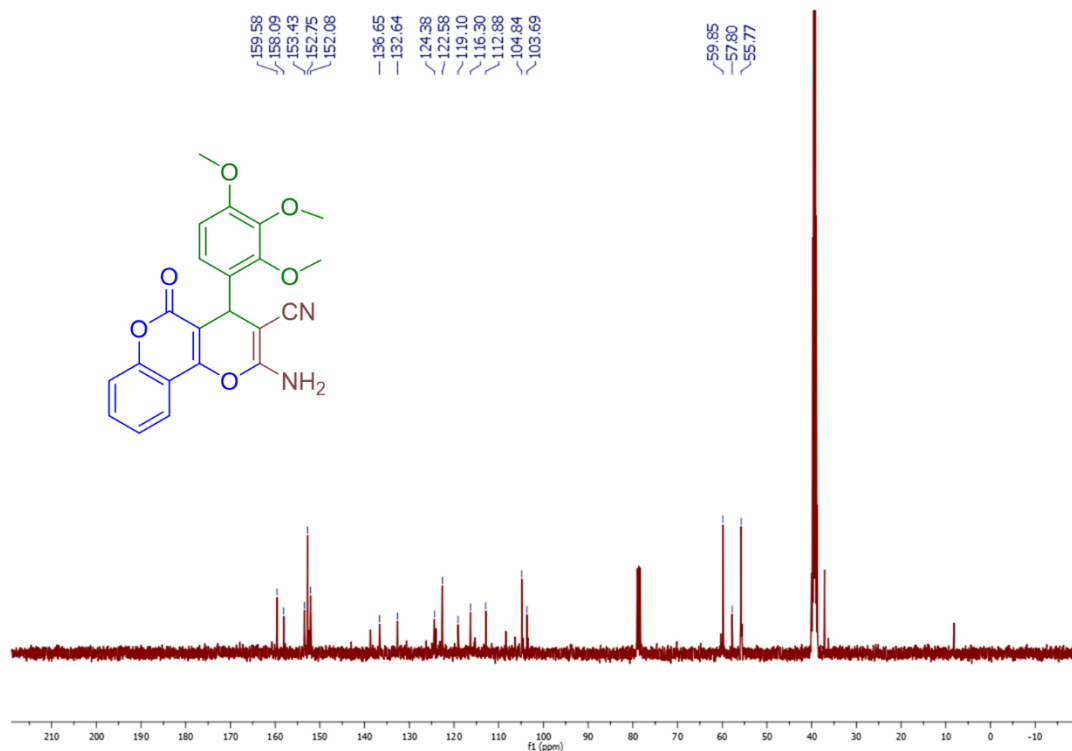

Figure S51.  $^{13}\text{C}\{^1\text{H}\}$  NMR spectrum of **5f** in  $\text{DMSO-}d_6$  (100 MHz, 293 K).

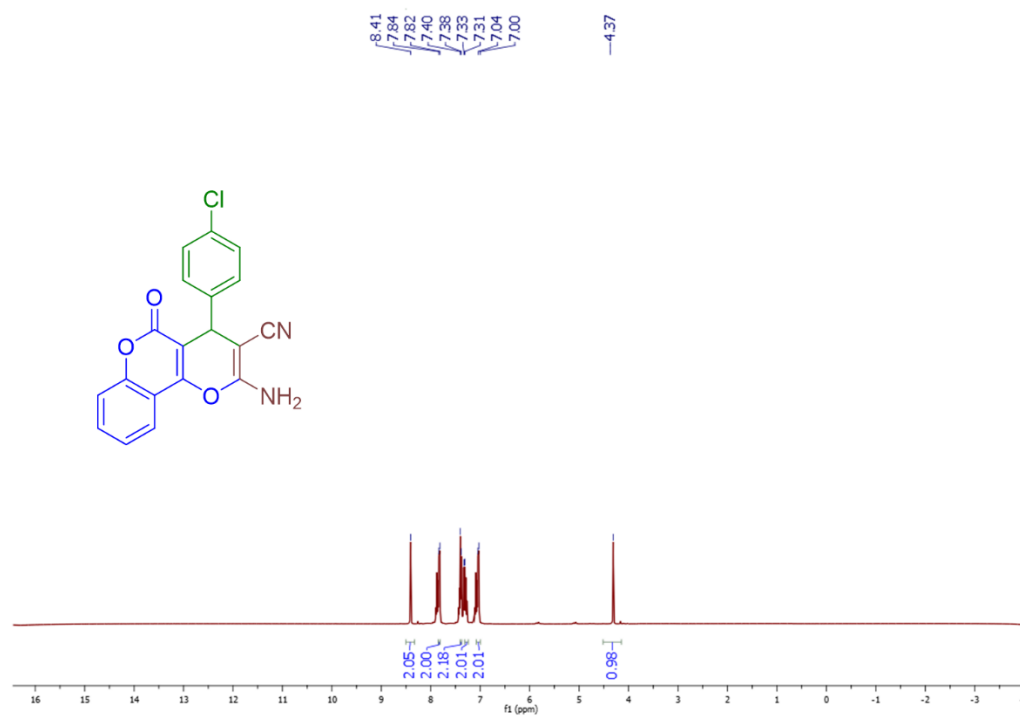

Figure S52.  $^1\text{H}$  NMR spectrum **5g** in  $\text{DMSO-}d_6$  (400 MHz, 293 K).

# Supporting Information

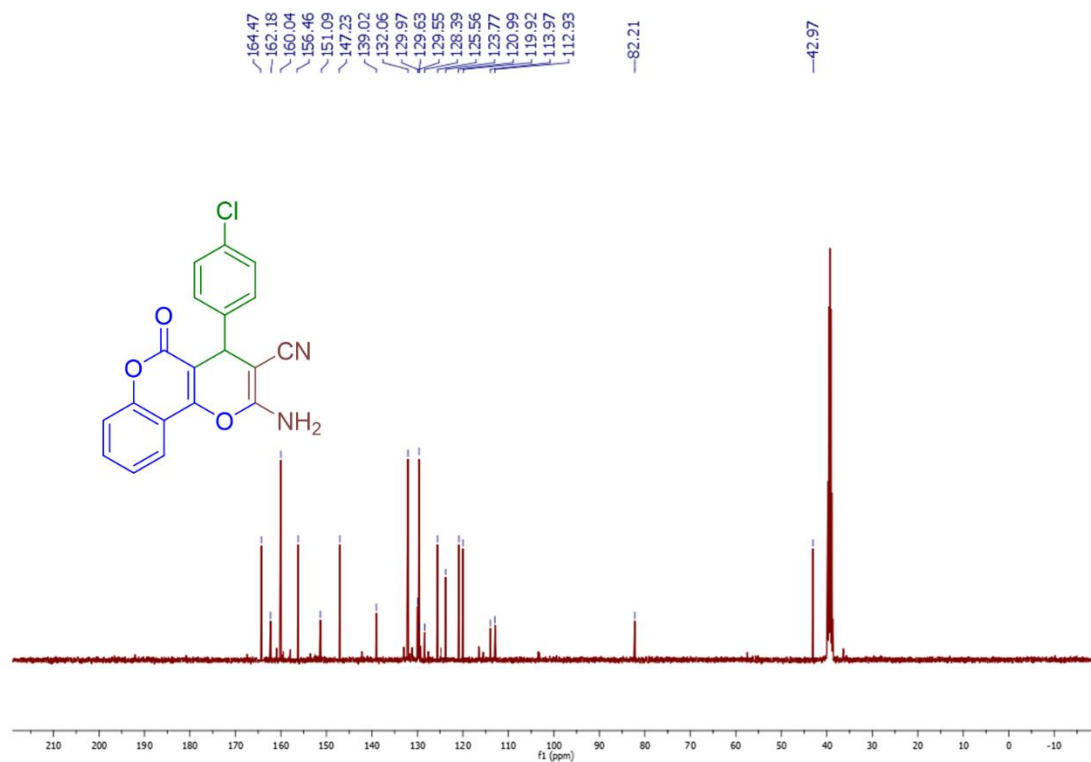

**Figure S53.** <sup>13</sup>C {<sup>1</sup>H} NMR spectrum of **5g** in DMSO-*d*<sub>6</sub> (100 MHz, 293 K).

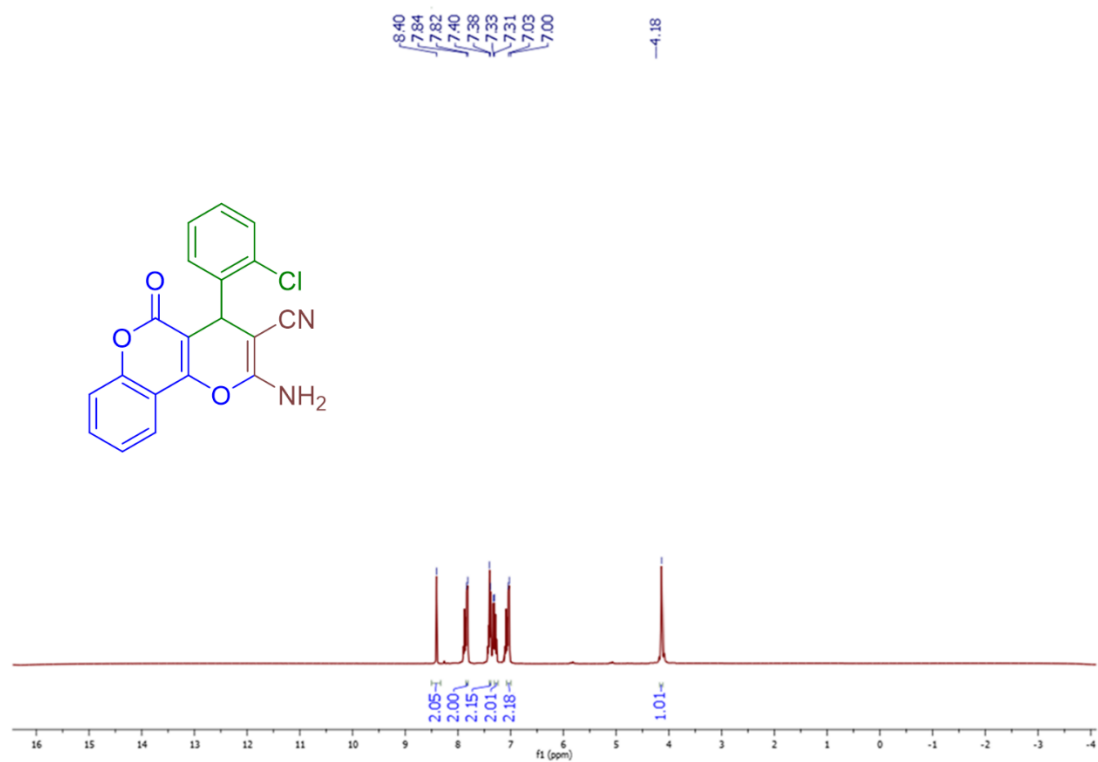

**Figure S54.** <sup>1</sup>H NMR spectrum of **5h** in DMSO-*d*<sub>6</sub> (400 MHz, 293 K).

# Supporting Information

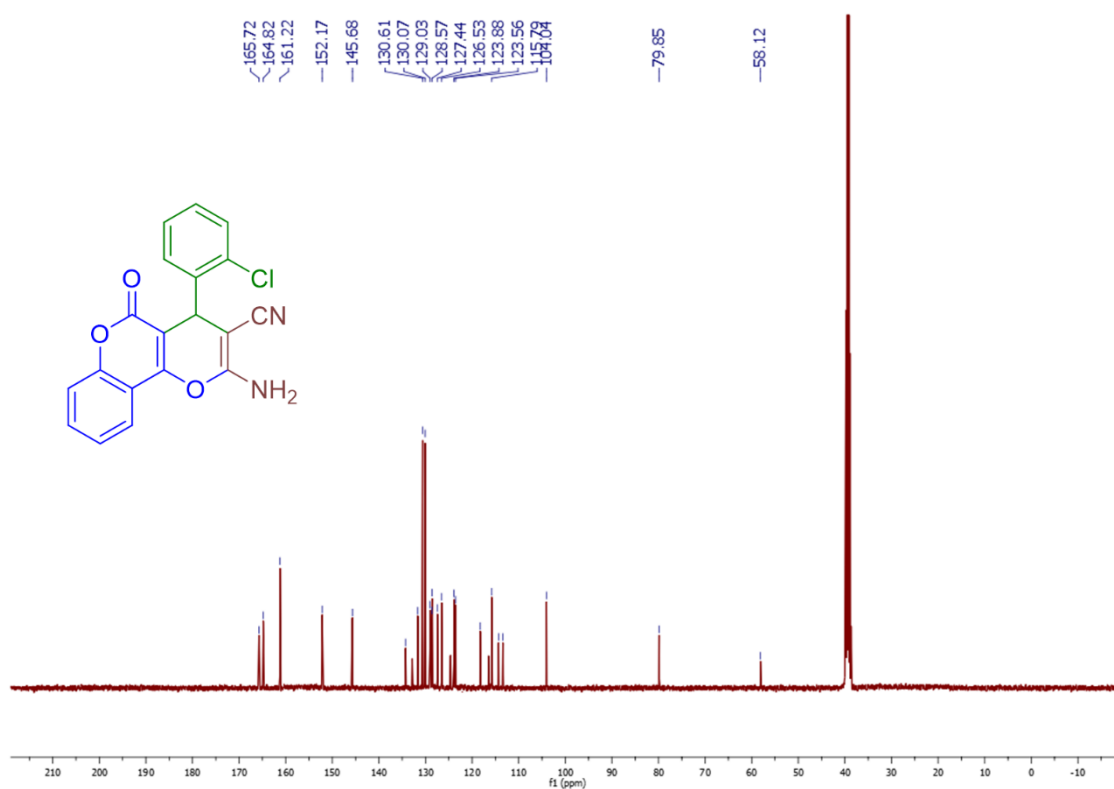

Figure S55. <sup>13</sup>C{<sup>1</sup>H} NMR spectrum of **5h** in DMSO-*d*<sub>6</sub> (100 MHz, 293 K).

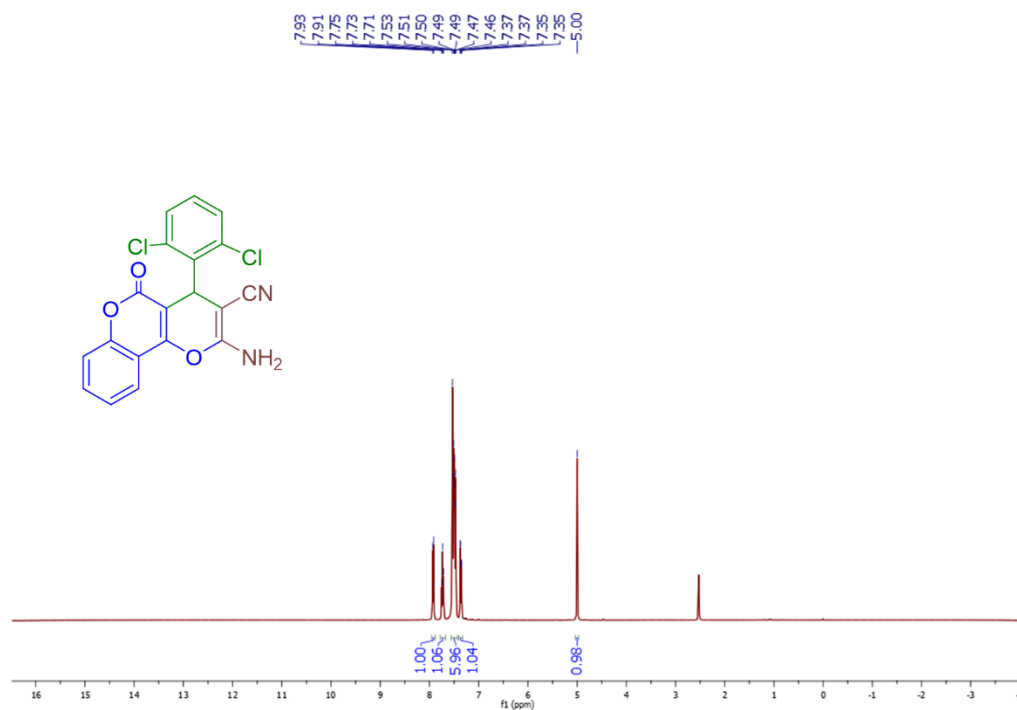

Figure S56. <sup>1</sup>H NMR spectrum **5i** in DMSO-*d*<sub>6</sub> (400 MHz, 293 K).

# Supporting Information

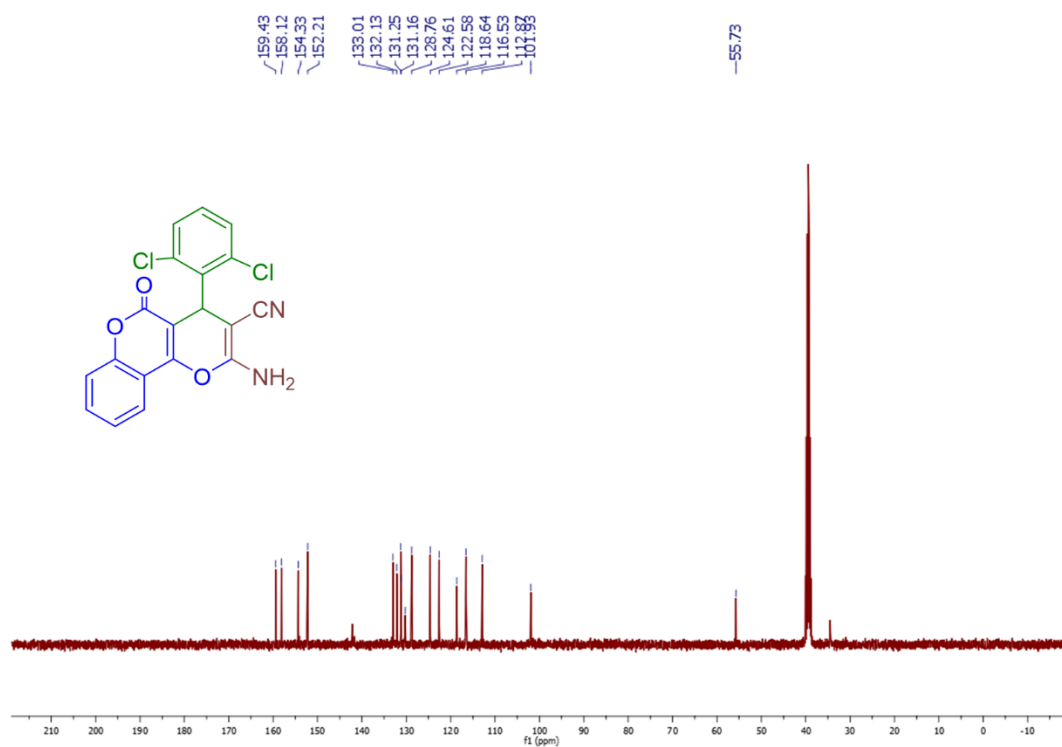

Figure S57. <sup>13</sup>C {<sup>1</sup>H} NMR spectrum of **5i** in DMSO-*d*<sub>6</sub> (100 MHz, 293 K).

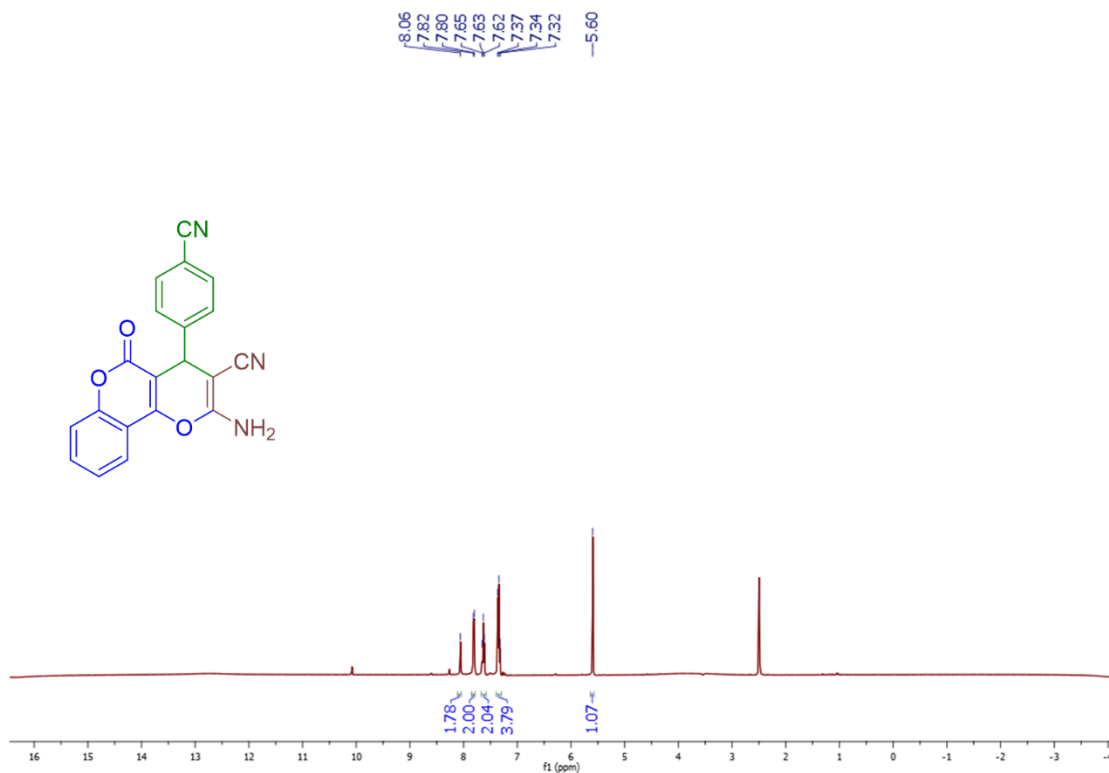

Figure S58. <sup>1</sup>H NMR spectrum of **5j** in DMSO-*d*<sub>6</sub> (400 MHz, 293 K).

# Supporting Information

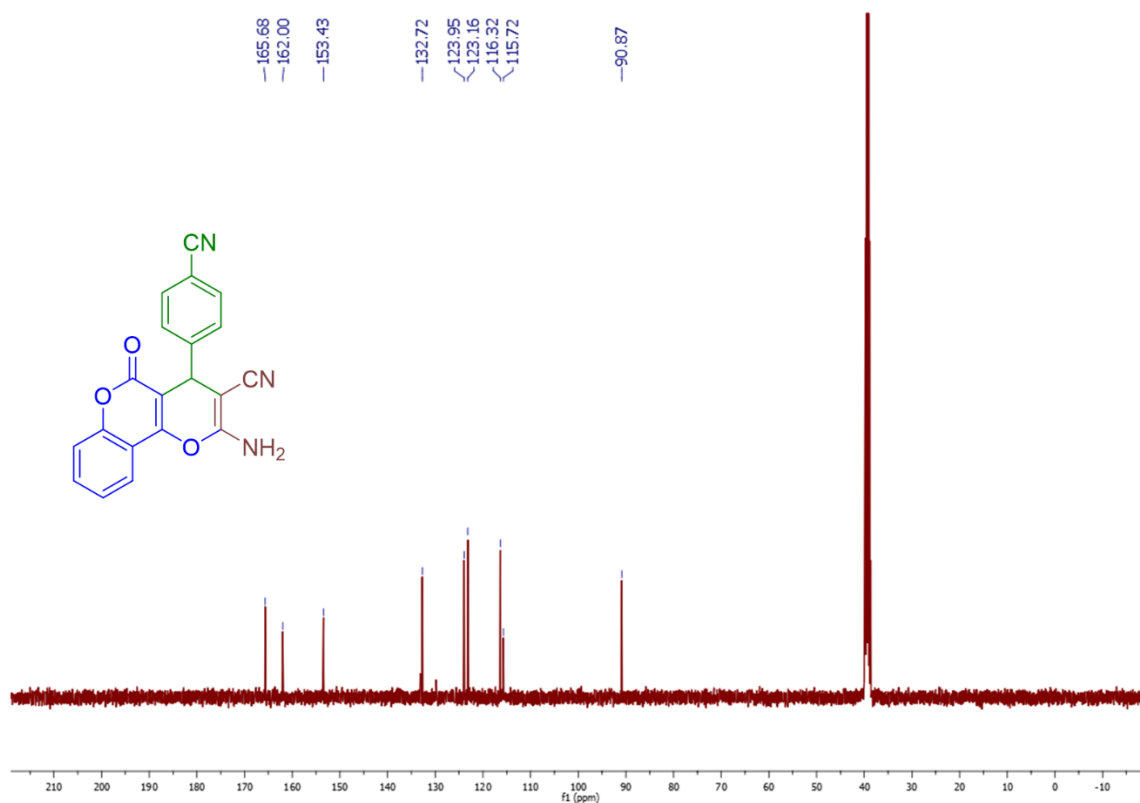

**Figure S59.**  $^{13}\text{C}\{^1\text{H}\}$  NMR spectrum of **5j** in  $\text{DMSO-}d_6$  (100 MHz, 293 K).

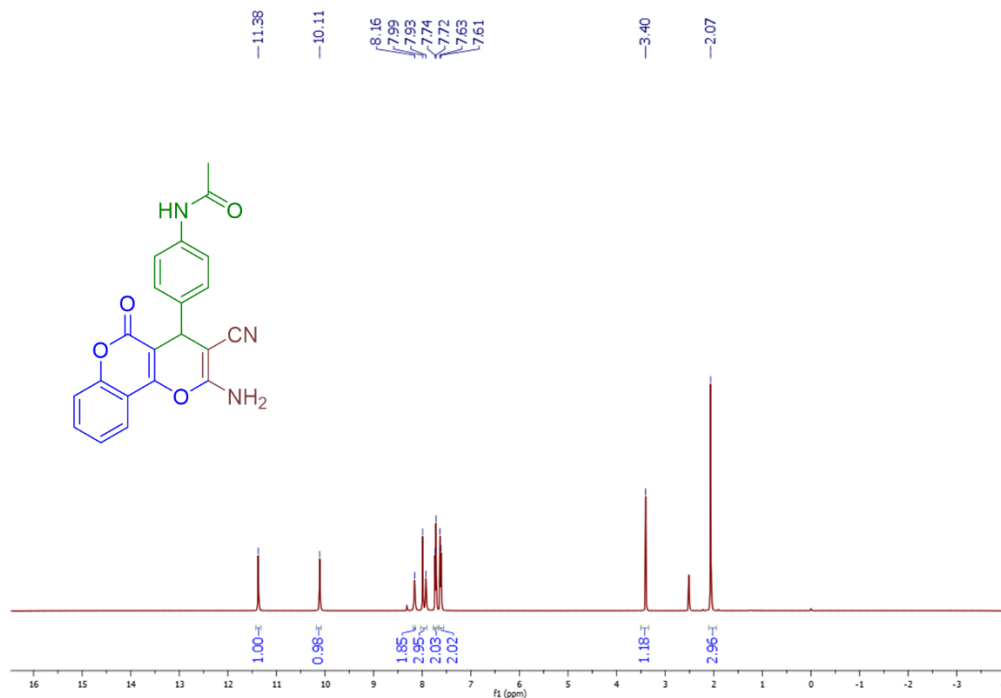

**Figure S60.**  $^1\text{H}$  NMR spectrum **5k** in  $\text{DMSO-}d_6$  (400 MHz, 293 K).

# Supporting Information

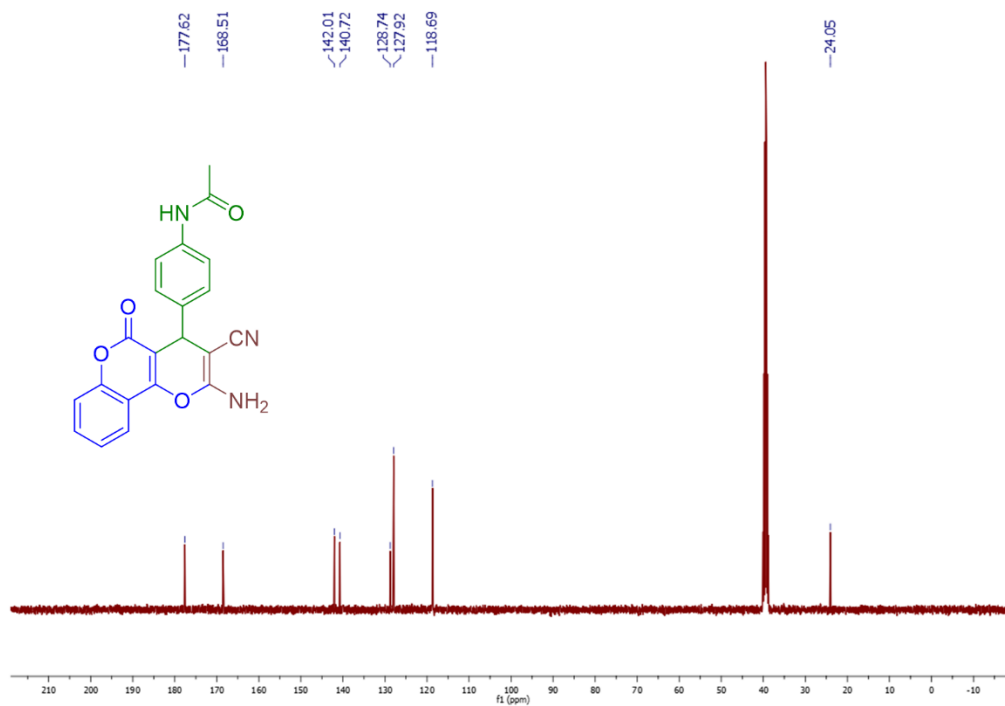

Figure S61.  $^{13}\text{C}\{^1\text{H}\}$  NMR spectrum of **5k** in  $\text{DMSO-}d_6$  (100 MHz, 293 K).

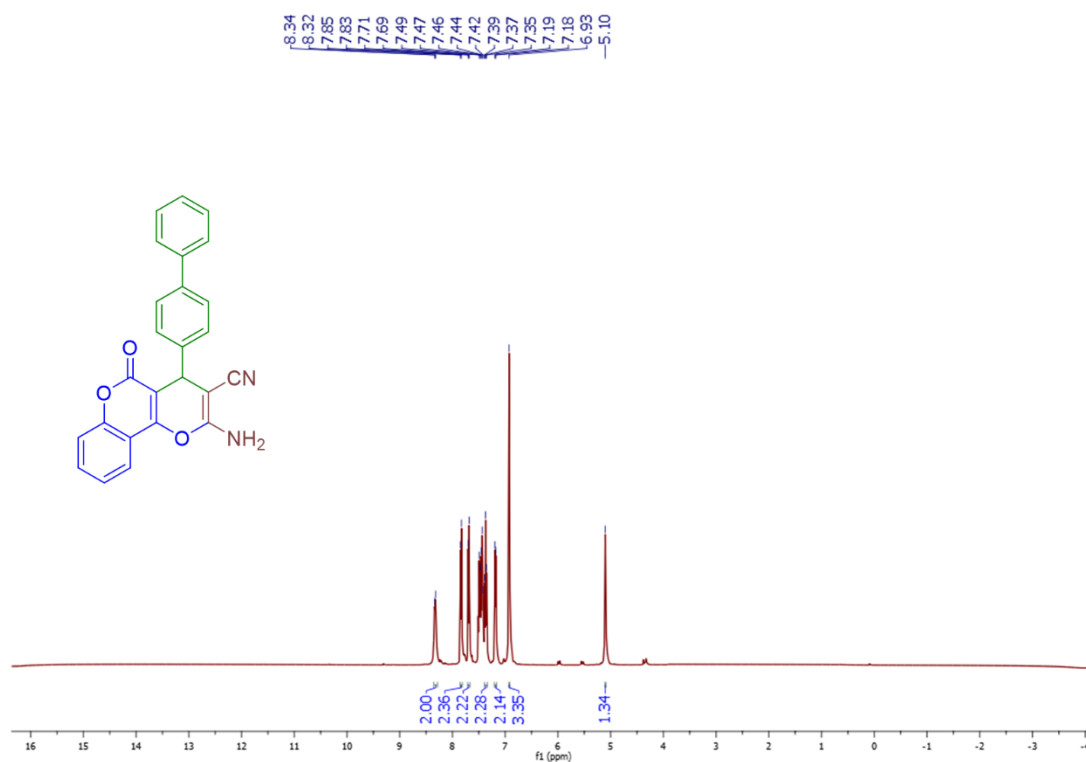

Figure S62.  $^1\text{H}$  NMR spectrum of **5l** in  $\text{DMSO-}d_6$  (400 MHz, 293 K).

## Supporting Information

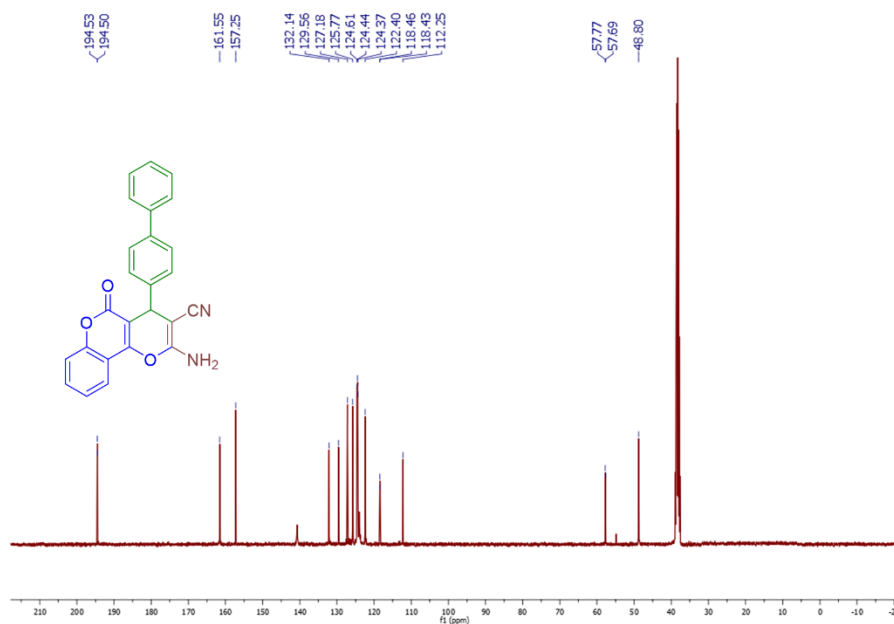

**Figure S63.**  $^{13}\text{C}\{^1\text{H}\}$  NMR spectrum of **5l** in  $\text{DMSO}-d_6$  (100 MHz, 293 K).

### 7. HR-MS of the catalytic products:

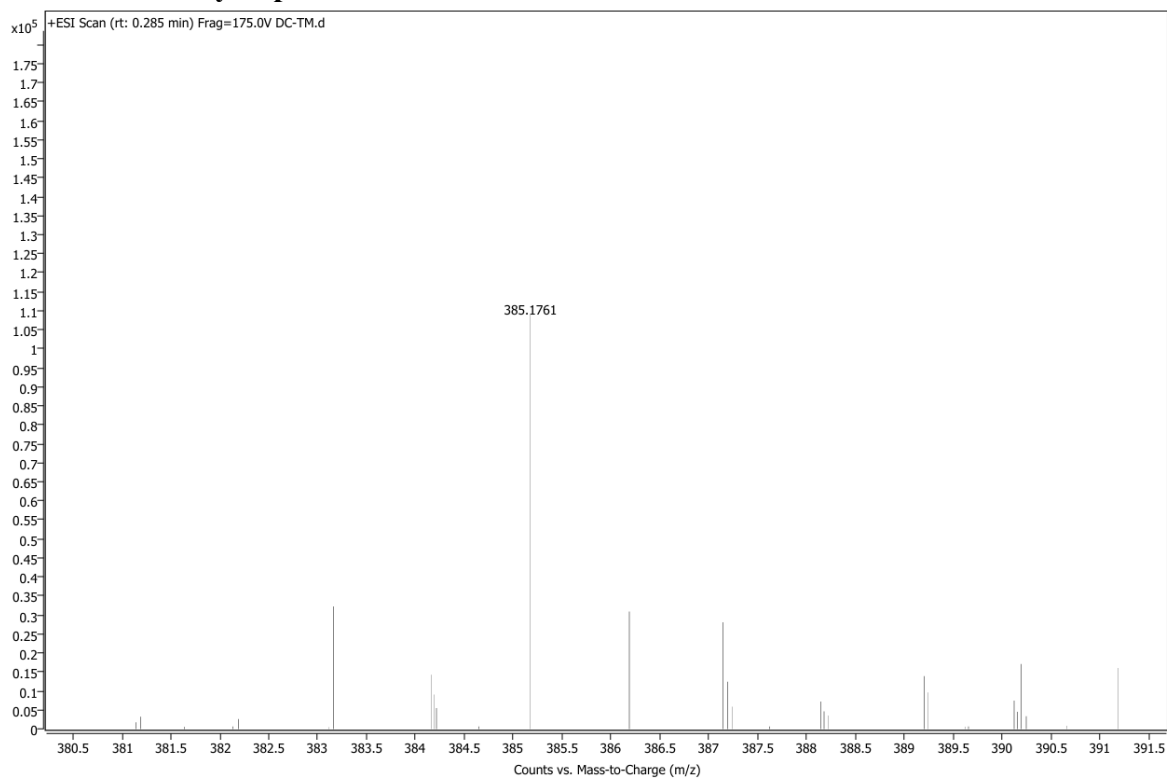

**Figure S64.** HRMS spectrum of product **4f**.

# Supporting Information

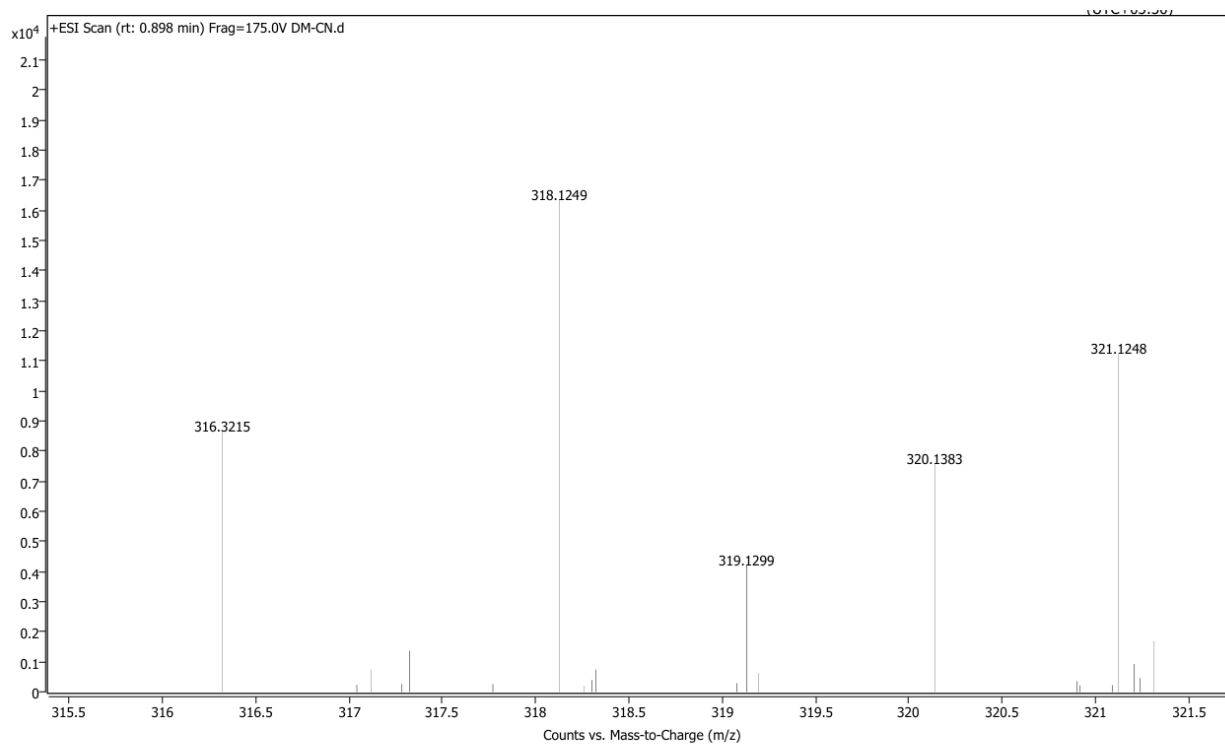

**Figure S65.** HRMS spectrum of product **4j**.

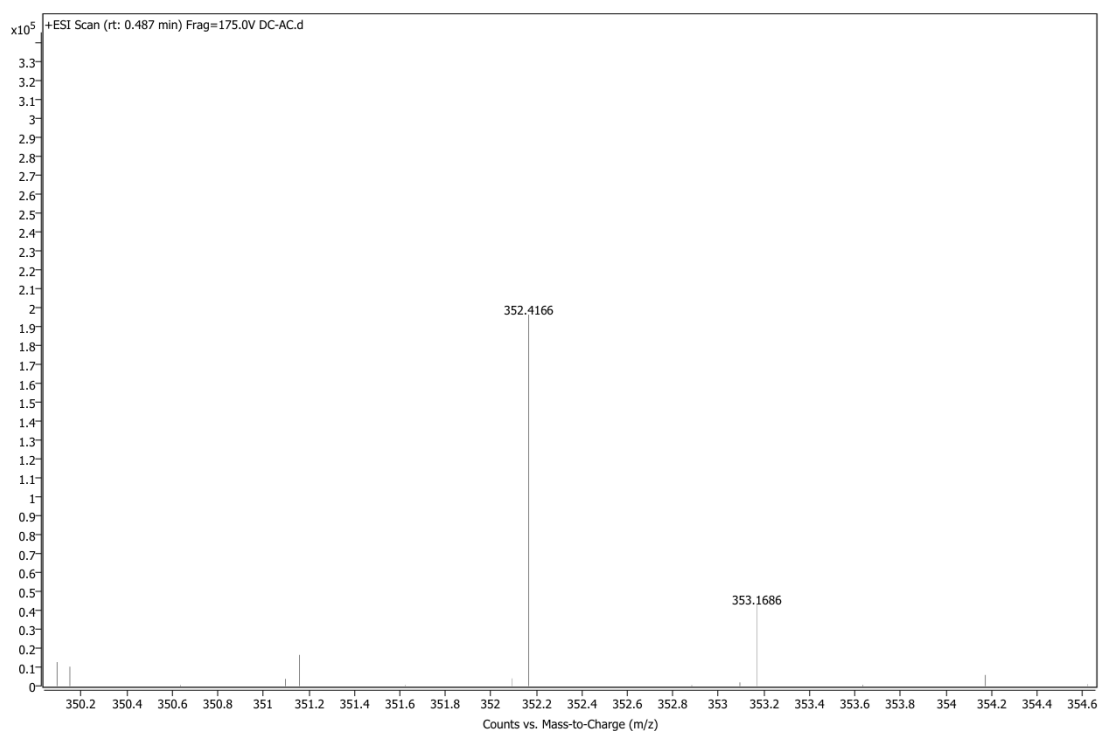

**Figure S66.** HRMS spectrum of product **4k**.

# Supporting Information

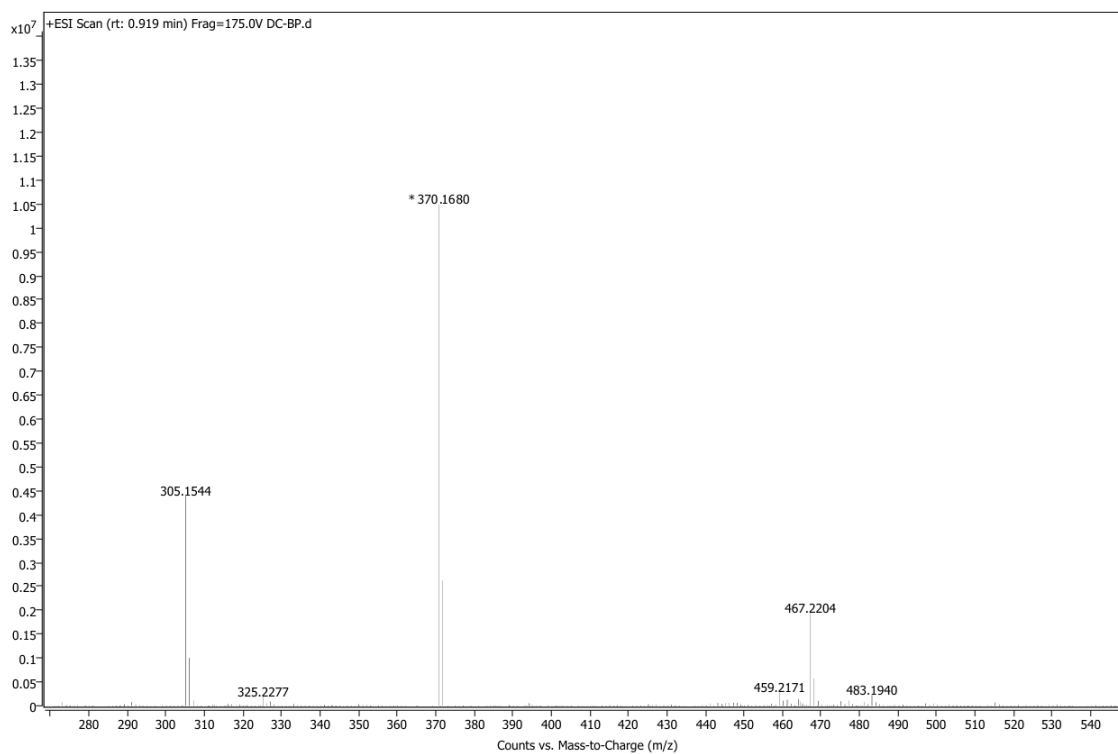

**Figure S67.** HRMS spectrum of product **4m**.

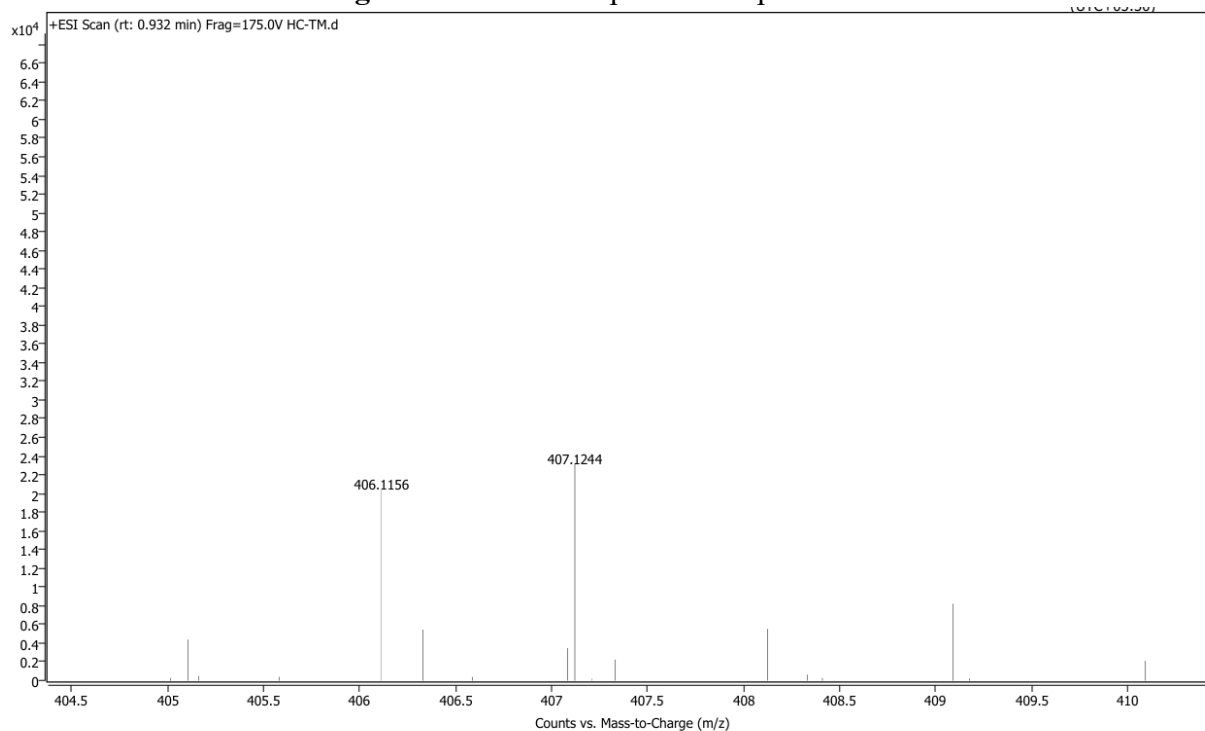

**Figure S68.** HRMS spectrum of product **5f**.

# Supporting Information

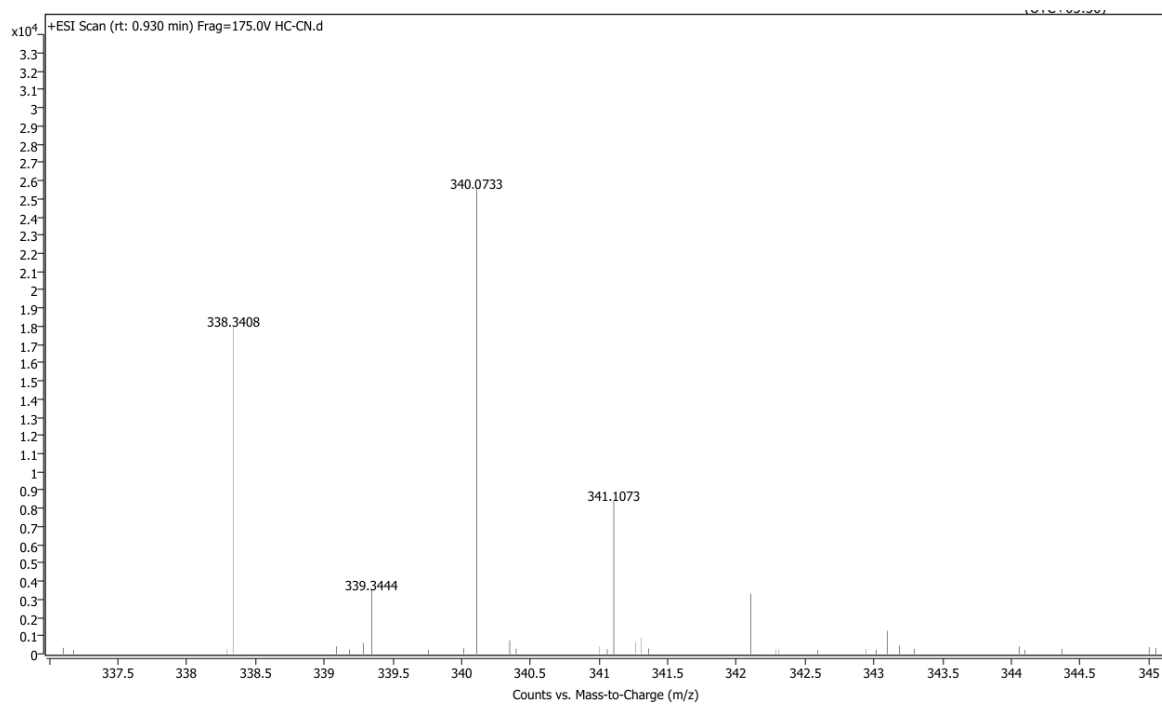

**Figure S69.** HRMS spectrum of product **5j**.

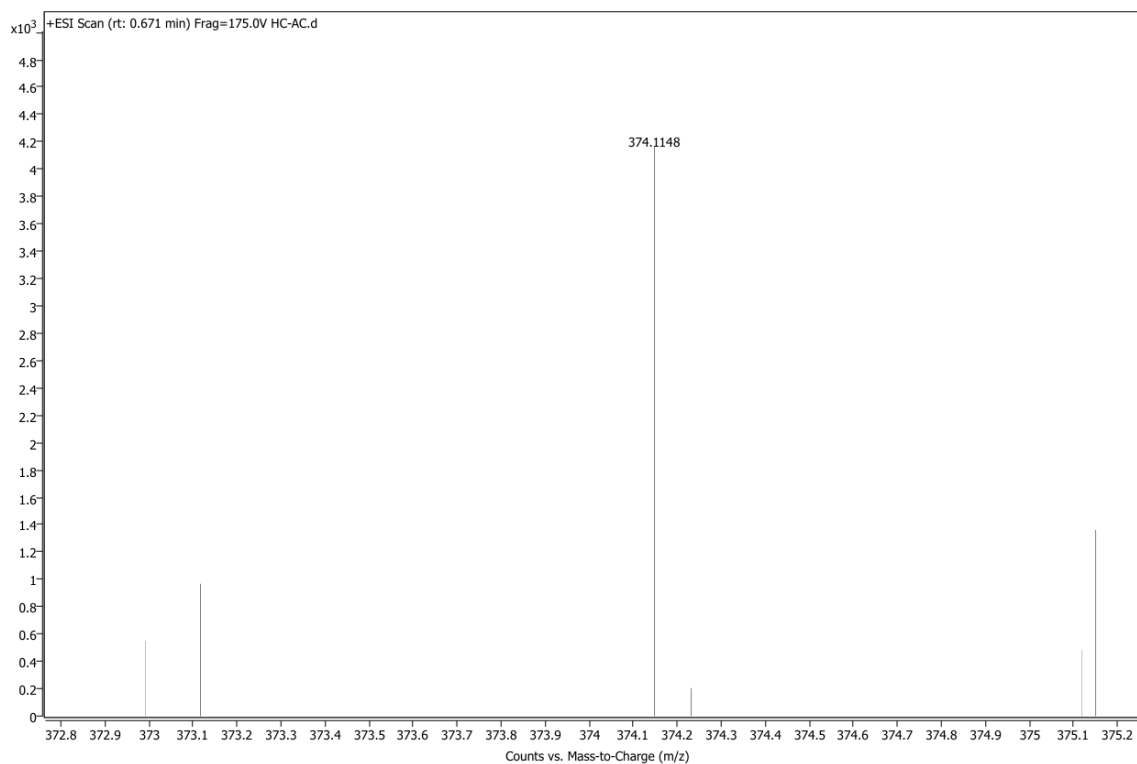

**Figure S70.** HRMS spectrum of product **5k**.

## Supporting Information

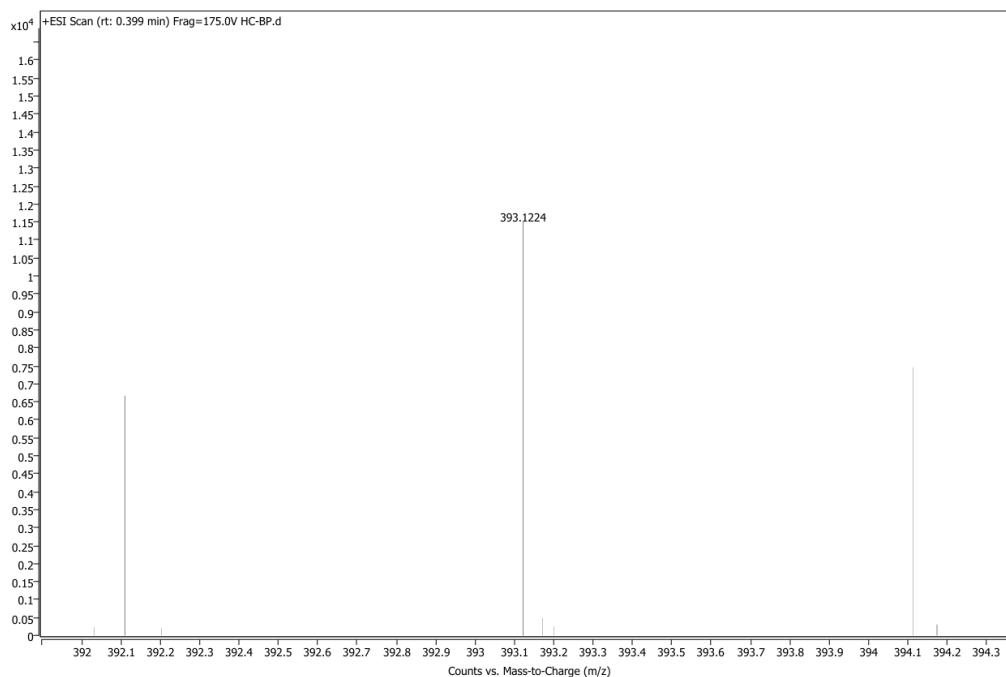

Figure S71. HRMS spectrum of product **5m**.

### 8. NMR spectra of the intermediates

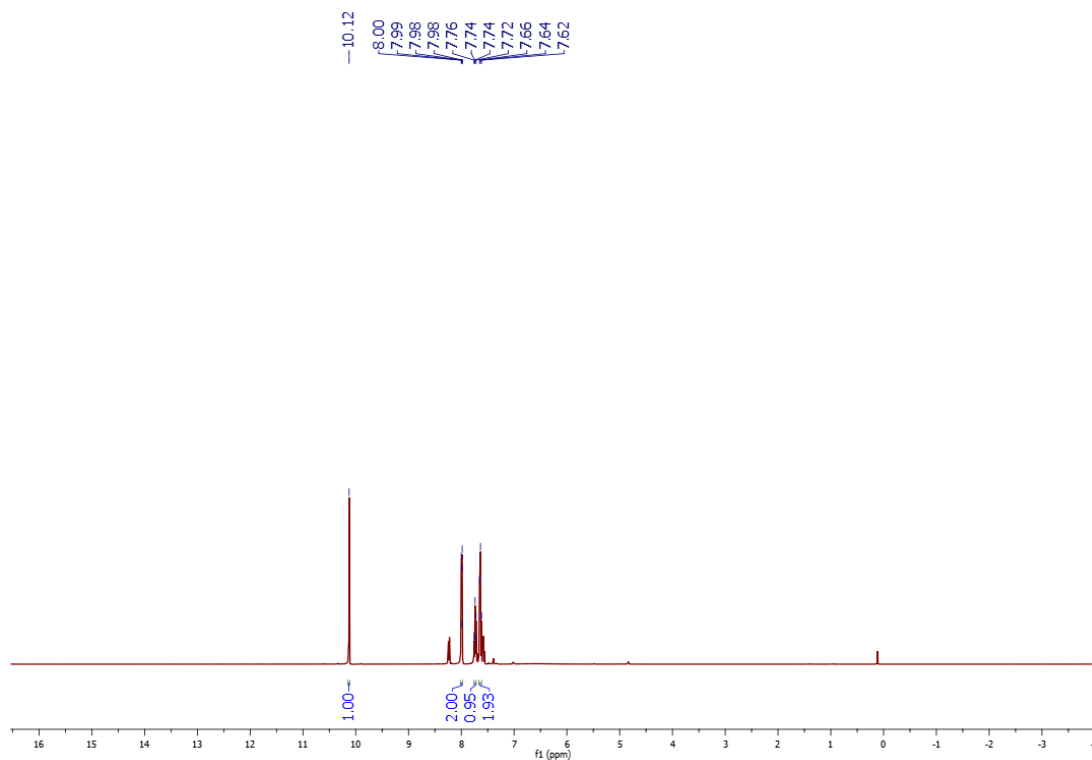

Figure S72.  $^1\text{H}$  NMR spectrum of intermediate **1a'** in  $\text{CDCl}_3$  (400 MHz, 293 K).

## Supporting Information

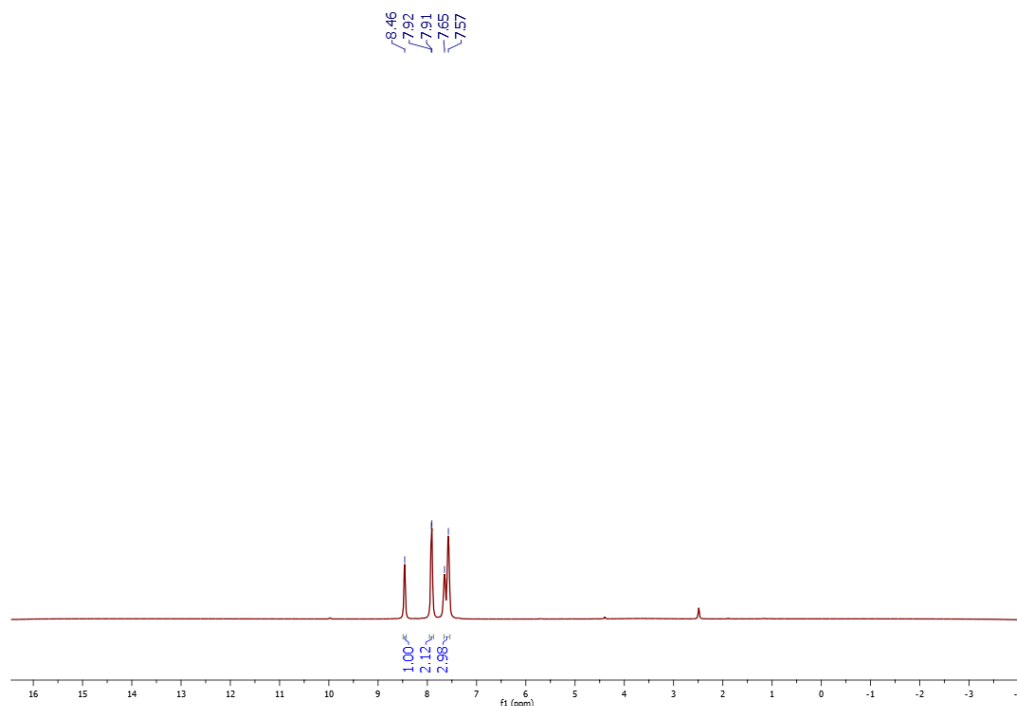

**Figure S73.** <sup>1</sup>H NMR spectrum of intermediate **2a'** in CDCl<sub>3</sub> (400 MHz, 293 K).

### 9. Confirmation of hydrogen gas

Under N<sub>2</sub> atmosphere, a mixture of C2 (2 mol%), t BuOK (2 mmol), benzyl alcohol (1.0 mmol) was dissolved in 3 mL of toluene, the mixture was placed in an oil bath and heated at 110 °C for 5 h. Then, the reaction mixture has been analyzed on GC-TCD detector to witness the liberation of hydrogen gas. (Scheme 5a)

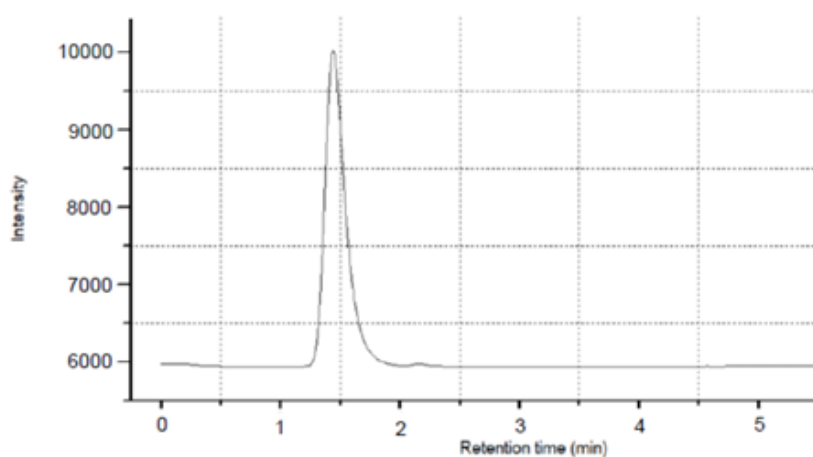

**Figure S74.** Chromatogram for the evaluation of H<sub>2</sub>

# Supporting Information

## 10. References:

1. A. I. Vogel, Test book of practical organic chemistry, Longman, London, 5th edn, 1989, 395.
2. Bruker, APEX2, SAINT, and SADABS, **2006**.
3. R.H. Blessing, *J. Appl. Crystallogr.* **1997**, 30, 421.
4. G. M. Sheldrick, *Acta Crystallogr. Sect. A Found. Crystallogr.* **2008**, 64, 112.
5. G. M. Sheldrick, *Acta Crystallogr. Sect. C Struct. Chem.* **2015**, 71, 3-8.
6. L.J. Farrugia, *J. Appl. Crystallogr.* **2012**, 45, 849.
7. C. F. Macrae, P. R. Edgington, P. McCabe, E. Pidcock, G. P. Shields, R. Taylor, M. Towler and J. V. De Streek, *J. Appl. Crystallogr.* **2006**, 39, 453.
8. M. R. Maurya, S. K. Maurya, N. Kumar and F. Avecilla, *J. Org. Chem.*, 2024, 89, 12143.
9. R. Gholami, A. Bamoniri and B. B. F. Mirjalili, *RSC Adv.*, 2022, 12, 27555.
10. A. Hasaninejad, M. Shekouhy, N. Golzar, A. Zare and M. M. Doroodmand, *Appl. Catal., A*, 2011, 402, 11.
